# Supplementary material for: Genome-wide analysis of Smad and Schnurri transcription factors in C. elegans demonstrates widespread interaction and a function in collagen secretion
Source: bioRxiv preprint, doi:10.1101/2024.06.05.597576, version 3 (2025-01-16)
Supplement: Supplementary File 2 [file 597576_file04.xlsx]

## Sheet: SMA3 vs N2
GeneID	Public Name	logFC	logCPM	F	PValue	FDR	-LOG(FDR)
WBGene00020869	T28A11.2	-7.02419	5.48093	2061.19	8.43e-23	3.95e-18	17.4032
WBGene00022569	ZC239.6	-7.14981	4.22557	1595.9	1.27e-21	2.98e-17	16.5263
WBGene00018056	F35F10.6	-7.41629	3.20547	1370.33	6.36e-21	9.94e-17	16.0025
WBGene00020883	fbxa-64	-5.52622	3.45105	1071.97	8.47e-20	9.93e-16	15.0032
WBGene00006916	vha-7	-5.89227	5.03575	1194.7	4.57e-18	4.12e-14	13.385
WBGene00021590	Y46D2A.2	-4.15965	3.69171	722.616	5.28e-18	4.12e-14	13.385
WBGene00018061	arrd-19	-7.23326	3.87365	973.201	7.52e-18	5.03e-14	13.298
WBGene00018055	F35F10.5	-6.39781	2.51586	668.242	1.19e-17	6.98e-14	13.1561
WBGene00011941	T23B5.4	-6.89628	1.65267	442.306	8.46e-16	4.4e-12	11.3561
WBGene00018353	fbxa-182	3.67002	2.28988	431.741	1.08e-15	5.08e-12	11.2943
WBGene00010407	scb-1	2.34608	4.34053	370.01	5.23e-15	2.23e-11	10.6523
WBGene00018057	F35F10.7	-5.59827	1.74273	350.246	9.12e-15	3.56e-11	10.4482
WBGene00018060	arrd-18	-7.00607	4.8351	1023.45	2.98e-14	1.07e-10	9.96934
WBGene00018054	F35F10.4	-4.21437	1.82217	303.638	3.85e-14	1.29e-10	9.88955
WBGene00007072	ugt-1	1.98754	4.64416	266.488	1.42e-13	4.44e-10	9.35263
WBGene00018200	btb-17	-5.05739	1.07632	253.926	2.3e-13	6.73e-10	9.17222
WBGene00018708	oac-32	2.62078	2.92531	247.49	2.96e-13	8.17e-10	9.08802
WBGene00206522	F14D2.19	-8.42594	4.068	819.466	4.55e-13	1.18e-09	8.92679
WBGene00012583	clec-4	1.60487	4.81656	215.405	1.16e-12	2.87e-09	8.54244
WBGene00013484	Y69H2.9	1.92454	3.62065	206.12	1.79e-12	4.19e-09	8.3777
WBGene00003778	nnt-1	1.89033	3.65887	192.164	3.54e-12	7.89e-09	8.10284
WBGene00009215	thn-2	2.74575	2.26389	188.39	4.28e-12	9.13e-09	8.03965
WBGene00019565	cyp-35A3	-1.74355	4.36038	173.606	9.41e-12	1.92e-08	7.71704
WBGene00015882	C17B7.8	-6.53213	0.276839	169.481	1.19e-11	2.31e-08	7.63548
WBGene00021412	cyp-29A3	-1.89933	2.83395	155.585	2.68e-11	5.02e-08	7.29938
WBGene00009430	F35E12.6	-1.15343	6.01088	152.181	3.3e-11	5.95e-08	7.22546
WBGene00008594	clec-57	-1.19212	4.8547	141.783	6.43e-11	1.09e-07	6.9617
WBGene00015605	C08E3.13	-4.58316	3.30694	265.431	6.52e-11	1.09e-07	6.9617
WBGene00017991	clec-180	-1.36647	7.94462	140.484	7e-11	1.13e-07	6.94611
WBGene00001156	ech-7	-1.20735	6.54524	139.34	7.56e-11	1.18e-07	6.92759
WBGene00009532	ccch-1	1.27568	6.65088	136.028	9.47e-11	1.43e-07	6.84428
WBGene00017589	F19B10.10	-3.38963	1.22712	132.741	1.19e-10	1.74e-07	6.75919
WBGene00017429	F13D11.4	-1.10934	6.29117	130.087	1.43e-10	2.04e-07	6.69116
WBGene00001541	gcy-15	-1.84095	2.6109	128.496	1.61e-10	2.22e-07	6.65462
WBGene00044376	Y49F6B.12	-6.50414	-0.217552	125.126	2.05e-10	2.75e-07	6.56061
WBGene00006436	ttn-1	-1.21053	9.41745	123.436	2.33e-10	2.95e-07	6.53036
WBGene00010019	F54B8.4	2.43042	1.80112	123.457	2.32e-10	2.95e-07	6.53036
WBGene00044663	F26G1.10	-3.12995	1.42832	121.815	2.63e-10	3.24e-07	6.48917
WBGene00009857	clec-28	2.21586	1.51262	119.203	3.21e-10	3.85e-07	6.41412
WBGene00009226	cyp-37B1	3.0718	0.844952	117.351	3.7e-10	4.34e-07	6.3629
WBGene00019818	R02C2.7	-2.20738	2.32271	116.853	3.85e-10	4.4e-07	6.35678
WBGene00010928	clec-258	-2.72294	1.02398	114.335	4.69e-10	5.24e-07	6.28102
WBGene00019779	endu-2	1.22275	8.32418	109.386	7.01e-10	7.64e-07	6.11696
WBGene00022641	ZK6.6	-1.47292	3.60834	107.327	8.32e-10	8.86e-07	6.05243
WBGene00014941	Y67H2A.9	-1.05303	4.89497	107.041	8.52e-10	8.88e-07	6.05175
WBGene00021500	Y40C7B.4	3.32064	1.00891	104.892	1.02e-09	1.04e-06	5.98209
WBGene00013544	Y75B8A.7	-1.06659	6.1225	104.024	1.1e-09	1.1e-06	5.95906
WBGene00015300	C01F1.5	-1.08215	5.50034	102.918	1.21e-09	1.18e-06	5.92662
WBGene00021740	Y50D4B.1	1.16732	4.21693	102.636	1.24e-09	1.19e-06	5.92492
WBGene00016877	C52D10.3	-1.13786	6.30237	99.7043	1.61e-09	1.51e-06	5.82136
WBGene00004062	pmp-5	-1.02021	8.55096	97.6938	1.93e-09	1.77e-06	5.75132
WBGene00050939	C05G5.7	-1.24596	4.9525	99.4134	2.01e-09	1.81e-06	5.74138
WBGene00003704	nhr-114	-1.29774	7.64544	109.725	2.08e-09	1.84e-06	5.73626
WBGene00018063	F35F10.14	-8.76224	-1.08305	108.265	2.17e-09	1.89e-06	5.72418
WBGene00269387	btb-22	-8.78317	-1.16988	103.857	3.07e-09	2.61e-06	5.58258
WBGene00015879	C17B7.5	-5.02572	1.05123	131.463	3.17e-09	2.65e-06	5.57631
WBGene00022645	ZK6.11	-1.13765	8.05746	91.8572	3.32e-09	2.73e-06	5.56351
WBGene00008987	F20G2.3	-1.03924	6.33803	90.8053	3.68e-09	2.97e-06	5.5272
WBGene00014077	ZK792.4	1.41803	3.58969	90.2418	3.88e-09	3.03e-06	5.51826
WBGene00269355	T28A11.25	-6.1795	0.241355	116.044	3.81e-09	3.03e-06	5.51869
WBGene00011400	T03F6.4	1.57026	3.79562	101.077	4.09e-09	3.14e-06	5.50278
WBGene00008925	F17H10.1	-0.92249	6.00102	88.1208	4.78e-09	3.61e-06	5.44232
WBGene00010833	M03B6.1	-1.52358	2.87576	87.1998	5.23e-09	3.89e-06	5.40956
WBGene00008577	F08G2.5	-1.73146	2.73205	85.398	6.27e-09	4.6e-06	5.33771
WBGene00019550	K09C4.5	-1.51725	3.97962	97.8983	6.5e-09	4.68e-06	5.32938
WBGene00021492	comt-5	-1.57475	2.40232	84.1367	7.14e-09	5.07e-06	5.2952
WBGene00017329	ugt-39	-1.45374	3.14815	83.9414	7.28e-09	5.09e-06	5.29301
WBGene00018195	btb-16	-2.2981	0.995939	83.7908	7.39e-09	5.1e-06	5.29272
WBGene00015910	C17F4.2	-1.69076	1.98059	82.0968	8.82e-09	5.99e-06	5.22268
WBGene00008233	C50F4.8	2.09946	4.31786	149.485	9.99e-09	6.65e-06	5.17738
WBGene00019322	ahcy-1	-1.0007	12.291	80.8353	1.01e-08	6.65e-06	5.17738
WBGene00020360	math-41	-0.960954	4.64148	80.5509	1.04e-08	6.76e-06	5.17034
WBGene00003995	pgp-1	-1.00613	6.08003	79.7152	1.13e-08	7.28e-06	5.13759
WBGene00015878	C17B7.4	-5.68071	-0.436022	79.3381	1.18e-08	7.48e-06	5.12591
WBGene00018052	F35F10.1	-5.73345	2.99091	260.446	1.2e-08	7.5e-06	5.12482
WBGene00018910	F56A4.2	-2.82855	0.733678	78.796	1.25e-08	7.73e-06	5.1121
WBGene00017583	F19B10.1	-4.46397	2.24951	180.938	1.28e-08	7.79e-06	5.10822
WBGene00023191	Y73B3A.17	-1.29706	3.16123	78.4739	1.3e-08	7.79e-06	5.10822
WBGene00021224	clec-209	-2.80019	0.774925	78.0876	1.46e-08	8.64e-06	5.06338
WBGene00012794	Y43E12A.2	1.11341	5.74815	84.0535	1.56e-08	9e-06	5.04568
WBGene00017459	F14D2.11	-5.85307	-1.06989	76.8928	1.54e-08	9e-06	5.04568
WBGene00000624	col-47	-1.26612	3.22817	75.9729	1.71e-08	9.71e-06	5.01291
WBGene00015519	doxa-1	1.09008	4.61015	75.9133	1.72e-08	9.71e-06	5.01291
WBGene00010044	F54C9.9	-0.798276	6.88345	75.2145	1.86e-08	1.04e-05	4.98417
WBGene00003485	mua-6	-0.866164	7.99972	74.5715	2e-08	1.08e-05	4.96538
WBGene00007530	C11H1.5	-0.984897	5.78219	74.7182	1.97e-08	1.08e-05	4.96538
WBGene00018656	txdc-12.2	-0.834867	7.76147	74.5188	2.01e-08	1.08e-05	4.96538
WBGene00006961	xnp-1	-0.807934	7.16386	73.8198	2.18e-08	1.16e-05	4.93589
WBGene00016995	acly-1	-0.990092	7.64054	73.0527	2.38e-08	1.25e-05	4.90269
WBGene00021167	cyp-32B1	2.15001	2.51803	95.0291	2.41e-08	1.26e-05	4.90123
WBGene00000972	dhs-8	-1.53281	2.15256	72.7127	2.47e-08	1.27e-05	4.89535
WBGene00003553	nas-37	-0.956182	7.67236	71.2718	2.92e-08	1.49e-05	4.82739
WBGene00007848	cytb-5.1	-0.768078	7.11642	70.7415	3.11e-08	1.53e-05	4.81428
WBGene00008560	pho-13	-0.979879	5.21442	70.8825	3.06e-08	1.53e-05	4.81428
WBGene00009840	fbxa-189	1.96536	1.3937	70.7834	3.09e-08	1.53e-05	4.81428
WBGene00001069	dpy-7	-1.25095	8.41401	88.2435	3.34e-08	1.61e-05	4.7924
WBGene00002260	lbp-8	-2.59416	0.575819	70.1434	3.34e-08	1.61e-05	4.7924
WBGene00007752	wdfy-3	-7.1463	5.13923	480.689	3.5e-08	1.67e-05	4.77646
WBGene00010754	K10G4.5	5.22149	-1.30006	69.207	3.73e-08	1.75e-05	4.7574
WBGene00019234	ugt-8	-0.785433	5.23875	69.2738	3.7e-08	1.75e-05	4.7574
WBGene00009061	pals-14	2.50519	0.250405	68.9067	3.87e-08	1.79e-05	4.74607
WBGene00022765	ZK546.14	-0.848829	7.4528	68.406	4.11e-08	1.89e-05	4.72413
WBGene00000657	col-81	2.00525	1.18611	68.0214	4.3e-08	1.96e-05	4.70813
WBGene00017446	F14B8.4	2.02729	0.870331	66.8577	4.96e-08	2.24e-05	4.65056
WBGene00007112	B0035.13	0.834494	5.73369	66.6451	5.09e-08	2.27e-05	4.64464
WBGene00018413	cyp-33C4	-1.79041	1.59119	66.5925	5.13e-08	2.27e-05	4.64464
WBGene00017103	klo-2	1.3017	2.65076	66.1976	5.38e-08	2.35e-05	4.62938
WBGene00019592	K09F6.9	-1.20926	3.628	66.1575	5.41e-08	2.35e-05	4.62938
WBGene00019450	K06H6.2	6.33338	-0.5426	88.4902	5.51e-08	2.37e-05	4.62547
WBGene00015400	cyp-35A2	-0.853015	6.15096	65.6787	5.74e-08	2.45e-05	4.61148
WBGene00000138	amx-2	0.856664	5.30801	64.9156	6.32e-08	2.57e-05	4.58926
WBGene00007170	B0393.5	-0.984029	5.16551	65.4123	6.29e-08	2.57e-05	4.58926
WBGene00009084	F23B12.7	-0.740777	7.51362	65.1165	6.16e-08	2.57e-05	4.58926
WBGene00010231	F58B3.4	-0.81345	6.75282	64.9676	6.28e-08	2.57e-05	4.58926
WBGene00012199	mltn-3	-8.4158	4.34932	424.527	6.27e-08	2.57e-05	4.58926
WBGene00018966	F56D2.5	1.68593	3.57266	88.9329	6.65e-08	2.64e-05	4.57806
WBGene00020239	T05B4.8	3.33941	0.057948	64.6469	6.53e-08	2.64e-05	4.57831
WBGene00021726	bath-10	3.761	-1.14026	64.547	6.62e-08	2.64e-05	4.57806
WBGene00000778	cpn-2	-0.929591	4.78923	63.6661	7.4e-08	2.84e-05	4.54612
WBGene00008360	nspc-19	-1.31517	4.0678	74.4222	7.21e-08	2.84e-05	4.54685
WBGene00010759	cysl-2	-0.954542	6.69713	66.0361	7.35e-08	2.84e-05	4.54612
WBGene00017461	bath-28	-5.58566	0.821344	112.837	7.3e-08	2.84e-05	4.54612
WBGene00008681	scrm-4	-1.57493	3.25861	76.4878	7.54e-08	2.87e-05	4.54188
WBGene00021339	Y34F4.4	2.28298	0.699578	63.1496	7.91e-08	2.99e-05	4.52444
WBGene00006595	top-1	-0.72546	7.69315	62.853	8.22e-08	3.01e-05	4.52164
WBGene00012911	acl-7	-0.809879	5.93756	62.8767	8.19e-08	3.01e-05	4.52164
WBGene00017499	pud-1.1	2.09992	0.62171	63.0348	8.03e-08	3.01e-05	4.52164
WBGene00020516	T15B7.1	-0.783362	5.53079	62.8544	8.21e-08	3.01e-05	4.52164
WBGene00000928	dao-2	-0.949295	9.03408	62.7054	8.37e-08	3.02e-05	4.52009
WBGene00007672	fbxa-136	2.06215	0.972293	62.7286	8.35e-08	3.02e-05	4.52009
WBGene00019911	R06A10.4	0.912846	4.08995	62.4885	8.61e-08	3.08e-05	4.51123
WBGene00001071	dpy-9	-1.11077	7.99929	74.1012	8.79e-08	3.1e-05	4.50868
WBGene00219216	K08D10.14	1.21747	2.58822	62.3767	8.74e-08	3.1e-05	4.50868
WBGene00021075	sms-5	1.33452	2.3629	62.2098	8.93e-08	3.12e-05	4.50536
WBGene00020595	T20B5.2	1.25113	2.91379	62.1309	9.02e-08	3.13e-05	4.50413
WBGene00009856	clec-24	2.94142	-0.0146376	61.8973	9.3e-08	3.2e-05	4.49452
WBGene00009902	drd-1	-0.752814	5.35772	61.7926	9.43e-08	3.2e-05	4.49452
WBGene00017703	F22E5.1	-1.32722	3.72715	69.7918	9.4e-08	3.2e-05	4.49452
WBGene00019978	hacd-1	-1.47545	5.97404	103.376	9.75e-08	3.29e-05	4.48292
WBGene00008886	F16C3.2	1.30335	2.48769	61.4587	9.85e-08	3.3e-05	4.48178
WBGene00006928	vit-4	2.56591	0.176405	61.0101	1.04e-07	3.45e-05	4.46231
WBGene00009859	clec-33	2.01863	0.983098	61.0678	1.04e-07	3.45e-05	4.46254
WBGene00004025	phy-2	-0.747003	7.09963	60.8012	1.07e-07	3.5e-05	4.4564
WBGene00016786	cyp-35A4	-1.37606	1.9586	60.8181	1.07e-07	3.5e-05	4.4564
WBGene00000480	cgp-1	0.89414	6.42698	60.5336	1.11e-07	3.6e-05	4.444
WBGene00011696	eea-1	-0.785978	6.52432	60.2822	1.15e-07	3.69e-05	4.43247
WBGene00012824	Y43F8B.14	1.98822	1.30654	60.221	1.16e-07	3.7e-05	4.4319
WBGene00021464	ugt-31	2.43756	3.43463	122.412	1.21e-07	3.83e-05	4.41689
WBGene00003959	pcp-4	-0.847233	5.33379	59.8259	1.22e-07	3.85e-05	4.41485
WBGene00017462	F14D2.14	-4.17265	-0.823761	59.4104	1.29e-07	4.04e-05	4.39353
WBGene00017312	pitr-5	1.65188	1.60321	59.3186	1.31e-07	4.06e-05	4.39105
WBGene00020128	R193.2	-0.91122	7.00955	60.5002	1.35e-07	4.17e-05	4.37967
WBGene00077751	irld-27	-5.3583	-1.40487	58.8797	1.39e-07	4.26e-05	4.371
WBGene00018510	F46F11.7	-0.852562	4.74076	58.767	1.41e-07	4.29e-05	4.36744
WBGene00018874	tag-234	0.890121	3.93729	58.7234	1.42e-07	4.29e-05	4.36744
WBGene00003055	lon-1	0.842184	7.51719	58.655	1.43e-07	4.3e-05	4.36619
WBGene00008073	C43F9.5	1.47087	1.52479	58.4267	1.48e-07	4.41e-05	4.35548
WBGene00044316	F41G3.21	1.51231	2.6706	61.379	1.5e-07	4.44e-05	4.35225
WBGene00018811	pmt-2	-0.813319	9.58955	58.0545	1.55e-07	4.58e-05	4.33889
WBGene00044553	T23B12.11	0.925939	4.04288	57.9689	1.57e-07	4.61e-05	4.33652
WBGene00004860	sma-6	-0.794994	5.19276	57.5196	1.67e-07	4.87e-05	4.3124
WBGene00001430	fkb-5	-0.86068	8.02648	57.1649	1.76e-07	5.08e-05	4.2938
WBGene00021984	Y59C2A.1	1.22512	4.31995	68.8752	1.79e-07	5.15e-05	4.2885
WBGene00022415	Y102A11A.5	-0.984838	6.30558	64.5354	1.85e-07	5.3e-05	4.27588
WBGene00011799	T16G1.5	1.47358	2.02122	56.5976	1.9e-07	5.4e-05	4.26752
WBGene00004857	sma-3	-0.810404	4.62904	56.4972	1.93e-07	5.44e-05	4.26405
WBGene00019615	K10B4.3	0.802004	4.83631	56.2202	2e-07	5.63e-05	4.24982
WBGene00011927	T22C8.6	1.6824	3.74079	85.0743	2.07e-07	5.78e-05	4.23809
WBGene00020250	T05C1.3	-0.839704	4.21865	55.4745	2.23e-07	6.18e-05	4.20935
WBGene00010765	K10H10.10	1.62615	1.78088	55.3422	2.27e-07	6.26e-05	4.20377
WBGene00019090	F59A7.2	-1.11694	2.97655	55.2054	2.31e-07	6.34e-05	4.19788
WBGene00020846	T27A10.6	-0.97891	7.44576	61.952	2.42e-07	6.59e-05	4.18088
WBGene00016329	osr-1	-0.974468	5.74055	61.4295	2.67e-07	7.25e-05	4.13992
WBGene00022548	ZC196.4	1.99863	0.695979	54.0425	2.73e-07	7.36e-05	4.13308
WBGene00021448	Y39D8A.1	-1.13076	3.35892	53.8982	2.79e-07	7.47e-05	4.12652
WBGene00005552	sri-40	-5.80163	0.662292	101.523	2.89e-07	7.66e-05	4.11584
WBGene00304815	Y40A1A.6	-1.04159	3.13186	53.6542	2.89e-07	7.66e-05	4.11584
WBGene00008565	acox-1.2	-1.53638	8.63617	94.8803	2.96e-07	7.79e-05	4.10847
WBGene00011538	T06E6.1	-0.887381	4.60261	53.4278	2.99e-07	7.82e-05	4.10668
WBGene00022574	ZC239.16	-1.85868	0.831868	53.375	3.01e-07	7.84e-05	4.10577
WBGene00008936	papl-1	-0.676	6.19013	53.0963	3.13e-07	8.12e-05	4.0905
WBGene00044530	F32D1.11	-0.802335	4.51705	52.9499	3.2e-07	8.2e-05	4.08597
WBGene00235268	Y54G2A.76	-0.843564	5.25022	52.9812	3.19e-07	8.2e-05	4.08597
WBGene00001775	gst-27	-0.711024	6.41106	52.8395	3.26e-07	8.27e-05	4.08256
WBGene00007362	cyp-35C1	-0.760512	5.73067	52.8223	3.26e-07	8.27e-05	4.08256
WBGene00010291	F58H10.1	-1.04324	5.20673	62.6223	3.32e-07	8.37e-05	4.0773
WBGene00000191	arl-7	2.10061	0.734814	52.5328	3.41e-07	8.54e-05	4.06874
WBGene00011487	T05E12.6	-0.760607	7.65682	52.4121	3.47e-07	8.64e-05	4.06332
WBGene00043062	clec-80	0.856528	5.07458	52.343	3.5e-07	8.69e-05	4.06119
WBGene00014136	ZK896.5	1.76121	2.97622	71.8651	3.57e-07	8.81e-05	4.05484
WBGene00003214	mel-32	-0.761722	9.37242	52.0676	3.65e-07	8.86e-05	4.05258
WBGene00020194	T03G6.1	-0.912349	7.25287	56.5632	3.62e-07	8.86e-05	4.05258
WBGene00045455	F26G1.11	-1.31773	2.7646	52.0851	3.64e-07	8.86e-05	4.05258
WBGene00018744	F53B3.6	-0.853157	6.73926	53.2602	3.7e-07	8.9e-05	4.05037
WBGene00020932	dhod-1	-0.639513	6.67904	52.0022	3.68e-07	8.9e-05	4.05061
WBGene00003482	mua-3	-0.867012	8.81296	51.7333	3.83e-07	9.17e-05	4.03769
WBGene00000988	dhs-25	-0.938824	6.84374	58.2737	3.9e-07	9.19e-05	4.03685
WBGene00010745	dod-17	-1.05728	4.12777	54.5127	3.89e-07	9.19e-05	4.03685
WBGene00023489	F42A10.9	-0.895688	3.88347	51.6517	3.88e-07	9.19e-05	4.03685
WBGene00009809	F47B8.8	1.23127	2.41577	51.2681	4.11e-07	9.63e-05	4.01626
WBGene00001119	dyf-3	-1.3061	2.37513	51.1532	4.18e-07	9.74e-05	4.01152
WBGene00012910	Y46G5A.20	1.7571	1.79234	53.9164	4.24e-07	9.74e-05	4.01152
WBGene00016431	C35A11.4	-1.00063	4.77631	57.196	4.22e-07	9.74e-05	4.01152
WBGene00022326	fbxa-14	1.38664	3.0696	57.6421	4.24e-07	9.74e-05	4.01152
WBGene00010657	K08D8.3	-0.714916	5.32098	50.6483	4.51e-07	0.000103114	3.98668
WBGene00020995	W03F8.6	1.65924	3.01595	67.6374	4.53e-07	0.000103114	3.98668
WBGene00017705	F22E5.6	2.55962	0.0148233	50.2296	4.81e-07	0.000108882	3.96304
WBGene00009839	fbxa-188	1.90653	0.951804	50.045	4.95e-07	0.000111452	3.95291
WBGene00000726	col-153	-0.951493	4.29969	49.8737	5.08e-07	0.00011386	3.94363
WBGene00022274	Y73E7A.8	-1.23733	6.97982	75.7564	5.14e-07	0.000114644	3.94065
WBGene00013439	Y66D12A.13	0.887477	4.34719	49.7571	5.17e-07	0.000114813	3.94001
WBGene00012540	Y37A1B.7	-1.39187	5.83379	85.2899	5.29e-07	0.000116554	3.93347
WBGene00194803	C25F9.16	2.84919	-0.554406	49.5976	5.3e-07	0.000116554	3.93347
WBGene00021343	cutl-23	1.17317	3.16403	49.5665	5.32e-07	0.000116565	3.93343
WBGene00020083	R57.2	-0.83054	5.14474	49.4521	5.42e-07	0.000118081	3.92782
WBGene00021928	Y55F3AM.11	-1.00598	3.1094	49.284	5.56e-07	0.00012062	3.91858
WBGene00011771	T14G8.3	-0.720952	8.17128	49.1848	5.64e-07	0.000121918	3.91393
WBGene00008091	C44F1.1	-0.812876	4.118	49.0201	5.79e-07	0.000123358	3.90883
WBGene00009213	thn-1	2.60685	-0.828788	49.0509	5.76e-07	0.000123358	3.90883
WBGene00018898	F55F10.1	-0.736244	7.86122	49.0489	5.76e-07	0.000123358	3.90883
WBGene00220261	ZC434.10	-0.850592	3.98953	48.7532	6.03e-07	0.000127995	3.89281
WBGene00013673	Y105E8A.13	-0.81746	4.89826	48.7111	6.07e-07	0.000128255	3.89193
WBGene00007925	C34C12.6	-0.750915	5.75819	48.4949	6.28e-07	0.000132056	3.87924
WBGene00008677	F11A5.9	0.972351	3.39327	48.2642	6.51e-07	0.000135691	3.86745
WBGene00018789	F54C1.1	1.52656	2.6378	55.9478	6.5e-07	0.000135691	3.86745
WBGene00002188	kgb-2	1.5818	1.53591	48.1885	6.59e-07	0.000136702	3.86422
WBGene00007876	dct-19	3.78429	-0.0698619	62.9234	6.8e-07	0.000140341	3.85282
WBGene00012592	Y38E10A.14	-0.784937	5.86995	47.9218	6.87e-07	0.000141301	3.84985
WBGene00010174	F56H9.2	-0.722425	5.68033	47.5675	7.27e-07	0.000148775	3.82747
WBGene00012912	Y46G5A.22	-1.74622	1.20742	47.5285	7.31e-07	0.000149046	3.82668
WBGene00015781	C14F11.6	-0.757242	6.85509	47.4569	7.4e-07	0.000150093	3.82364
WBGene00013474	Y69E1A.2	3.98263	-1.53552	47.129	7.79e-07	0.000157439	3.80289
WBGene00007375	C06C3.4	-0.995442	2.81663	47.0133	7.94e-07	0.00015954	3.79713
WBGene00013592	Y81G3A.4	-1.05591	2.83199	46.9654	8e-07	0.00015954	3.79713
WBGene00017500	pud-2.2	1.93918	0.504406	46.9742	7.99e-07	0.00015954	3.79713
WBGene00194898	C17B7.14	-6.12515	-2.03296	46.8597	8.13e-07	0.00016157	3.79164
WBGene00019962	cysl-3	-0.793078	4.0576	46.7953	8.22e-07	0.000162555	3.789
WBGene00007285	C04A11.1	0.985841	2.74583	46.5483	8.55e-07	0.000168414	3.77362
WBGene00008105	C45B11.2	2.90673	-0.833054	46.3477	8.83e-07	0.000173212	3.76142
WBGene00017605	sart-1	-0.615014	6.76266	46.2959	8.91e-07	0.000173935	3.75961
WBGene00021850	Y54F10AM.6	-0.775433	5.12702	46.26	8.96e-07	0.000174222	3.7589
WBGene00001819	haf-9	-0.635757	8.34088	46.1237	9.16e-07	0.000177363	3.75114
WBGene00019318	K02E10.4	-1.2522	6.0507	73.501	9.46e-07	0.000182572	3.73857
WBGene00009008	F21D5.3	-0.876283	6.11562	51.2108	9.69e-07	0.000186187	3.73005
WBGene00005952	srx-61	8.26233	-2.31075	53.9866	9.75e-07	0.000186487	3.72935
WBGene00011003	R04B5.5	0.695411	4.35556	45.5255	1.01e-06	0.000192289	3.71605
WBGene00009671	mfap-1	-0.677525	6.11255	45.1979	1.06e-06	0.000202054	3.69453
WBGene00010319	F59B10.3	0.925514	4.67518	48.8608	1.08e-06	0.00020392	3.69054
WBGene00004259	pyr-1	-0.799079	8.7652	45.0633	1.09e-06	0.000204912	3.68843
WBGene00003717	nhr-127	1.81426	0.576145	44.9451	1.11e-06	0.000206448	3.68519
WBGene00009257	F29G6.1	0.884307	4.41529	44.9612	1.11e-06	0.000206448	3.68519
WBGene00017460	bath-30	-1.86461	0.67528	44.9909	1.1e-06	0.000206448	3.68519
WBGene00006510	mtrr-1	-0.655182	7.86597	44.8588	1.13e-06	0.000208576	3.68073
WBGene00012631	vmo-1	-2.39946	-0.629601	44.7834	1.14e-06	0.000210357	3.67704
WBGene00017201	grsp-4	-0.790239	6.04319	45.8638	1.15e-06	0.000210667	3.6764
WBGene00007001	tufm-2	-0.592932	6.56518	44.579	1.18e-06	0.000215047	3.66747
WBGene00009515	clec-170	-0.723283	4.69332	44.5917	1.18e-06	0.000215047	3.66747
WBGene00004315	rbd-1	-0.611871	6.98416	44.5246	1.19e-06	0.000216153	3.66524
WBGene00010629	sluh-7	-0.638555	6.16488	43.9796	1.3e-06	0.00023486	3.62919
WBGene00015695	ugt-26	1.13175	6.06931	64.6354	1.3e-06	0.00023486	3.62919
WBGene00009224	F28F8.7	-0.957347	3.11899	43.8768	1.33e-06	0.000238019	3.62339
WBGene00012939	subs-4	-0.754815	5.51024	43.807	1.34e-06	0.000239899	3.61997
WBGene00018488	acs-1	-0.643913	7.58064	43.7328	1.36e-06	0.00024198	3.61622
WBGene00018778	F53H1.4	-0.603536	6.50699	43.6745	1.37e-06	0.000243436	3.61361
WBGene00001070	dpy-8	-1.29206	8.69367	69.582	1.42e-06	0.000247726	3.60603
WBGene00001240	elo-2	-0.692546	8.14702	43.5031	1.41e-06	0.000247726	3.60603
WBGene00016874	C52B11.5	-0.845822	3.78183	43.5283	1.41e-06	0.000247726	3.60603
WBGene00020989	W03D8.8	-0.912881	3.29386	43.5196	1.41e-06	0.000247726	3.60603
WBGene00021518	hpo-6	-0.697047	5.34612	43.3934	1.44e-06	0.000250487	3.60121
WBGene00011575	madf-4	1.07824	2.72044	43.3251	1.45e-06	0.000252458	3.59781
WBGene00007984	irx-1	0.811898	4.14054	43.2869	1.46e-06	0.000253152	3.59662
WBGene00022782	ZK622.4	1.19771	3.26314	47.5476	1.49e-06	0.000256464	3.59097
WBGene00013007	Y48E1B.8	-0.676306	7.58408	43.1373	1.5e-06	0.000256799	3.59041
WBGene00013835	mlt-4	-0.799951	3.94453	43.1458	1.5e-06	0.000256799	3.59041
WBGene00022269	aatf-1	-0.627881	5.15331	42.9273	1.56e-06	0.000265149	3.57651
WBGene00009891	scl-10	-1.56971	0.832677	42.8965	1.56e-06	0.0002653	3.57626
WBGene00044080	D1086.10	2.73065	-0.92062	42.8814	1.57e-06	0.0002653	3.57626
WBGene00001774	gst-26	-0.604349	6.01096	42.7793	1.6e-06	0.00026898	3.57028
WBGene00015914	C17F4.8	-4.6955	-1.18031	42.7038	1.62e-06	0.000271488	3.56625
WBGene00011109	gpch-1	-0.647036	5.43014	42.6079	1.64e-06	0.000274983	3.56069
WBGene00008688	rbm-34	-0.646874	6.55311	42.5571	1.66e-06	0.000276395	3.55847
WBGene00000599	col-10	1.46033	1.81899	42.5116	1.67e-06	0.000277566	3.55663
WBGene00017241	pcyt-1	-0.682702	6.64113	42.4858	1.68e-06	0.00027781	3.55625
WBGene00010652	K08C9.5	-1.51186	1.25304	42.2961	1.73e-06	0.000285982	3.54366
WBGene00007716	fbxa-82	2.28208	1.22373	55.2447	1.75e-06	0.000287692	3.54107
WBGene00018776	F53H1.1	-0.662133	6.78801	42.1524	1.78e-06	0.000291087	3.53598
WBGene00011032	ddx-52	-0.609151	6.23946	42.0503	1.81e-06	0.000295221	3.52985
WBGene00006629	tsp-3	1.29489	1.51268	41.9391	1.84e-06	0.000299893	3.52303
WBGene00018572	lin-42	-0.848064	8.91957	44.6684	1.98e-06	0.000320464	3.49422
WBGene00010306	golg-4	-0.573808	7.42245	41.2848	2.06e-06	0.000333659	3.4767
WBGene00010835	M03B6.3	-1.14243	6.81134	62.3543	2.09e-06	0.000337035	3.47232
WBGene00004264	qua-1	-1.5263	9.54129	78.1287	2.11e-06	0.000337481	3.47175
WBGene00016276	C30G12.4	-0.945634	3.15481	41.1607	2.11e-06	0.000337481	3.47175
WBGene00012015	T25B9.9	-0.635369	8.53641	41.0534	2.15e-06	0.000341577	3.46651
WBGene00012383	ttr-17	0.943433	4.5782	46.3508	2.15e-06	0.000341577	3.46651
WBGene00017300	rpc-2	-0.625727	7.90028	40.9978	2.17e-06	0.000343733	3.46378
WBGene00001398	fat-6	-0.705759	8.69902	40.9195	2.2e-06	0.000346019	3.4609
WBGene00007560	C14A4.9	-0.77016	5.75884	42.1439	2.21e-06	0.000346019	3.4609
WBGene00017716	sups-1	-0.850972	7.32859	46.1438	2.21e-06	0.000346019	3.4609
WBGene00017839	F26G1.3	2.97578	-1.02438	40.9129	2.2e-06	0.000346019	3.4609
WBGene00019285	cbn-1	-0.705614	5.65836	40.7297	2.28e-06	0.000354336	3.45058
WBGene00013315	Y57G11C.20	-1.766	0.164964	40.4851	2.38e-06	0.000368745	3.43327
WBGene00015684	C10G8.8	-0.621627	7.195	40.2297	2.49e-06	0.000384554	3.41504
WBGene00008356	nspc-20	-0.627835	5.76645	40.0751	2.56e-06	0.000392679	3.40596
WBGene00014206	nit-1	-0.793268	4.03669	40.0772	2.55e-06	0.000392679	3.40596
WBGene00022204	Y73B3A.2	-1.19202	2.87885	41.8473	2.57e-06	0.000394171	3.40432
WBGene00016505	ttr-33	1.42743	4.36002	65.7916	2.61e-06	0.000398656	3.3994
WBGene00019519	K08B5.2	1.05636	2.673	39.8057	2.68e-06	0.000408014	3.38932
WBGene00003786	npa-1	-0.721079	10.6719	39.5942	2.78e-06	0.000422408	3.37427
WBGene00302974	Y65B4BM.3	-0.77018	7.29902	41.3756	2.81e-06	0.00042463	3.37199
WBGene00003710	nhr-120	0.693632	4.28251	39.5104	2.83e-06	0.000426064	3.37053
WBGene00011244	R11D1.3	0.957644	2.98588	39.3995	2.88e-06	0.000433255	3.36326
WBGene00010545	cbp-2	1.478	3.68554	59.1939	2.9e-06	0.000434967	3.36154
WBGene00021236	pud-1.2	1.7979	0.594894	39.3076	2.93e-06	0.00043769	3.35883
WBGene00015733	C13B9.2	-1.42214	1.24938	39.2647	2.95e-06	0.00043969	3.35685
WBGene00004875	smd-1	-0.726911	7.78352	39.2403	2.97e-06	0.000440238	3.35631
WBGene00022378	Y94H6A.5	-0.573417	6.56828	39.2061	2.99e-06	0.000441571	3.355
WBGene00008304	C54D10.10	1.36918	2.07488	39.995	3e-06	0.000442934	3.35366
WBGene00007545	C13B4.1	0.733555	4.73249	39.1245	3.03e-06	0.000443932	3.35268
WBGene00011449	T04H1.2	0.558436	5.744	39.1406	3.02e-06	0.000443932	3.35268
WBGene00010638	K07F5.14	-0.61215	5.99186	38.9796	3.11e-06	0.000454329	3.34263
WBGene00017356	F10E9.4	-0.575755	5.61596	38.8352	3.19e-06	0.000464956	3.33259
WBGene00000219	asp-6	0.693285	10.748	38.7831	3.22e-06	0.000467931	3.32982
WBGene00021286	tald-1	-0.596753	8.16652	38.7005	3.27e-06	0.000473556	3.32463
WBGene00013216	Y54G11A.7	-0.732482	5.3899	38.6262	3.32e-06	0.000478541	3.32008
WBGene00019168	H06I04.3	-0.604993	8.33411	38.56	3.36e-06	0.000482878	3.31616
WBGene00012909	spds-1	-0.62882	6.07036	38.5094	3.39e-06	0.000484396	3.3148
WBGene00022566	ZC239.3	-5.08431	-1.95821	38.5164	3.39e-06	0.000484396	3.3148
WBGene00044035	F27E5.7	1.37907	1.98621	39.3575	3.47e-06	0.000493742	3.3065
WBGene00000754	col-181	2.6714	0.799254	54.0996	3.48e-06	0.000494931	3.30546
WBGene00020456	fbxa-60	0.88186	3.50759	38.3375	3.5e-06	0.00049536	3.30508
WBGene00013923	ghi-1	0.908021	3.53812	38.2572	3.55e-06	0.0005012	3.29999
WBGene00012796	Y43F4A.1	-0.678417	6.09844	38.195	3.59e-06	0.000504419	3.29721
WBGene00020481	T13C2.6	-0.673161	7.61057	38.1735	3.6e-06	0.000504419	3.29721
WBGene00044696	F52E1.14	0.662947	5.64771	38.1849	3.6e-06	0.000504419	3.29721
WBGene00008712	F11E6.9	-0.918566	3.70502	37.9021	3.79e-06	0.00052873	3.27677
WBGene00000767	coq-8	-0.555069	7.15033	37.7674	3.89e-06	0.000540464	3.26723
WBGene00006950	wrt-4	-0.769107	6.28864	40.7281	3.93e-06	0.000544993	3.26361
WBGene00020706	atg-9	0.564273	5.35591	37.6659	3.96e-06	0.000547485	3.26163
WBGene00008435	glna-2	0.782823	4.1876	37.5598	4.04e-06	0.000556745	3.25434
WBGene00009477	rbpl-1	-0.698207	7.08058	37.5094	4.08e-06	0.000560339	3.25155
WBGene00006622	try-4	1.43714	2.04257	40.5873	4.14e-06	0.000566091	3.24711
WBGene00011594	T07G12.3	-1.25449	3.99228	52.0751	4.14e-06	0.000566091	3.24711
WBGene00007413	pro-2	-0.576721	7.09152	37.2025	4.32e-06	0.000588196	3.23048
WBGene00020240	T05B4.9	3.80865	-0.0621227	43.6307	4.36e-06	0.000592917	3.22701
WBGene00004894	sms-3	0.699575	4.16459	37.124	4.38e-06	0.000593463	3.22661
WBGene00013693	Y105E8B.9	-0.805296	4.38247	37.0776	4.42e-06	0.000596916	3.22409
WBGene00000514	ckb-4	-0.606147	4.67268	37.0063	4.48e-06	0.000600024	3.22183
WBGene00007536	daf-36	-0.832479	4.29421	37.4943	4.48e-06	0.000600024	3.22183
WBGene00018334	cyp-33E2	-0.738391	3.92537	37.0233	4.46e-06	0.000600024	3.22183
WBGene00003982	pes-9	-0.645636	8.29228	36.9632	4.51e-06	0.000601608	3.22069
WBGene00007048	nfx-1	0.621049	6.48071	36.9597	4.52e-06	0.000601608	3.22069
WBGene00007194	B0491.7	-0.645565	5.13226	36.8368	4.62e-06	0.000613944	3.21187
WBGene00219886	F09E10.15	-1.43897	1.16707	36.8118	4.65e-06	0.000615099	3.21106
WBGene00001636	gly-11	-0.668421	5.0892	36.7031	4.74e-06	0.000626066	3.20338
WBGene00018275	F41C3.11	-0.723861	5.03434	36.6407	4.8e-06	0.000631717	3.19948
WBGene00022021	Y61A9LA.10	-0.577697	7.16534	36.6149	4.82e-06	0.000633028	3.19858
WBGene00013496	Y70D2A.1	1.4218	3.43567	52.3515	4.9e-06	0.000642228	3.19231
WBGene00001608	R07B1.8	1.05351	2.82226	36.4755	4.95e-06	0.000646336	3.18954
WBGene00000516	cki-1	0.689442	4.20866	36.4333	4.99e-06	0.000649712	3.18728
WBGene00013585	cyp-42A1	-0.783752	5.78711	40.1113	5.01e-06	0.000650753	3.18658
WBGene00011556	vglu-3	0.917087	3.06657	36.3838	5.04e-06	0.000652231	3.1856
WBGene00007857	C31H5.6	0.627619	5.54059	36.3492	5.07e-06	0.00065472	3.18394
WBGene00019564	K09D9.1	1.42989	1.62899	36.5876	5.09e-06	0.000655411	3.18349
WBGene00017335	F10D2.10	-1.08083	2.43622	36.2933	5.12e-06	0.000658086	3.18172
WBGene00006948	wrt-2	-1.05231	7.53235	52.2358	5.16e-06	0.000661015	3.17979
WBGene00044514	R09E12.9	-1.21291	3.05113	41.3629	5.18e-06	0.000661459	3.1795
WBGene00000556	cnc-2	-2.3461	-0.501504	36.2201	5.2e-06	0.000661877	3.17922
WBGene00011043	rbm-28	-0.535777	6.9873	36.1827	5.23e-06	0.000664803	3.17731
WBGene00001820	ham-1	0.732785	4.46986	36.0393	5.38e-06	0.000681399	3.1666
WBGene00007559	C14A4.8	-1.93597	0.196384	35.9206	5.5e-06	0.000693297	3.15908
WBGene00013672	catp-1	0.576033	5.47231	35.927	5.5e-06	0.000693297	3.15908
WBGene00045269	F46G11.6	-0.900097	3.2289	35.8979	5.53e-06	0.000694458	3.15835
WBGene00003996	pgp-2	-0.563866	6.77292	35.8541	5.57e-06	0.00069844	3.15587
WBGene00007598	C15A11.4	1.41137	1.21896	35.7419	5.69e-06	0.000709841	3.14884
WBGene00020895	plpp-1.2	-0.589761	4.64469	35.7427	5.69e-06	0.000709841	3.14884
WBGene00022851	ZK1127.4	-0.566923	6.09752	35.7258	5.71e-06	0.000710156	3.14865
WBGene00013082	grdn-1	0.63457	5.24721	35.6472	5.8e-06	0.000717164	3.14438
WBGene00014078	ZK792.5	-0.539505	6.66574	35.6491	5.8e-06	0.000717164	3.14438
WBGene00000820	csp-2	-1.4418	1.05077	35.6103	5.84e-06	0.000720371	3.14244
WBGene00008793	F14D7.6	-0.690905	4.49221	35.5588	5.9e-06	0.000725648	3.13927
WBGene00015326	ivd-1	-0.628465	7.58414	35.5224	5.94e-06	0.000728849	3.13736
WBGene00006404	tag-10	-0.840878	7.46254	41.8871	5.99e-06	0.000733686	3.13449
WBGene00023401	ZK380.t2	-1.65736	0.709925	35.4431	6.03e-06	0.00073489	3.13378
WBGene00044058	F17B5.6	-1.18323	1.9739	35.4391	6.04e-06	0.00073489	3.13378
WBGene00013340	tcc-1	-0.57955	7.89278	35.2646	6.24e-06	0.000758153	3.12024
WBGene00002266	lec-3	0.571557	6.98961	35.2385	6.27e-06	0.000759338	3.11957
WBGene00023427	F14D2.15	-1.79467	-0.202337	35.2298	6.29e-06	0.000759338	3.11957
WBGene00021580	clec-174	-2.55709	-1.00022	35.1914	6.33e-06	0.00076306	3.11744
WBGene00001035	dnj-17	-0.583213	5.42217	35.1729	6.36e-06	0.000763831	3.117
WBGene00017160	F01F1.3	1.14538	2.45798	35.1422	6.39e-06	0.000766437	3.11552
WBGene00004186	prpf-4	-0.544482	6.58585	35.1286	6.41e-06	0.000766496	3.11549
WBGene00219451	F52D2.12	-1.26919	2.43214	37.7945	6.48e-06	0.000773197	3.11171
WBGene00006641	tsp-15	0.725234	4.08688	34.9618	6.62e-06	0.000787759	3.10361
WBGene00019742	nhr-202	-0.801336	3.0224	34.889	6.72e-06	0.000796998	3.09854
WBGene00006351	sur-5	-0.67803	7.41127	34.8736	6.74e-06	0.000797389	3.09833
WBGene00017975	F32B5.1	-1.01615	3.00094	34.7947	6.84e-06	0.000803672	3.09492
WBGene00021589	Y46D2A.1	1.34709	1.25382	34.8001	6.83e-06	0.000803672	3.09492
WBGene00022236	Y73B6BL.12	-2.55479	0.139777	41.1934	6.82e-06	0.000803672	3.09492
WBGene00009431	dct-17	-1.87465	5.03903	84.9759	6.91e-06	0.00080957	3.09175
WBGene00019148	H03E18.1	-0.995058	8.03506	47.4404	7.06e-06	0.00082475	3.08368
WBGene00006947	wrt-1	-0.996852	7.78293	47.8004	7.15e-06	0.000833209	3.07925
WBGene00013481	Y69H2.3	-0.606566	6.80357	34.5595	7.16e-06	0.000833209	3.07925
WBGene00004856	sma-2	-0.743196	3.82923	34.5386	7.19e-06	0.000834578	3.07853
WBGene00007866	C32H11.3	1.7172	0.511693	34.5195	7.22e-06	0.000835646	3.07798
WBGene00010277	F58G6.7	-0.663486	4.72745	34.4687	7.29e-06	0.000841941	3.07472
WBGene00021791	Y51H7C.13	2.19305	0.294548	38.2365	7.38e-06	0.000849924	3.07062
WBGene00006611	tre-5	1.04886	2.80153	34.3688	7.44e-06	0.000851313	3.06991
WBGene00011119	mpc-1	-0.614425	6.39205	34.3627	7.45e-06	0.000851313	3.06991
WBGene00015965	ugt-48	-0.517975	5.89749	34.3647	7.44e-06	0.000851313	3.06991
WBGene00011532	chaf-1	-0.701248	5.11482	34.3475	7.47e-06	0.000851794	3.06967
WBGene00013001	noa-1	-0.573727	5.12815	34.3133	7.52e-06	0.000855459	3.0678
WBGene00002274	lec-11	0.864599	4.48205	38.0063	7.55e-06	0.000856694	3.06717
WBGene00018602	F48D6.4	1.12839	5.16215	52.2128	7.57e-06	0.000856694	3.06717
WBGene00009189	F27D4.4	-0.570117	7.59215	34.2595	7.6e-06	0.000858346	3.06634
WBGene00020784	tat-4	0.717803	5.58417	35.4383	7.75e-06	0.000872728	3.05912
WBGene00019060	acox-3	0.674151	7.1575	34.1351	7.79e-06	0.000873389	3.05879
WBGene00019934	R07C12.4	1.25917	1.13676	34.1448	7.77e-06	0.000873389	3.05879
WBGene00012692	Y39B6A.33	-0.548273	7.29505	34.0488	7.92e-06	0.000886334	3.0524
WBGene00001065	dpy-3	-1.15571	8.00964	53.9231	8.14e-06	0.000908822	3.04152
WBGene00009925	F52B11.2	-0.638444	5.73735	33.8985	8.16e-06	0.000908822	3.04152
WBGene00044630	bus-17	-0.629433	4.35573	33.8753	8.2e-06	0.000910865	3.04055
WBGene00043948	ZC262.7	-1.02107	1.98008	33.8597	8.23e-06	0.000911531	3.04023
WBGene00016970	C56E6.2	-0.81327	3.78137	33.6308	8.61e-06	0.000951834	3.02144
WBGene00189950	C39B5.14	2.78339	-1.19052	33.6038	8.66e-06	0.000954726	3.02012
WBGene00044618	bus-2	-0.887508	2.81496	33.5691	8.72e-06	0.000959128	3.01812
WBGene00001072	dpy-10	-1.30617	8.07934	60.0709	8.76e-06	0.000961692	3.01696
WBGene00019731	M02D8.5	1.21885	1.34693	33.5033	8.83e-06	0.000967289	3.01444
WBGene00020343	acs-3	-0.756642	5.08322	35.6062	8.91e-06	0.000974063	3.01141
WBGene00017719	ldp-1	-0.666582	8.30903	33.4195	8.98e-06	0.000979095	3.00918
WBGene00003062	lpd-6	-0.585498	7.61521	33.3612	9.09e-06	0.000986574	3.00587
WBGene00008506	tkt-1	-0.617981	9.63068	33.3585	9.09e-06	0.000986574	3.00587
WBGene00012635	Y38H8A.1	-0.963282	5.03243	43.8095	9.13e-06	0.000988352	3.00509
WBGene00011978	T24B8.4	0.5106	6.33153	33.3139	9.17e-06	0.000990849	3.00399
WBGene00010015	atad-3	-0.547087	7.67314	33.2972	9.2e-06	0.000991901	3.00353
WBGene00018256	cutl-28	-0.747638	4.52588	33.2577	9.28e-06	0.000997518	3.00108
WBGene00017781	F25E2.3	0.713275	3.63626	33.2456	9.3e-06	0.000997664	3.00102
WBGene00012610	Y38F1A.8	0.756905	4.22654	33.1534	9.48e-06	0.00101403	2.99395
WBGene00044556	F38G1.3	1.03803	2.10651	33.0641	9.65e-06	0.00103012	2.98711
WBGene00019510	K07H8.10	-0.598218	10.4907	33.011	9.75e-06	0.00103886	2.98344
WBGene00012522	Y32B12B.2	-0.564495	5.28643	32.9431	9.89e-06	0.00105083	2.97847
WBGene00015759	C14C6.5	0.875507	6.72039	42.0233	1e-05	0.0010643	2.97294
WBGene00008605	mlt-9	-0.926061	8.17013	42.7205	1.01e-05	0.0010699	2.97066
WBGene00019368	txt-4	0.88028	4.50813	37.7718	1.01e-05	0.0010699	2.97066
WBGene00017420	F13B9.2	-0.766841	4.03932	32.7936	1.02e-05	0.00107342	2.96923
WBGene00018731	F53A9.8	0.768619	3.36529	32.7127	1.04e-05	0.00108876	2.96307
WBGene00011308	pnn-1	-0.518591	5.81187	32.6375	1.05e-05	0.00110307	2.9574
WBGene00010453	fozi-1	0.586186	5.69874	32.6045	1.06e-05	0.00110804	2.95544
WBGene00012451	Y17D7B.3	2.22056	-0.478226	32.5436	1.07e-05	0.00111936	2.95103
WBGene00001073	dpy-11	-0.54142	8.75945	32.4607	1.09e-05	0.0011354	2.94485
WBGene00002090	ins-7	1.91559	-0.297855	32.4413	1.09e-05	0.0011354	2.94485
WBGene00007725	C25F9.5	0.778123	3.41405	32.4456	1.09e-05	0.0011354	2.94485
WBGene00015813	thoc-2	-0.523599	6.62314	32.3476	1.12e-05	0.00115482	2.93749
WBGene00006431	tag-52	0.747158	3.32921	32.2638	1.14e-05	0.00116991	2.93185
WBGene00010485	ant-1.3	2.92569	-1.2696	32.2627	1.14e-05	0.00116991	2.93185
WBGene00016785	C49G7.7	3.25031	-0.550197	39.572	1.15e-05	0.00117794	2.92888
WBGene00001432	fkb-7	-0.8875	3.31835	32.0057	1.2e-05	0.00122798	2.91081
WBGene00012936	pola-1	-0.529612	6.1169	31.945	1.21e-05	0.00124074	2.90632
WBGene00006599	tpa-1	0.532908	6.5462	31.8444	1.24e-05	0.00126128	2.89919
WBGene00007508	C10C5.4	1.78575	1.21069	37.5387	1.24e-05	0.00126128	2.89919
WBGene00015762	C14C6.8	3.8722	-2.02556	31.7591	1.26e-05	0.00127949	2.89296
WBGene00021709	ugt-29	1.77091	5.03727	75.2048	1.26e-05	0.00127949	2.89296
WBGene00014836	T09F5.12	-0.69506	3.90698	31.6735	1.28e-05	0.00129823	2.88665
WBGene00020365	T08G2.2	-0.902144	3.93131	34.5944	1.29e-05	0.00130234	2.88527
WBGene00013151	nsun-5	-0.575999	4.95208	31.6111	1.3e-05	0.00130951	2.88289
WBGene00015752	C14B9.2	-0.65814	8.23414	31.5826	1.31e-05	0.00131446	2.88125
WBGene00004153	pqn-71	1.62772	3.43668	53.8491	1.31e-05	0.00131489	2.88111
WBGene00010867	tag-260	0.632194	5.7095	31.5383	1.32e-05	0.00132095	2.87911
WBGene00000162	apd-3	-0.498899	6.19621	31.5218	1.32e-05	0.00132267	2.87855
WBGene00000560	cnc-6	-5.35942	-1.72763	31.4804	1.33e-05	0.00132332	2.87834
WBGene00001158	ech-9	2.51362	3.51634	80.5344	1.33e-05	0.00132332	2.87834
WBGene00016669	ilys-2	3.21468	1.13355	59.7814	1.33e-05	0.00132332	2.87834
WBGene00020169	mmaa-1	-0.621669	6.87802	31.4786	1.34e-05	0.00132332	2.87834
WBGene00015413	pdhb-1	-0.538023	8.01662	31.436	1.35e-05	0.00133177	2.87557
WBGene00017093	E02C12.8	1.81233	2.18478	45.989	1.35e-05	0.00133177	2.87557
WBGene00007141	pitr-4	-0.991714	2.88402	31.3903	1.36e-05	0.00133941	2.87309
WBGene00021857	iffb-1	-0.561319	8.21989	31.3567	1.37e-05	0.00134599	2.87096
WBGene00017535	atf-8	-1.40211	4.53513	56.1712	1.38e-05	0.00135538	2.86794
WBGene00001399	fat-7	-1.8672	5.32236	79.5545	1.39e-05	0.0013566	2.86755
WBGene00001993	hpd-1	-0.628693	8.19188	31.2795	1.39e-05	0.0013566	2.86755
WBGene00004219	ptr-4	-0.937613	8.37868	41.6565	1.39e-05	0.0013566	2.86755
WBGene00014135	ZK896.4	1.2082	1.5044	31.2953	1.39e-05	0.0013566	2.86755
WBGene00016943	acdh-1	-0.716608	11.2811	31.2763	1.44e-05	0.00139453	2.85557
WBGene00000703	col-129	1.87915	1.49166	40.8108	1.44e-05	0.00139763	2.85461
WBGene00017456	F14D2.8	-3.16841	-1.26392	31.0784	1.45e-05	0.00140184	2.8533
WBGene00021873	clec-82	1.54906	1.5749	33.8998	1.45e-05	0.00140184	2.8533
WBGene00013438	ztf-29	1.00228	3.50879	34.9229	1.49e-05	0.0014312	2.8443
WBGene00018162	nspb-3	2.78892	-0.127905	38.6704	1.49e-05	0.0014312	2.8443
WBGene00018619	F48G7.8	3.22823	2.62442	81.7223	1.49e-05	0.0014312	2.8443
WBGene00017162	ddx-23	-0.510894	6.43335	30.9265	1.5e-05	0.00143393	2.84347
WBGene00003674	nhr-84	0.686584	3.65319	30.8062	1.54e-05	0.00145568	2.83694
WBGene00007024	plin-1	-0.527789	7.00019	30.8013	1.54e-05	0.00145568	2.83694
WBGene00009595	cbp-3	0.690498	5.03466	31.3363	1.54e-05	0.00145568	2.83694
WBGene00012465	Y17G7B.12	-0.547542	5.2338	30.7873	1.54e-05	0.00145568	2.83694
WBGene00016245	rbmx-2	-0.595051	4.52089	30.7783	1.55e-05	0.00145568	2.83694
WBGene00017855	F27C1.6	-0.509146	6.73231	30.7799	1.55e-05	0.00145568	2.83694
WBGene00019931	R07C12.1	1.61323	0.720807	30.7827	1.55e-05	0.00145568	2.83694
WBGene00020054	R13D7.2	-0.556603	4.73656	30.8335	1.53e-05	0.00145568	2.83694
WBGene00009293	F31D4.8	-0.706817	3.66127	30.7453	1.56e-05	0.00146293	2.83478
WBGene00013845	fbxa-37	0.966628	2.58969	30.693	1.57e-05	0.00147341	2.83168
WBGene00045272	F59C12.4	-0.892622	2.73538	30.6926	1.57e-05	0.00147341	2.83168
WBGene00000841	cul-6	0.855571	3.46212	30.6796	1.58e-05	0.0014745	2.83136
WBGene00018294	atg-18	0.503676	5.93243	30.645	1.59e-05	0.00148241	2.82903
WBGene00018992	trpl-1	1.21418	1.17622	30.6297	1.6e-05	0.00148424	2.8285
WBGene00020611	txt-11	1.57619	0.643827	30.6128	1.6e-05	0.00148661	2.8278
WBGene00008877	rtcb-1	-0.55746	4.62065	30.5099	1.64e-05	0.0015104	2.82091
WBGene00014138	clec-186	-0.681262	4.89419	30.6257	1.64e-05	0.0015104	2.82091
WBGene00015632	C09D4.1	-0.652699	5.18944	30.4927	1.64e-05	0.0015104	2.82091
WBGene00021902	oxy-4	-0.577618	4.44784	30.4915	1.64e-05	0.0015104	2.82091
WBGene00271827	T19H12.15	1.37637	1.80512	33.092	1.64e-05	0.0015104	2.82091
WBGene00011182	R09H10.5	-0.555218	8.03867	30.4215	1.67e-05	0.00153005	2.8153
WBGene00002025	hsp-60	-0.545655	9.28106	30.3917	1.68e-05	0.00153376	2.81424
WBGene00016919	C54E4.4	1.03596	2.36843	30.396	1.68e-05	0.00153376	2.81424
WBGene00010827	txt-19	0.620755	4.11955	30.3525	1.69e-05	0.00154361	2.81146
WBGene00011284	ttr-27	0.846569	3.67523	30.8503	1.7e-05	0.00154557	2.81091
WBGene00016577	clec-3	-2.54404	0.395597	40.7963	1.72e-05	0.00156601	2.80521
WBGene00003059	lpd-2	-0.550981	5.29461	30.2056	1.75e-05	0.00157759	2.80201
WBGene00004106	pqn-15	-0.514961	6.01376	30.2107	1.74e-05	0.00157759	2.80201
WBGene00012444	Y15E3A.5	0.884564	4.04145	33.6629	1.75e-05	0.00157759	2.80201
WBGene00009371	F33H2.8	-0.865405	4.08397	33.153	1.76e-05	0.00158069	2.80115
WBGene00020889	T28C12.2	-1.0152	4.75859	42.0637	1.76e-05	0.00158069	2.80115
WBGene00044087	C45H4.18	-7.16169	-2.71499	31.7489	1.81e-05	0.00162171	2.79003
WBGene00016260	rege-1	0.781682	5.19635	34.4775	1.82e-05	0.00162828	2.78827
WBGene00044375	F39E9.14	-6.94249	-2.36729	31.7063	1.82e-05	0.00162899	2.78808
WBGene00007677	C18D4.8	1.82807	0.183544	29.9854	1.83e-05	0.00163248	2.78715
WBGene00016728	C46H11.2	0.7375	4.43128	30.5598	1.83e-05	0.00163248	2.78715
WBGene00022076	daao-1	0.892455	3.41335	30.7147	1.84e-05	0.00163294	2.78703
WBGene00013983	ZK512.2	-0.511763	6.64639	29.9096	1.86e-05	0.00165127	2.78218
WBGene00018380	decr-1.1	1.63689	0.431695	29.8941	1.87e-05	0.00165127	2.78218
WBGene00022853	ZK1127.6	-0.547484	5.17321	29.8997	1.86e-05	0.00165127	2.78218
WBGene00021514	Y41D4B.11	-0.724238	6.32639	33.5416	1.89e-05	0.0016662	2.77827
WBGene00008484	E04D5.5	-0.874965	2.55188	29.7998	1.91e-05	0.00167876	2.77501
WBGene00015141	ugt-46	-0.514974	6.85718	29.7605	1.92e-05	0.00168869	2.77245
WBGene00019380	K04C2.2	-0.495906	7.39196	29.755	1.92e-05	0.00168869	2.77245
WBGene00016411	C34E10.10	-0.580457	4.74892	29.7184	1.94e-05	0.00169891	2.76983
WBGene00004764	sel-7	0.769813	4.25181	30.6514	1.96e-05	0.00171132	2.76667
WBGene00021124	W10C4.1	0.887215	2.21697	29.5916	1.99e-05	0.00173957	2.75956
WBGene00009678	magu-4	-0.591858	5.91402	29.5561	2.01e-05	0.00174971	2.75703
WBGene00013207	zipt-2.3	-1.03533	2.30572	29.5435	2.01e-05	0.00175126	2.75665
WBGene00019005	F57B10.8	-0.574059	4.84832	29.3911	2.08e-05	0.00180672	2.74311
WBGene00012869	Y45F10A.7	0.891518	3.4209	30.2552	2.09e-05	0.00181396	2.74137
WBGene00219758	linc-11	-4.95218	1.82989	82.5182	2.1e-05	0.00181707	2.74063
WBGene00009877	F49C12.7	2.63742	5.55875	99.8914	2.16e-05	0.0018596	2.73058
WBGene00022156	Y71G12B.18	3.05787	-0.360531	37.2931	2.16e-05	0.0018596	2.73058
WBGene00004277	rab-18	0.47648	5.95971	29.1734	2.18e-05	0.00187356	2.72733
WBGene00008412	D2030.2	0.554217	6.09606	29.1738	2.18e-05	0.00187356	2.72733
WBGene00006986	zip-1	0.550709	4.68557	29.1255	2.21e-05	0.00188978	2.72359
WBGene00012127	T28D6.7	-0.563886	5.6021	29.0657	2.23e-05	0.00191116	2.7187
WBGene00022591	cuti-1	-0.776283	6.20346	35.0026	2.25e-05	0.00192113	2.71644
WBGene00018286	F41E6.5	0.843802	3.31541	29.0107	2.26e-05	0.00192727	2.71506
WBGene00001028	dnj-10	-0.474566	6.53038	28.9842	2.27e-05	0.00193496	2.71333
WBGene00000969	dhs-5	-0.694944	5.67288	31.342	2.29e-05	0.00194804	2.7104
WBGene00017765	gcst-1	-0.487381	7.44447	28.9091	2.31e-05	0.00195995	2.70776
WBGene00010285	F58H1.2	-0.58079	4.70866	28.889	2.32e-05	0.00196275	2.70714
WBGene00016863	cest-35.2	1.90233	1.61795	40.4345	2.33e-05	0.00196275	2.70714
WBGene00022567	ZC239.4	-3.72306	-1.15079	31.5791	2.33e-05	0.00196275	2.70714
WBGene00000220	atf-2	-1.07669	5.57916	45.4506	2.35e-05	0.00197461	2.70452
WBGene00009466	F36D1.7	1.04724	1.82586	28.8261	2.35e-05	0.00197461	2.70452
WBGene00010813	pitp-1	0.578858	5.77798	28.8184	2.36e-05	0.00197461	2.70452
WBGene00011184	R09H10.7	-1.12306	1.30404	28.8179	2.36e-05	0.00197461	2.70452
WBGene00003119	mac-1	-0.492157	6.53026	28.751	2.39e-05	0.00200016	2.69893
WBGene00013841	fbxa-33	1.20773	1.3116	28.7432	2.4e-05	0.00200016	2.69893
WBGene00043053	F47H4.12	1.83605	-0.232639	28.7227	2.41e-05	0.00200564	2.69775
WBGene00000955	des-2	0.603557	4.11087	28.7021	2.42e-05	0.0020112	2.69655
WBGene00000757	col-184	1.42338	0.913311	28.6755	2.43e-05	0.00201943	2.69477
WBGene00007120	B0250.3	-0.81258	6.5319	36.0039	2.46e-05	0.00203893	2.6906
WBGene00194717	ZC239.22	-3.45507	-1.60367	28.5834	2.48e-05	0.00205361	2.68748
WBGene00016335	gba-1	0.559211	5.55899	28.5699	2.49e-05	0.00205611	2.68695
WBGene00015593	C08E3.1	-3.49955	0.156904	32.4321	2.53e-05	0.00208271	2.68137
WBGene00008583	ugt-65	-0.582041	5.97383	28.4755	2.54e-05	0.00209213	2.67941
WBGene00001451	flp-8	0.590749	4.81569	28.465	2.55e-05	0.00209332	2.67916
WBGene00022261	clec-210	-1.77347	1.72522	38.0071	2.56e-05	0.00209537	2.67874
WBGene00002007	hsp-3	-0.580847	10.934	28.3865	2.59e-05	0.00211462	2.67477
WBGene00002393	lpr-1	-0.964928	4.76484	38.6531	2.59e-05	0.00211462	2.67477
WBGene00018802	F54D8.6	-0.530427	6.32515	28.3869	2.59e-05	0.00211462	2.67477
WBGene00019520	K08B12.1	-0.773685	6.67551	34.3171	2.6e-05	0.00211462	2.67477
WBGene00020747	T24A6.7	1.86306	-0.0790434	28.3197	2.63e-05	0.00213687	2.67022
WBGene00022743	mlt-7	1.36767	6.99458	56.8072	2.63e-05	0.00213687	2.67022
WBGene00018257	F41B4.1	0.600613	4.56508	28.2613	2.67e-05	0.0021598	2.66559
WBGene00013980	dos-1	1.16028	1.44981	28.2421	2.68e-05	0.00216533	2.66448
WBGene00011681	T10B10.4	0.553547	5.7311	28.2043	2.7e-05	0.00217986	2.66157
WBGene00014173	ZK970.7	-2.45659	2.87027	61.3049	2.71e-05	0.00218669	2.66021
WBGene00012858	Y44F5A.1	-0.543761	5.02758	28.1654	2.73e-05	0.00219009	2.65954
WBGene00021249	Y22D7AL.11	-0.820967	3.09689	28.1602	2.73e-05	0.00219009	2.65954
WBGene00022568	ZC239.5	-1.45614	0.562928	28.137	2.74e-05	0.00219764	2.65804
WBGene00012634	Y38H6C.23	-1.59546	0.311497	28.1121	2.76e-05	0.00220237	2.65711
WBGene00016987	CC8.2	-1.01018	4.78632	40.026	2.76e-05	0.00220237	2.65711
WBGene00007509	C10C5.5	3.00704	-0.898462	31.503	2.77e-05	0.00221183	2.65525
WBGene00019973	R09A1.3	-0.787505	3.14979	28.0773	2.78e-05	0.00221198	2.65522
WBGene00021847	Y54F10AL.1	-0.485027	5.8173	28.0383	2.8e-05	0.00222757	2.65217
WBGene00001259	emb-5	-0.474601	7.76328	27.9788	2.84e-05	0.00225026	2.64777
WBGene00011748	T13F2.9	2.96608	-1.96656	27.9778	2.84e-05	0.00225026	2.64777
WBGene00044631	bus-18	-0.833546	3.6912	28.9869	2.85e-05	0.00225254	2.64733
WBGene00011099	nhr-208	1.19586	0.881024	27.9476	2.86e-05	0.00225786	2.6463
WBGene00020902	jmjc-1	-0.517205	6.60869	27.9259	2.88e-05	0.00226129	2.64564
WBGene00021156	Y4C6B.2	1.96272	2.45227	47.7683	2.87e-05	0.00226129	2.64564
WBGene00004892	sms-1	0.502073	5.56271	27.8395	2.93e-05	0.00230161	2.63797
WBGene00004185	pro-1	-0.493697	5.59762	27.8091	2.95e-05	0.00231349	2.63573
WBGene00008726	F13A7.11	1.18971	1.6905	27.7438	3e-05	0.00234199	2.63041
WBGene00014137	clec-187	-0.645085	4.02279	27.7398	3e-05	0.00234199	2.63041
WBGene00014046	clec-60	2.19692	3.19583	57.1052	3.11e-05	0.00242657	2.61501
WBGene00003675	nhr-85	0.579087	3.93244	27.5535	3.13e-05	0.00243021	2.61436
WBGene00009706	argk-1	-3.05131	3.51592	82.1213	3.12e-05	0.00243021	2.61436
WBGene00020413	cpg-22	0.896865	4.05756	32.2386	3.14e-05	0.00243418	2.61365
WBGene00015168	pdi-6	-0.554999	9.36719	27.5258	3.15e-05	0.00243737	2.61308
WBGene00002850	let-716	-0.493609	7.7601	27.5016	3.16e-05	0.00244126	2.61239
WBGene00008934	F18C12.3	-0.517946	5.87558	27.5111	3.16e-05	0.00244126	2.61239
WBGene00012175	W01C9.1	-1.26587	1.35434	27.4968	3.17e-05	0.00244126	2.61239
WBGene00016788	C49G7.10	2.37031	3.25347	64.7954	3.18e-05	0.00244723	2.61132
WBGene00012593	nspe-7	-1.33184	1.06865	27.4678	3.19e-05	0.00244927	2.61096
WBGene00000133	amt-1	1.63154	0.823567	29.6996	3.23e-05	0.00248145	2.60529
WBGene00001262	emb-8	-0.486721	7.23098	27.333	3.29e-05	0.00251696	2.59912
WBGene00002021	hsp-17	-0.523228	5.5885	27.3147	3.3e-05	0.00252329	2.59803
WBGene00022571	ZC239.13	-6.24688	-2.12145	28.7436	3.31e-05	0.00252475	2.59778
WBGene00007731	C25G4.3	-0.613027	3.87326	27.2436	3.35e-05	0.00255599	2.59244
WBGene00019154	glf-1	-0.683541	7.95931	29.441	3.36e-05	0.00255981	2.59179
WBGene00015298	C01F1.3	-0.889838	7.41838	37.0229	3.46e-05	0.00262988	2.58006
WBGene00016094	C25E10.4	-0.765797	2.91745	27.0705	3.49e-05	0.00264583	2.57744
WBGene00002637	let-418	-0.517068	7.87317	27.0387	3.51e-05	0.00266082	2.57498
WBGene00004210	ptc-3	-0.685578	8.58102	28.9748	3.55e-05	0.00268363	2.57128
WBGene00009246	gfm-1	-0.505522	8.1102	26.9557	3.58e-05	0.00270301	2.56815
WBGene00001760	gst-12	1.3078	3.38832	39.189	3.61e-05	0.00271981	2.56546
WBGene00020847	cgr-1	-0.503632	5.98509	26.9165	3.61e-05	0.00271981	2.56546
WBGene00009626	F42A8.1	-0.703746	4.59611	28.0194	3.64e-05	0.00273208	2.56351
WBGene00012834	Y43F8C.13	-0.527982	5.91776	26.8863	3.64e-05	0.00273208	2.56351
WBGene00011548	T06G6.6	-0.916044	6.31027	38.2624	3.67e-05	0.00274506	2.56145
WBGene00010136	F55H12.5	1.59044	-0.244863	26.839	3.68e-05	0.00274961	2.56073
WBGene00020962	W02H5.8	-0.583191	3.99387	26.8245	3.69e-05	0.00275436	2.55998
WBGene00021876	Y54G2A.11	1.08373	5.30091	42.7045	3.71e-05	0.00276405	2.55845
WBGene00007904	C33G3.4	-0.546473	4.76847	26.7879	3.72e-05	0.00276876	2.55772
WBGene00011634	T09A5.5	-0.519987	5.40967	26.7623	3.74e-05	0.00277858	2.55618
WBGene00011671	cyp-13A4	-1.56183	-0.313996	26.7518	3.75e-05	0.00277858	2.55618
WBGene00021597	spsb-1	0.547782	5.97783	26.7535	3.75e-05	0.00277858	2.55618
WBGene00008014	fbxa-172	3.79284	-2.16998	26.6929	3.8e-05	0.00279879	2.55303
WBGene00010425	lpin-1	-0.530071	7.35672	26.7081	3.79e-05	0.00279879	2.55303
WBGene00016319	C32D5.12	-0.699532	4.91846	28.7377	3.79e-05	0.00279879	2.55303
WBGene00019272	H42K12.3	-1.04747	8.32473	41.2569	3.8e-05	0.00279879	2.55303
WBGene00019124	F59E12.9	-0.491257	6.06558	26.6486	3.84e-05	0.00282303	2.54928
WBGene00003888	osm-8	-0.933092	4.72539	35.7647	3.85e-05	0.00282318	2.54926
WBGene00008354	gcsh-1	-0.529525	5.13114	26.6348	3.85e-05	0.00282318	2.54926
WBGene00003229	mex-3	0.493485	5.08058	26.6062	3.88e-05	0.00283738	2.54708
WBGene00013292	Y57G11A.4	0.632425	4.72051	26.598	3.89e-05	0.00283833	2.54694
WBGene00000422	ced-8	-1.36652	0.603307	26.591	3.89e-05	0.00283844	2.54692
WBGene00001243	elo-5	-0.553582	7.39143	26.5765	3.91e-05	0.00284357	2.54614
WBGene00018928	F56B3.2	-0.500577	5.1306	26.5435	3.94e-05	0.00286083	2.54351
WBGene00020999	W03F9.1	-0.458848	6.47534	26.4774	4e-05	0.00289588	2.53822
WBGene00022611	ZC449.1	-0.972508	5.47031	38.8401	3.99e-05	0.00289588	2.53822
WBGene00020140	ant-1.4	3.09981	-1.81532	26.4315	4.04e-05	0.00292222	2.53429
WBGene00021797	plep-1	2.24945	-1.13664	26.4219	4.05e-05	0.00292421	2.53399
WBGene00044121	gcp-2.3	2.43495	-1.52604	26.4127	4.06e-05	0.00292594	2.53373
WBGene00011429	T04C12.7	1.56796	0.145578	26.344	4.12e-05	0.00296829	2.52749
WBGene00000136	amt-4	-1.10569	5.7734	44.0101	4.17e-05	0.00299993	2.52289
WBGene00016197	pxl-1	0.575144	5.98849	26.2391	4.22e-05	0.00303211	2.51825
WBGene00001076	dpy-17	-1.88542	1.54704	36.3949	4.24e-05	0.00303702	2.51755
WBGene00007481	C09F9.4	-1.45198	1.00114	26.6065	4.26e-05	0.00304993	2.51571
WBGene00010350	H01G02.3	0.758928	2.94293	26.1766	4.29e-05	0.00306239	2.51394
WBGene00002891	let-767	-0.473695	8.4392	26.1483	4.31e-05	0.00307795	2.51174
WBGene00005003	spp-18	0.664384	4.06337	26.0935	4.37e-05	0.0031127	2.50686
WBGene00004002	pgp-8	-1.14729	1.55521	26.0333	4.43e-05	0.00315192	2.50143
WBGene00011622	T08G5.1	2.21127	-0.980809	25.9887	4.48e-05	0.00318008	2.49756
WBGene00000623	col-46	-0.873931	5.20815	34.3691	4.58e-05	0.00323028	2.49076
WBGene00007969	acs-19	-0.52181	7.79503	25.9037	4.57e-05	0.00323028	2.49076
WBGene00019449	K06H6.1	2.74601	-1.50801	25.8959	4.58e-05	0.00323028	2.49076
WBGene00020972	trpl-2	-0.675708	3.35682	25.9049	4.57e-05	0.00323028	2.49076
WBGene00077764	F59C6.16	1.66213	1.83535	34.3486	4.59e-05	0.00323485	2.49015
WBGene00015688	C10G11.8	4.71812	-2.14669	27.0454	4.6e-05	0.00323585	2.49001
WBGene00002195	kin-9	0.949113	2.57247	25.848	4.63e-05	0.00325203	2.48785
WBGene00017663	F21D12.3	0.675626	5.39329	28.1176	4.65e-05	0.00326054	2.48671
WBGene00015941	C18A3.3	-0.501975	6.94737	25.8217	4.66e-05	0.00326234	2.48647
WBGene00022329	fbxa-79	0.97742	2.59029	26.2271	4.68e-05	0.00327527	2.48475
WBGene00003096	lys-7	1.81573	6.73536	66.9599	4.69e-05	0.00327796	2.4844
WBGene00016760	C49A9.6	-0.593777	4.24875	25.78	4.7e-05	0.00327972	2.48416
WBGene00006677	twk-24	0.640363	3.5324	25.7289	4.76e-05	0.00331437	2.4796
WBGene00022176	Y71H2AM.11	-0.505509	7.02261	25.7226	4.77e-05	0.00331437	2.4796
WBGene00010435	JC8.2	-0.477109	6.90413	25.6298	4.87e-05	0.00338245	2.47077
WBGene00010730	ensa-1	0.459071	6.04185	25.6154	4.89e-05	0.00338896	2.46993
WBGene00021899	Y54H5A.1	-0.465144	7.26208	25.6062	4.9e-05	0.00339129	2.46964
WBGene00010976	R02D5.1	0.668718	3.60656	25.5858	4.92e-05	0.00340257	2.46819
WBGene00004124	pqn-37	0.955308	5.00623	36.3656	4.93e-05	0.00340493	2.46789
WBGene00016028	flp-24	0.505449	5.06551	25.5075	5.01e-05	0.00345084	2.46208
WBGene00022148	ddx-27	-0.47799	7.10446	25.5074	5.01e-05	0.00345084	2.46208
WBGene00020781	T24H7.2	-0.480921	7.39075	25.4574	5.07e-05	0.00348667	2.45759
WBGene00010238	F58B4.5	-0.845861	5.1876	33.0381	5.09e-05	0.00349057	2.4571
WBGene00022577	nstp-3	-0.65545	4.72495	26.0558	5.15e-05	0.00352816	2.45245
WBGene00004978	spg-7	-0.475836	7.57172	25.3672	5.18e-05	0.00354635	2.45022
WBGene00302978	C42C1.19	-0.581156	3.99964	25.3543	5.2e-05	0.003552	2.44953
WBGene00044107	F58G6.9	-1.05145	4.48458	36.9312	5.25e-05	0.00358009	2.44611
WBGene00012628	Y38H6C.16	-0.612131	3.97048	25.3067	5.26e-05	0.00358183	2.44589
WBGene00014294	C53C7.5	-0.562868	6.90266	25.2872	5.28e-05	0.00359094	2.44479
WBGene00019404	K05B2.4	0.737086	4.51693	27.7659	5.29e-05	0.00359094	2.44479
WBGene00019481	cogc-6	-0.505395	6.19969	25.2482	5.33e-05	0.00361616	2.44175
WBGene00018045	F35D11.4	-0.5516	4.827	25.1944	5.4e-05	0.00365738	2.43683
WBGene00001109	dsl-7	0.977757	1.6437	25.1809	5.42e-05	0.00366387	2.43606
WBGene00022573	ZC239.15	-1.16835	1.06922	25.1541	5.45e-05	0.00368193	2.43392
WBGene00019939	lips-17	1.66005	3.40745	45.7805	5.47e-05	0.00368778	2.43323
WBGene00016645	C44C1.6	-2.18391	1.86334	40.6549	5.53e-05	0.00372458	2.42892
WBGene00010859	M04C9.4	-0.836951	2.29626	25.078	5.55e-05	0.00373318	2.42792
WBGene00021605	Y46H3C.5	-1.53277	0.146177	25.0222	5.63e-05	0.00377775	2.42277
WBGene00008929	F18A11.2	-0.59842	4.95898	25.016	5.63e-05	0.00377796	2.42274
WBGene00003074	lars-2	-0.467491	6.03755	24.9914	5.67e-05	0.00378937	2.42143
WBGene00010897	lact-3	0.609065	5.48232	25.5608	5.67e-05	0.00378937	2.42143
WBGene00020809	T25G12.1	-0.89436	1.72063	24.9697	5.7e-05	0.00379828	2.42041
WBGene00021435	Y39A3A.4	1.55	0.149944	24.9755	5.69e-05	0.00379828	2.42041
WBGene00001064	dpy-2	-1.09905	8.37073	40.8706	5.72e-05	0.0038056	2.41958
WBGene00010988	metr-1	-0.551363	9.18649	24.9514	5.72e-05	0.0038056	2.41958
WBGene00194815	Y43F8B.23	1.63022	-0.284928	24.9402	5.74e-05	0.00380887	2.4192
WBGene00008567	acox-1.4	-0.569367	5.85154	24.897	5.8e-05	0.00384305	2.41532
WBGene00020349	T08B2.11	-1.50871	0.746204	25.5263	5.81e-05	0.00384963	2.41458
WBGene00044433	W10C8.6	1.35174	0.898218	24.8396	5.88e-05	0.0038852	2.41059
WBGene00004226	ptr-12	0.694742	5.81275	28.5953	5.92e-05	0.00390105	2.40882
WBGene00021522	nhr-274	0.596799	4.90734	24.8111	5.92e-05	0.00390105	2.40882
WBGene00008731	F13B12.3	0.831932	3.09571	24.7972	5.94e-05	0.00390839	2.408
WBGene00020717	mrpl-4	-0.505482	5.81586	24.7174	6.05e-05	0.00397847	2.40028
WBGene00000984	dhs-21	0.601081	4.85937	24.6294	6.18e-05	0.00405793	2.3917
WBGene00000669	col-94	-1.79098	-0.0450653	25.1222	6.32e-05	0.00414389	2.38259
WBGene00023209	ZC513.7	-0.619594	7.77676	25.6337	6.39e-05	0.0041828	2.37853
WBGene00022868	ZK1240.3	-0.610923	3.56852	24.4852	6.4e-05	0.00418397	2.37841
WBGene00017450	bath-27	-1.975	-0.490607	24.449	6.46e-05	0.00421484	2.37522
WBGene00014000	ZK550.6	0.533202	6.25875	24.4273	6.49e-05	0.00422993	2.37367
WBGene00015410	tbc-6	0.625339	3.84343	24.4113	6.52e-05	0.00422993	2.37367
WBGene00016757	C49A9.3	-0.528729	4.52898	24.4126	6.51e-05	0.00422993	2.37367
WBGene00022227	Y73B3B.5	-0.685359	3.30263	24.4137	6.51e-05	0.00422993	2.37367
WBGene00003726	nhr-136	0.861739	3.56975	26.8084	6.58e-05	0.00425546	2.37105
WBGene00015525	rha-2	-0.51206	6.04707	24.3664	6.59e-05	0.00425546	2.37105
WBGene00016705	slcr-46.1	-0.518205	4.53375	24.3636	6.59e-05	0.00425546	2.37105
WBGene00022458	prp-31	-0.449363	6.16743	24.3768	6.57e-05	0.00425546	2.37105
WBGene00012970	Y48A6B.9	0.638497	4.27928	24.3563	6.6e-05	0.00425718	2.37088
WBGene00195179	F48C1.11	-6.9923	-2.5903	25.518	6.63e-05	0.00426644	2.36993
WBGene00013129	Y52B11A.10	-0.446773	5.85095	24.3271	6.65e-05	0.00427565	2.369
WBGene00011838	T19C4.1	-0.62389	5.58487	25.6681	6.72e-05	0.00431339	2.36518
WBGene00018562	F47D12.6	0.637878	3.55039	24.2788	6.73e-05	0.00431424	2.3651
WBGene00015019	B0205.4	-0.90746	3.66311	28.1947	6.74e-05	0.00431488	2.36503
WBGene00011136	R08A2.5	1.1513	1.54198	24.2609	6.76e-05	0.00432126	2.36439
WBGene00011971	lron-9	-0.578816	6.93865	24.5742	6.83e-05	0.00434721	2.36179
WBGene00018540	btb-21	1.00804	1.84088	24.2162	6.83e-05	0.00434721	2.36179
WBGene00021978	Y58A7A.4	2.5839	1.92528	47.8983	6.83e-05	0.00434721	2.36179
WBGene00022862	ZK1236.1	-0.476922	4.90733	24.2278	6.81e-05	0.00434721	2.36179
WBGene00016172	C27H5.2	-0.531024	5.29838	24.1581	6.93e-05	0.00440064	2.35648
WBGene00195176	Y43F8B.24	1.27268	1.49409	25.31	6.98e-05	0.0044268	2.35391
WBGene00000035	ace-1	0.544625	4.5498	24.1108	7.01e-05	0.00443622	2.35299
WBGene00008495	F01D5.5	0.582045	5.27788	24.1083	7.01e-05	0.00443622	2.35299
WBGene00021801	Y53G8AL.3	-7.32923	-3.02359	25.254	7.03e-05	0.00444116	2.3525
WBGene00015481	C05D11.1	-0.440332	7.84234	24.0927	7.04e-05	0.00444122	2.3525
WBGene00015839	math-10	2.38094	-1.31605	23.9942	7.21e-05	0.00454318	2.34264
WBGene00011430	T04C12.8	0.973213	2.188	23.9724	7.25e-05	0.00456135	2.34091
WBGene00011979	sysm-1	1.42706	2.69075	33.6901	7.28e-05	0.00457692	2.33943
WBGene00013680	rpom-1	-0.431437	6.07441	23.9356	7.31e-05	0.00459021	2.33817
WBGene00003574	ncx-9	1.43561	-0.0100419	23.9055	7.37e-05	0.00461804	2.33554
WBGene00011128	adk-1	-0.502475	9.40685	23.8942	7.39e-05	0.00462471	2.33492
WBGene00010321	F59B10.5	-0.553561	4.69143	23.72	7.71e-05	0.00482035	2.31692
WBGene00019515	ugt-19	-1.22561	3.86351	36.5601	7.77e-05	0.00484772	2.31446
WBGene00012908	Y46G5A.18	-0.48718	5.4803	23.6836	7.78e-05	0.00484875	2.31437
WBGene00020574	T19D7.6	-0.83918	2.61285	23.6799	7.79e-05	0.00484875	2.31437
WBGene00016218	pals-23	1.10238	4.04573	34.305	7.8e-05	0.00485057	2.31421
WBGene00000694	col-120	2.22244	0.0163369	28.5643	7.87e-05	0.00488698	2.31096
WBGene00008341	ttr-44	0.938786	5.46064	34.6526	7.97e-05	0.00494239	2.30606
WBGene00014052	ZK669.2	-0.699575	3.61844	23.5051	8.13e-05	0.0050357	2.29794
WBGene00000609	col-20	3.09094	0.669551	41.5229	8.19e-05	0.00505657	2.29614
WBGene00022794	snu-23	-0.526112	4.85275	23.4828	8.18e-05	0.00505657	2.29614
WBGene00011407	ppat-1	-0.570476	3.81008	23.4652	8.21e-05	0.0050656	2.29537
WBGene00021502	Y40D12A.1	0.553682	3.92799	23.403	8.34e-05	0.00513737	2.28926
WBGene00021081	pals-33	1.86462	-0.880645	23.3748	8.4e-05	0.00516666	2.28679
WBGene00007302	C04F12.8	0.546948	4.27146	23.3599	8.43e-05	0.00517229	2.28632
WBGene00017761	F23H11.6	1.21302	2.32706	27.7564	8.42e-05	0.00517229	2.28632
WBGene00000547	clp-7	-0.466621	6.89665	23.3515	8.45e-05	0.00517622	2.28599
WBGene00003941	pbo-1	-0.503439	5.41176	23.3409	8.47e-05	0.00518306	2.28541
WBGene00021519	Y41D4B.17	-1.00515	3.05292	26.7968	8.49e-05	0.00519096	2.28475
WBGene00007849	tbc-19	0.696231	2.94529	23.3149	8.52e-05	0.00520306	2.28374
WBGene00006927	vit-3	3.70437	-0.267186	37.5096	8.56e-05	0.00521759	2.28253
WBGene00019760	calu-1	-0.561906	8.96136	23.2868	8.58e-05	0.00522601	2.28183
WBGene00001049	dog-1	-0.479472	4.77499	23.2486	8.67e-05	0.00526903	2.27827
WBGene00009888	F49E2.5	-0.517627	9.6549	23.2361	8.69e-05	0.00527854	2.27749
WBGene00012853	Y44A6D.2	0.503486	5.86625	23.2288	8.71e-05	0.00528136	2.27725
WBGene00009438	F35G2.5	-0.779107	2.45944	23.2095	8.75e-05	0.00528617	2.27686
WBGene00011952	T23F6.5	-0.773586	2.44733	23.2141	8.74e-05	0.00528617	2.27686
WBGene00022024	Y64H9A.2	-0.564773	4.41448	23.2169	8.73e-05	0.00528617	2.27686
WBGene00000005	aat-4	-0.623564	3.75073	23.188	8.8e-05	0.00530782	2.27508
WBGene00018893	wdr-12	-0.447648	6.33453	23.1738	8.83e-05	0.00531972	2.27411
WBGene00021686	nsun-2	-0.431065	7.39725	23.1356	8.91e-05	0.00536372	2.27053
WBGene00010033	F54B11.10	-0.883954	3.24979	25.032	8.95e-05	0.00538036	2.26919
WBGene00016844	sucg-1	-0.44372	6.64044	23.1077	8.98e-05	0.00538056	2.26917
WBGene00020224	T05A7.7	1.00816	1.34848	23.1124	8.97e-05	0.00538056	2.26917
WBGene00015227	ddn-1	1.1528	1.27883	23.0696	9.06e-05	0.00542507	2.26559
WBGene00011443	cutl-11	0.8477	2.1085	23.0571	9.09e-05	0.00543505	2.2648
WBGene00011665	T09F5.1	-0.786308	3.01448	23.0274	9.16e-05	0.00546856	2.26213
WBGene00007682	C18D11.6	-2.81054	-1.78586	23.0081	9.2e-05	0.00548799	2.26059
WBGene00008553	F07C6.2	-0.816928	1.8756	22.9642	9.3e-05	0.0055417	2.25636
WBGene00003903	pab-2	-0.465142	7.40652	22.9575	9.32e-05	0.00554386	2.25619
WBGene00001244	elo-6	-0.521637	8.53649	22.9508	9.34e-05	0.00554519	2.25608
WBGene00007050	utp-20	-0.473476	7.0617	22.9465	9.35e-05	0.00554519	2.25608
WBGene00020600	trd-1	-0.469255	6.35174	22.9285	9.39e-05	0.00556318	2.25468
WBGene00017997	mrpl-1	-0.4258	6.47972	22.8924	9.47e-05	0.00560667	2.2513
WBGene00000557	cnc-3	-0.726418	4.7802	26.472	9.62e-05	0.00567409	2.2461
WBGene00011288	R102.1	1.30719	0.414916	22.8307	9.62e-05	0.00567409	2.2461
WBGene00015968	C18C4.7	-0.533426	7.00398	22.8315	9.62e-05	0.00567409	2.2461
WBGene00000114	alh-8	-0.513992	10.4823	22.7934	9.71e-05	0.00571565	2.24293
WBGene00001506	fut-2	0.72205	2.63917	22.7907	9.72e-05	0.00571565	2.24293
WBGene00007184	ctr-9	-0.459829	6.86893	22.7307	9.87e-05	0.00579535	2.23692
WBGene00003963	pdi-2	-0.526315	11.619	22.7068	9.93e-05	0.00582308	2.23485
WBGene00013080	Y51A2D.13	0.472313	5.76663	22.6872	9.97e-05	0.00584462	2.23324
WBGene00002073	ima-2	-0.479978	6.98652	22.6776	0.0001	0.00584586	2.23315
WBGene00009663	hda-5	0.852843	2.58832	22.6715	0.000100143	0.00584586	2.23315
WBGene00021660	nol-14	-0.419727	6.3995	22.6722	0.000100125	0.00584586	2.23315
WBGene00015555	ufl-1	-0.422749	6.61602	22.6415	0.000100905	0.00588301	2.2304
WBGene00005444	srh-237	-0.747545	2.76311	22.6349	0.000101073	0.00588547	2.23022
WBGene00018890	F55F8.2	-0.431168	6.6414	22.5905	0.000102212	0.00594439	2.22589
WBGene00007174	mboa-1	-0.64529	5.62353	25.082	0.000103584	0.00600983	2.22114
WBGene00009469	F36D3.1	-0.679169	4.02618	22.789	0.000103594	0.00600983	2.22114
WBGene00009642	F42G4.5	-0.648431	3.46561	22.5263	0.000103886	0.00601933	2.22045
WBGene00009572	F40D4.13	1.64866	-0.532848	22.5095	0.000104329	0.00603013	2.21967
WBGene00010500	K02B12.7	-0.431018	6.28354	22.5111	0.000104286	0.00603013	2.21967
WBGene00001816	haf-6	-0.443397	5.28744	22.4823	0.000105049	0.00606427	2.21722
WBGene00002696	let-504	-0.518588	5.80882	22.4595	0.000105658	0.00609192	2.21525
WBGene00007460	C08F11.13	0.828108	4.58889	28.3151	0.000105919	0.00609942	2.21471
WBGene00017542	F17E9.5	3.50768	-2.14953	22.4322	0.000106394	0.00611745	2.21343
WBGene00219691	linc-106	-6.23953	-2.70115	23.447	0.000106493	0.00611745	2.21343
WBGene00015577	ugt-64	-0.498746	5.23497	22.3978	0.000107326	0.00615779	2.21057
WBGene00044325	tag-321	0.524316	4.03204	22.3882	0.000107587	0.0061652	2.21005
WBGene00001914	his-40	1.48537	-0.0561165	22.2745	0.000110744	0.00633062	2.19855
WBGene00009842	igeg-2	0.731031	2.65757	22.2781	0.000110643	0.00633062	2.19855
WBGene00014185	ZK1025.5	-1.48894	0.237257	22.2558	0.000111272	0.0063531	2.19701
WBGene00015760	C14C6.6	4.26886	-2.23998	22.3009	0.000111519	0.00635946	2.19658
WBGene00003731	nhx-3	0.651016	4.51205	23.2253	0.000111744	0.00636453	2.19623
WBGene00013730	sql-1	-0.461556	6.41966	22.1975	0.00011294	0.00642485	2.19214
WBGene00013088	Y51B9A.6	-0.752002	2.71699	22.1915	0.000113113	0.0064269	2.192
WBGene00016664	C45E5.1	-0.665585	4.60481	23.8118	0.000113748	0.00645513	2.1901
WBGene00003544	nas-25	1.4442	2.297	30.1865	0.000114432	0.0064861	2.18802
WBGene00007236	C01G10.9	-0.462142	4.6569	22.083	0.000116294	0.00657299	2.18224
WBGene00012163	VZK822L.2	-0.794571	2.39775	22.065	0.00011683	0.00657299	2.18224
WBGene00014801	K08E5.1	-0.943749	1.71494	22.0659	0.000116802	0.00657299	2.18224
WBGene00020649	sma-10	0.827059	5.32925	29.5215	0.000116939	0.00657299	2.18224
WBGene00021284	Y24D9A.6	-4.16796	-2.53761	22.0662	0.000116795	0.00657299	2.18224
WBGene00021629	scpl-3	0.536074	4.42935	22.0878	0.000116149	0.00657299	2.18224
WBGene00044811	F12E12.11	-1.44118	2.92043	33.6993	0.000116947	0.00657299	2.18224
WBGene00016499	txt-5	0.783739	2.61365	22.0395	0.000117597	0.00660161	2.18035
WBGene00008829	cyp-35D1	-2.48822	2.29342	45.8796	0.000118035	0.00661831	2.17925
WBGene00022865	ufbp-1	-0.553954	5.61481	22.1389	0.000118196	0.0066194	2.17918
WBGene00000196	aars-1	-0.451288	5.4312	21.9824	0.000119329	0.00667276	2.17569
WBGene00017851	F27C1.1	2.31333	-1.5235	21.979	0.000119434	0.00667276	2.17569
WBGene00020561	T19C3.3	-0.729961	6.76332	27.4322	0.000121213	0.00676414	2.16979
WBGene00000765	coq-5	-0.462848	5.56239	21.887	0.000122291	0.00679999	2.16749
WBGene00010188	F57B1.5	0.738446	2.16769	21.8915	0.000122147	0.00679999	2.16749
WBGene00016714	C46F2.1	-0.745345	3.62197	22.6657	0.000122041	0.00679999	2.16749
WBGene00000541	cln-3.3	-0.633215	3.41703	21.8164	0.000124533	0.00691351	2.1603
WBGene00006382	taf-1	-0.434906	5.93434	21.8134	0.000124627	0.00691351	2.1603
WBGene00001577	gem-4	0.805179	1.98179	21.7542	0.000126544	0.00701154	2.15419
WBGene00018114	srt-41	4.60143	-2.81826	21.7494	0.000126701	0.00701195	2.15416
WBGene00017283	F09E5.3	-0.418954	7.20636	21.7409	0.000126979	0.00701904	2.15372
WBGene00001814	haf-4	-0.461461	8.09542	21.7169	0.000127768	0.00705431	2.15155
WBGene00010230	rpac-19	-0.495297	5.24639	21.7078	0.000128069	0.00706264	2.15103
WBGene00004236	ptr-22	-1.28172	2.07521	26.2623	0.000129631	0.00714039	2.14628
WBGene00002957	let-858	-0.419148	6.5748	21.6353	0.000130493	0.00716262	2.14493
WBGene00016440	gipc-1	1.89732	-0.557378	21.6378	0.000130406	0.00716262	2.14493
WBGene00021127	W10C8.4	0.912674	2.38611	21.6404	0.000130321	0.00716262	2.14493
WBGene00000979	dhs-16	-0.712782	3.51663	21.6252	0.000130833	0.00717285	2.14431
WBGene00001048	dnj-30	-0.477029	4.9055	21.6081	0.000131413	0.00719622	2.1429
WBGene00001974	hmg-4	-0.427682	6.70928	21.5851	0.0001322	0.00723087	2.14081
WBGene00007617	rrbs-1	-0.459899	7.34945	21.5593	0.000133087	0.00727094	2.13841
WBGene00021818	Y53G8B.2	0.673491	2.9527	21.5375	0.000133839	0.0073035	2.13647
WBGene00185001	F56A8.9	0.657653	3.60552	21.5259	0.000134243	0.00731704	2.13566
WBGene00013394	ule-5	4.51412	-2.2836	22.5485	0.000134487	0.00732181	2.13538
WBGene00003463	msp-76	3.2497	-2.13342	21.4519	0.00013685	0.00743921	2.12847
WBGene00003647	nhr-57	-0.846704	2.43988	21.4487	0.000136961	0.00743921	2.12847
WBGene00016073	C24H12.4	-0.417309	6.94873	21.4314	0.00013758	0.00746419	2.12702
WBGene00017159	F01F1.2	-0.467746	5.2037	21.4065	0.000138475	0.00750406	2.1247
WBGene00003467	msp-81	4.30052	-1.94888	24.1792	0.000139069	0.00752756	2.12335
WBGene00008357	nspc-16	-0.822386	3.16362	22.1443	0.0001419	0.0076631	2.1156
WBGene00220140	Y34F4.7	2.59959	-1.86175	21.3142	0.000141843	0.0076631	2.1156
WBGene00006571	tim-1	-0.496775	5.63831	21.2944	0.00014258	0.00766824	2.1153
WBGene00009433	F35E12.9	1.17455	4.86552	37.1609	0.000142597	0.00766824	2.1153
WBGene00010740	K10D3.6	1.05741	1.62138	21.2925	0.00014265	0.00766824	2.1153
WBGene00016912	clec-86	-0.875624	2.29495	21.2951	0.000142554	0.00766824	2.1153
WBGene00020105	R148.7	-0.752255	3.2126	21.2852	0.000142923	0.00767412	2.11497
WBGene00011291	R102.4	-0.448007	5.68084	21.275	0.000143302	0.00767688	2.11482
WBGene00020321	T07F12.1	0.578292	3.78499	21.2758	0.000143273	0.00767688	2.11482
WBGene00021316	Y32H12A.8	-0.429561	6.28765	21.2424	0.000144527	0.00773369	2.11161
WBGene00011100	nhr-209	0.764376	2.66799	21.2359	0.000144773	0.00773801	2.11137
WBGene00011768	oac-46	-0.558557	6.96115	21.9592	0.000145829	0.00778557	2.10871
WBGene00009048	cth-1	-0.652376	4.59741	22.7136	0.000146242	0.00779876	2.10797
WBGene00004093	ppw-1	0.465451	5.30599	21.1802	0.000146899	0.00782489	2.10652
WBGene00018866	nath-10	-0.410263	7.16395	21.1664	0.000147429	0.00784419	2.10545
WBGene00008378	ule-3	2.48194	-1.67315	21.1161	0.000149384	0.00790026	2.10236
WBGene00010724	K09E9.1	-0.519859	4.10327	21.1311	0.000148799	0.00790026	2.10236
WBGene00012984	Y48B6A.13	-0.464834	4.85846	21.1258	0.000149006	0.00790026	2.10236
WBGene00017490	pud-2.1	2.15055	1.03747	31.7464	0.000149317	0.00790026	2.10236
WBGene00019678	K12H4.3	-0.456637	6.66064	21.1133	0.000149494	0.00790026	2.10236
WBGene00044284	spp-21	4.26483	-2.45399	21.1197	0.000149244	0.00790026	2.10236
WBGene00023500	C11H1.9	-0.453446	6.96363	21.0626	0.000151497	0.00799709	2.09707
WBGene00009639	nspc-15	-0.940331	2.03387	21.0493	0.000152027	0.0080071	2.09652
WBGene00015297	sco-1	-0.410397	5.66686	21.0492	0.000152028	0.0080071	2.09652
WBGene00011227	nlp-67	1.14316	3.69665	30.7655	0.00015294	0.00804611	2.09441
WBGene00001431	fkb-6	-0.500266	7.67486	20.9847	0.000154627	0.00812572	2.09014
WBGene00017587	F19B10.5	2.98998	-2.29107	20.9532	0.000155917	0.00817517	2.0875
WBGene00023422	mrpl-21	-0.467796	4.97643	20.9545	0.00015586	0.00817517	2.0875
WBGene00017989	nol-10	-0.414273	6.32474	20.9173	0.000157396	0.00824352	2.08389
WBGene00008043	C40H1.8	-1.03796	4.4214	31.3757	0.000158126	0.00827247	2.08236
WBGene00021808	Y53G8AM.8	0.451716	4.58371	20.8761	0.000159114	0.0083079	2.08051
WBGene00045293	fbxa-175	1.15722	0.543118	20.8751	0.000159157	0.0083079	2.08051
WBGene00007303	rnh-1.3	2.04848	0.773071	28.293	0.000159351	0.00830875	2.08046
WBGene00006539	tbb-6	-0.931397	2.14934	20.8593	0.00015982	0.00832396	2.07967
WBGene00020705	T22H9.1	-0.46447	5.76613	20.8431	0.000160506	0.00835042	2.07829
WBGene00014053	ZK669.3	1.34157	-0.0695436	20.8286	0.000161119	0.00837303	2.07712
WBGene00044617	bus-1	-1.29757	2.73458	28.4946	0.000162146	0.00841702	2.07484
WBGene00010007	F53H4.2	4.15316	-2.65936	20.7523	0.000164404	0.00852484	2.06931
WBGene00018997	F57B9.3	-0.709346	2.61662	20.7329	0.000165249	0.00855919	2.06757
WBGene00015483	C05D11.5	0.620681	3.30209	20.7177	0.000165918	0.00858431	2.06629
WBGene00021779	Y51H7C.1	2.37362	-0.837525	22.5775	0.000166955	0.00862846	2.06407
WBGene00000713	col-140	2.79037	1.0263	37.2517	0.000168492	0.00869832	2.06056
WBGene00003367	mix-1	-0.430487	6.4986	20.6502	0.000168912	0.00871039	2.05996
WBGene00020166	T02G5.7	-0.458925	7.51789	20.64	0.000169368	0.00872434	2.05927
WBGene00010643	K07G5.4	0.978366	1.42177	20.6022	0.000171078	0.00879309	2.05586
WBGene00019245	sacy-1	-0.412901	5.53723	20.6061	0.000170901	0.00879309	2.05586
WBGene00019554	K09C4.10	-0.470448	4.74982	20.5949	0.000171409	0.00880044	2.0555
WBGene00008521	F02D8.4	1.3046	5.59957	40.8732	0.000172042	0.00882325	2.05437
WBGene00004008	pgp-14	0.891368	6.57736	30.6844	0.000172838	0.00885443	2.05284
WBGene00022608	madf-9	0.470012	5.43086	20.5448	0.000173705	0.00888913	2.05114
WBGene00017025	D1037.1	-0.450409	5.06637	20.5262	0.000174567	0.00892346	2.04947
WBGene00003452	msp-59	3.18418	-1.85077	20.9861	0.000175374	0.00895427	2.04797
WBGene00021644	Y47G6A.18	-0.447264	6.37587	20.5051	0.000175551	0.00895427	2.04797
WBGene00003073	lars-1	-0.446751	8.58041	20.4921	0.000176161	0.00897561	2.04694
WBGene00006956	wrt-10	-1.10854	8.22643	35.2523	0.000176778	0.00898532	2.04647
WBGene00009211	wdr-46	-0.404739	6.61091	20.4717	0.000177119	0.00898532	2.04647
WBGene00021599	srt-42	1.33563	0.030225	20.4734	0.00017704	0.00898532	2.04647
WBGene00022612	ZC449.2	-1.00427	3.83169	27.6574	0.000176578	0.00898532	2.04647
WBGene00000698	col-124	2.14368	1.72461	34.8297	0.000178092	0.00902491	2.04456
WBGene00018532	F47B7.1	0.520737	6.54448	20.515	0.000178467	0.00903418	2.04411
WBGene00011188	R10D12.7	1.48541	-0.221265	20.4115	0.000179987	0.0090938	2.04125
WBGene00194703	F26B1.8	4.37689	-2.63356	20.4105	0.000180033	0.0090938	2.04125
WBGene00013742	sas-1	-0.809722	2.96606	20.7903	0.000180414	0.00910321	2.04081
WBGene00013477	Y69E1A.5	0.821137	5.2771	27.5834	0.000181957	0.0091712	2.03757
WBGene00006562	tdc-1	-0.90218	4.91213	29.0696	0.000182944	0.00921109	2.03569
WBGene00019765	M03F8.6	0.745389	2.54158	20.3458	0.000183171	0.00921257	2.03562
WBGene00018249	F40H3.1	0.439057	4.90337	20.3407	0.00018342	0.00921522	2.03549
WBGene00021277	Y23H5B.6	-0.421765	6.55897	20.3364	0.000183634	0.00921611	2.03545
WBGene00002295	let-19	-0.416078	6.74328	20.3242	0.000184231	0.00922631	2.03497
WBGene00018609	F48E8.2	-0.453604	5.03934	20.3271	0.000184089	0.00922631	2.03497
WBGene00008151	rrp-1	-0.416867	6.3456	20.3152	0.000184678	0.00923883	2.03438
WBGene00020774	T24E12.5	-6.37559	2.013	58.6259	0.00018729	0.00935951	2.02875
WBGene00010442	bus-12	-0.549419	4.22205	20.2288	0.000189001	0.00943497	2.02526
WBGene00018223	bath-13	1.39014	0.040378	20.2053	0.000190195	0.00948445	2.02299
WBGene00010336	acox-1.6	0.459007	5.99715	20.193	0.000190826	0.00950583	2.02201
WBGene00020601	T20B12.3	-0.399193	5.937	20.1676	0.000192129	0.00956057	2.01952
WBGene00015597	fbxa-162	1.98147	-1.01557	20.1629	0.000192374	0.00956262	2.01942
WBGene00017769	hmgs-1	-0.471184	5.58688	20.1385	0.000193637	0.00961518	2.01704
WBGene00011944	T23D8.3	-0.44256	7.2037	20.1236	0.000194417	0.00964371	2.01576
WBGene00001666	gpa-4	0.82929	1.90188	20.1015	0.000195573	0.00967941	2.01415
WBGene00012184	mnr-1	0.551758	5.43848	20.6226	0.000195705	0.00967941	2.01415
WBGene00015449	ugt-63	-2.52309	4.20353	54.4144	0.000195756	0.00967941	2.01415
WBGene00000266	bre-1	-0.463967	6.77269	20.0673	0.000197381	0.00974947	2.01102
WBGene00009686	ent-7	-0.584706	4.27002	20.0478	0.000198423	0.00979059	2.00919
WBGene00045131	T04A11.14	-1.48894	-0.464241	19.9876	0.000201666	0.00994015	2.00261
WBGene00006566	tgt-1	-0.456888	4.6085	19.9237	0.000205181	0.0101028	1.99556
WBGene00008410	D2023.6	-0.42204	5.19691	19.9116	0.00020585	0.0101046	1.99548
WBGene00013393	Y62H9A.5	4.90004	-2.79998	19.9175	0.000205522	0.0101046	1.99548
WBGene00021008	W03F11.5	-0.851271	2.28413	19.9114	0.000205864	0.0101046	1.99548
WBGene00000934	dat-1	0.569128	3.25791	19.8884	0.000207145	0.0101514	1.99347
WBGene00001980	hmr-1	-0.456441	7.45575	19.8865	0.000207252	0.0101514	1.99347
WBGene00022121	cogc-3	-0.415379	5.55915	19.8765	0.000207812	0.0101682	1.99275
WBGene00010540	K03H1.5	-0.430297	6.24515	19.866	0.000208406	0.0101867	1.99197
WBGene00003821	nst-1	-0.41653	7.97133	19.8579	0.000208863	0.0101984	1.99147
WBGene00004322	rcq-5	-0.421199	5.09585	19.8269	0.000210624	0.0102429	1.98958
WBGene00011450	ttr-22	1.67236	0.528164	22.8961	0.000210512	0.0102429	1.98958
WBGene00013550	Y75B8A.14	-0.440747	5.20873	19.8265	0.000210648	0.0102429	1.98958
WBGene00015551	adah-1	-0.467829	6.72284	19.8353	0.000210147	0.0102429	1.98958
WBGene00022363	Y92H12BL.1	-0.480512	5.24153	19.8212	0.000210952	0.010247	1.9894
WBGene00020517	hpo-8	-0.41608	7.27452	19.7981	0.000212275	0.0103006	1.98714
WBGene00013399	Y62H9A.11	2.58174	-2.16828	19.7816	0.000213229	0.0103255	1.98609
WBGene00015002	B0034.1	1.52506	3.39224	34.9184	0.000213062	0.0103255	1.98609
WBGene00006804	unc-71	-0.457891	4.73607	19.7718	0.000213795	0.0103423	1.98538
WBGene00020110	hsp-75	-0.396182	7.4185	19.7626	0.000214327	0.0103573	1.98475
WBGene00045474	C49G9.2	-0.942103	1.4172	19.752	0.000214944	0.0103764	1.98395
WBGene00014243	dcaf-1	-0.393874	6.21227	19.7426	0.000215495	0.0103923	1.98329
WBGene00017831	F26F4.12	-0.49001	4.26844	19.6822	0.000219063	0.0105535	1.9766
WBGene00011698	cyp-34A1	1.17487	0.75131	19.6748	0.000219506	0.010564	1.97617
WBGene00013580	Y79H2A.3	-0.409751	6.22226	19.649	0.000221053	0.0106275	1.97357
WBGene00020234	T05A12.3	-0.396748	6.00282	19.6253	0.000222484	0.0106854	1.97121
WBGene00011081	R07B1.9	1.67488	4.6251	43.9984	0.000223438	0.0107092	1.97024
WBGene00012121	T28C6.7	-0.398278	7.54373	19.6096	0.000223434	0.0107092	1.97024
WBGene00013902	ZC455.1	0.615534	4.40466	20.3152	0.00022402	0.0107229	1.96969
WBGene00017777	F25B5.6	-0.51082	7.32569	19.5974	0.000224181	0.0107229	1.96969
WBGene00016250	hsp-110	-0.7976	8.75687	26.0113	0.00022506	0.010754	1.96843
WBGene00007401	C07A9.5	-3.29573	-2.31429	19.5726	0.000225698	0.0107735	1.96764
WBGene00003648	nhr-58	0.610118	3.38075	19.5552	0.000226774	0.0108139	1.96602
WBGene00010524	K03B8.6	-0.452526	5.47833	19.5473	0.000227264	0.010818	1.96585
WBGene00018470	F45E4.5	1.09715	2.43146	23.0172	0.000227322	0.010818	1.96585
WBGene00012324	rhy-1	-0.644407	3.74214	19.5401	0.000227712	0.0108256	1.96555
WBGene00009241	F28H7.8	1.38806	4.30312	36.6925	0.00022858	0.0108448	1.96478
WBGene00021288	clec-123	3.25866	-2.37236	19.5264	0.000228565	0.0108448	1.96478
WBGene00007932	zip-5	0.704133	3.12308	19.5127	0.000229423	0.0108738	1.96362
WBGene00010437	cox-11	-0.424143	4.80952	19.487	0.000231037	0.0109392	1.96101
WBGene00007946	ugt-33	0.660779	2.81528	19.4655	0.000232403	0.0109892	1.95904
WBGene00021407	Y38C1AB.5	-1.24317	0.134767	19.463	0.00023256	0.0109892	1.95904
WBGene00010274	F58G6.3	-0.647303	4.13779	20.2615	0.000233069	0.0109918	1.95893
WBGene00014244	ZK1307.1	-0.723562	7.44563	24.7158	0.000233084	0.0109918	1.95893
WBGene00020688	cest-6	-0.678648	2.53664	19.4468	0.000233594	0.0110047	1.95842
WBGene00016939	C55B6.1	-0.664032	3.29977	19.4385	0.000234126	0.0110187	1.95787
WBGene00018040	F35D2.2	-0.694436	2.99131	19.4328	0.000234492	0.0110249	1.95763
WBGene00017018	D1014.5	-0.798858	6.74591	26.8688	0.000235018	0.0110385	1.95709
WBGene00004395	rol-3	-0.577504	5.01181	20.349	0.000236272	0.0110832	1.95533
WBGene00022582	ZC262.5	-0.831642	2.54581	19.4025	0.000236442	0.0110832	1.95533
WBGene00014184	ZK1025.4	-0.626227	3.695	19.3831	0.000237705	0.0111313	1.95345
WBGene00006051	ssq-2	2.36405	-1.13948	20.024	0.000238787	0.0111708	1.95192
WBGene00007623	C16C10.2	-0.44781	5.42908	19.3385	0.000240632	0.0112459	1.94901
WBGene00007754	C27A7.2	-0.760129	2.90414	19.2998	0.000243198	0.0113545	1.94483
WBGene00020080	math-37	1.17059	0.486884	19.2948	0.000243532	0.0113588	1.94467
WBGene00001029	dnj-11	-0.396355	7.63914	19.2909	0.000243794	0.0113597	1.94463
WBGene00006945	wars-1	-0.469003	6.80059	19.2503	0.000246535	0.0114533	1.94107
WBGene00012176	W01C9.2	-2.2153	2.38887	37.686	0.000246482	0.0114533	1.94107
WBGene00018675	F52C9.5	-0.727169	2.20303	19.2516	0.000246446	0.0114533	1.94107
WBGene00008743	F13D12.9	-0.917724	5.49024	29.1085	0.000246833	0.0114557	1.94098
WBGene00012999	rpoa-1	-0.413057	7.07572	19.2336	0.000247667	0.0114831	1.93994
WBGene00011107	R07E3.6	-1.0662	7.63902	32.8414	0.000249503	0.0115274	1.93827
WBGene00011238	ugt-59	-0.961022	2.10412	19.7316	0.000249392	0.0115274	1.93827
WBGene00016797	C50A2.3	-0.668207	2.82396	19.2053	0.000249608	0.0115274	1.93827
WBGene00016860	cyp-33C9	-0.491445	3.97964	19.2067	0.000249508	0.0115274	1.93827
WBGene00000236	bag-1	-0.521647	4.71336	19.1842	0.000251062	0.0115718	1.9366
WBGene00001781	gst-33	1.16864	1.829	21.6796	0.000250882	0.0115718	1.9366
WBGene00007480	glna-1	0.740634	3.04502	19.1715	0.000251944	0.0116011	1.9355
WBGene00021408	trpl-4	2.88533	-0.93699	19.1647	0.000252414	0.0116113	1.93512
WBGene00018206	ugt-61	-0.560098	3.98015	19.1508	0.000253383	0.0116444	1.93388
WBGene00006617	tars-1	-0.403636	8.55701	19.1015	0.000256855	0.0117809	1.92882
WBGene00007599	C15A11.7	1.03912	3.64247	26.25	0.00025683	0.0117809	1.92882
WBGene00014112	ZK856.11	-0.553357	4.60362	19.0846	0.000258054	0.0118243	1.92722
WBGene00019430	K06A5.2	2.83382	-1.93854	19.0787	0.000258481	0.0118323	1.92693
WBGene00019959	R08E3.3	-0.439767	5.07823	19.0603	0.000259794	0.0118808	1.92515
WBGene00007113	B0035.15	-0.455205	5.26703	19.0122	0.000263277	0.0120173	1.92019
WBGene00008255	C51E3.10	0.889336	1.43772	19.005	0.000263804	0.0120173	1.92019
WBGene00022025	cus-2	-0.429077	5.43818	19.0078	0.000263599	0.0120173	1.92019
WBGene00045132	ZK643.9	-1.50175	-0.481897	19.008	0.000263583	0.0120173	1.92019
WBGene00009830	cutl-18	-0.774009	2.26365	18.9897	0.00026492	0.0120564	1.91878
WBGene00016944	uri-1	-0.476995	4.38075	18.983	0.000265413	0.0120672	1.9184
WBGene00009908	F49H6.5	2.0772	-0.710672	18.9688	0.000266463	0.0120938	1.91744
WBGene00018144	F37C4.4	-0.469068	4.84192	18.9681	0.000266515	0.0120938	1.91744
WBGene00017360	F10E9.11	-0.56764	3.44859	18.9446	0.000268253	0.0121609	1.91504
WBGene00013688	riok-2	-0.401871	6.57625	18.9308	0.000269281	0.012193	1.91389
WBGene00016884	C52E2.5	0.825688	1.63029	18.9263	0.00026962	0.012193	1.91389
WBGene00017210	F07E5.5	-0.404494	6.50712	18.9247	0.000269742	0.012193	1.91389
WBGene00002163	ist-1	-0.503652	4.98676	18.9206	0.000270044	0.0121936	1.91387
WBGene00012759	sup-1	0.397177	6.22575	18.9176	0.000270275	0.0121936	1.91387
WBGene00009192	asah-2	0.510584	4.94605	18.9057	0.000271166	0.012222	1.91286
WBGene00000933	dap-3	-0.383371	6.7865	18.8838	0.000272825	0.012285	1.91063
WBGene00015702	C11D2.4	-0.419327	5.51808	18.8772	0.000273325	0.0122957	1.91025
WBGene00020651	T21D12.12	1.39674	4.34025	35.8556	0.000274136	0.0123204	1.90938
WBGene00018090	F36D4.5	0.410288	5.7497	18.8257	0.000277268	0.0124492	1.90486
WBGene00014165	puf-12	-0.415403	8.46285	18.7899	0.000280044	0.0125618	1.90095
WBGene00001817	haf-7	0.806009	5.24583	25.5375	0.000280504	0.0125704	1.90065
WBGene00017712	F22E5.17	-3.80437	-2.41536	18.7716	0.000281476	0.0125949	1.89981
WBGene00021956	Y57E12AL.1	0.402787	6.49557	18.7701	0.000281588	0.0125949	1.89981
WBGene00010844	prp-3	-0.424691	6.0806	18.7625	0.000282184	0.0126095	1.8993
WBGene00008340	C55A6.11	1.92836	-1.09219	18.7538	0.000282877	0.0126284	1.89865
WBGene00021133	tomm-22	0.417679	5.78398	18.731	0.000284674	0.0126966	1.89631
WBGene00003391	mog-3	-0.456842	5.89703	18.7225	0.000285353	0.0127147	1.89569
WBGene00006844	unc-120	0.486488	5.40688	18.7179	0.000285718	0.0127189	1.89555
WBGene00003545	nas-27	2.41566	3.9207	47.1843	0.00029178	0.0129764	1.88684
WBGene00007584	C14C10.1	3.76499	-2.51431	18.6074	0.00029468	0.013093	1.88296
WBGene00002039	hum-6	-0.587863	7.10064	20.7487	0.00029593	0.0131361	1.88153
WBGene00022815	asic-1	0.666014	2.71632	18.5738	0.000297468	0.0131919	1.87969
WBGene00045252	Y62H9A.15	0.739111	1.79147	18.5592	0.000298687	0.0132334	1.87833
WBGene00019215	H20E11.3	0.840342	2.5632	18.8812	0.000299294	0.0132478	1.87786
WBGene00009640	nspc-10	-0.748974	4.15945	21.6978	0.000299882	0.0132613	1.87741
WBGene00023416	spi-1	-0.72331	2.90817	18.5274	0.000301364	0.0133143	1.87568
WBGene00010042	bcs-1	-0.41311	5.34366	18.5086	0.000302953	0.0133593	1.87422
WBGene00015887	C17C3.1	-0.547318	5.8994	19.7379	0.000302742	0.0133593	1.87422
WBGene00017443	F13H8.11	-0.740667	3.08185	18.6791	0.000303578	0.0133743	1.87373
WBGene00007458	ule-4	2.87148	-1.44948	20.3051	0.000305019	0.0134251	1.87208
WBGene00000614	col-37	-1.48787	-0.753877	18.4712	0.000306152	0.0134498	1.87129
WBGene00007951	dmsr-8	0.604329	3.44139	18.4712	0.000306153	0.0134498	1.87129
WBGene00003392	mog-4	-0.395505	6.02459	18.4648	0.000306705	0.0134614	1.87091
WBGene00003468	msp-113	4.9518	-2.48272	19.4624	0.000307739	0.0134942	1.86985
WBGene00007339	C05D12.1	-0.538386	4.86545	18.6406	0.000308944	0.0135343	1.86856
WBGene00001906	his-32	-0.691649	3.05185	18.434	0.000309375	0.0135349	1.86855
WBGene00010881	M05D6.9	-0.556383	3.40784	18.4322	0.000309533	0.0135349	1.86855
WBGene00013578	scav-2	0.407456	4.89936	18.4237	0.000310268	0.0135543	1.86792
WBGene00008167	acox-1.5	0.713375	7.08587	23.6475	0.000311047	0.0135757	1.86724
WBGene00017075	nap-1	-0.419823	9.58707	18.4098	0.000311488	0.0135823	1.86703
WBGene00011167	chil-23	1.38451	0.000371982	18.4063	0.00031179	0.0135829	1.86701
WBGene00001077	dpy-18	-0.463083	7.93077	18.3844	0.000313723	0.0135926	1.8667
WBGene00001790	gst-42	-0.402191	5.55697	18.3873	0.000313469	0.0135926	1.8667
WBGene00009547	F38H4.3	0.66619	3.45477	18.3807	0.000314044	0.0135926	1.8667
WBGene00012582	clec-8	0.754089	2.71153	18.3854	0.000313629	0.0135926	1.8667
WBGene00017744	fbxc-54	0.654083	2.38463	18.3884	0.000313366	0.0135926	1.8667
WBGene00018384	F43C11.7	1.20998	1.74032	20.785	0.000313952	0.0135926	1.8667
WBGene00023271	F19G12.t1	-3.14544	-2.05647	18.3882	0.000313389	0.0135926	1.8667
WBGene00015398	tag-293	-1.44762	-0.388225	18.3678	0.000315195	0.0136299	1.86551
WBGene00019880	R05D3.6	-0.821686	2.55804	18.4344	0.000316318	0.0136658	1.86437
WBGene00003091	lys-2	0.609329	6.34053	21.1904	0.000317563	0.0136818	1.86386
WBGene00012291	W06A7.2	0.46913	4.92062	18.3444	0.000317275	0.0136818	1.86386
WBGene00015622	C09B8.3	-0.704109	2.91521	18.3427	0.000317427	0.0136818	1.86386
WBGene00012609	Y38F1A.7	6.62806	-3.45043	19.0417	0.000318613	0.0137144	1.86282
WBGene00019486	K07D4.6	-0.777335	2.29853	18.3259	0.000318937	0.0137157	1.86278
WBGene00011064	adsl-1	-0.426098	6.73866	18.286	0.000322548	0.0138583	1.85829
WBGene00009818	acbp-3	-0.396049	6.41057	18.2735	0.000323684	0.0138817	1.85756
WBGene00017826	tag-340	-0.443092	5.61708	18.2764	0.000323422	0.0138817	1.85756
WBGene00020616	T20D4.10	0.66781	4.50902	20.6373	0.000324705	0.0139127	1.85659
WBGene00002001	hars-1	-0.391903	7.14403	18.2541	0.000325464	0.0139325	1.85597
WBGene00011247	mrpl-49	-0.421223	5.39601	18.2436	0.000326431	0.0139462	1.85554
WBGene00018674	F52C9.3	-0.407753	5.96555	18.241	0.000326677	0.0139462	1.85554
WBGene00018892	cir-1	-0.460988	5.8912	18.2449	0.000326314	0.0139462	1.85554
WBGene00017369	F10G7.5	-0.38569	5.82255	18.2299	0.000327698	0.0139663	1.85492
WBGene00020215	T04G9.4	-0.434086	5.66654	18.2295	0.000327743	0.0139663	1.85492
WBGene00007454	C08F11.7	1.78962	-0.738939	18.1984	0.000330635	0.0140768	1.8515
WBGene00007395	dcar-1	0.400422	6.04244	18.1656	0.000333719	0.0141952	1.84786
WBGene00022161	Y71G12B.26	1.00779	2.86216	22.0098	0.000334675	0.0142229	1.84701
WBGene00022491	Y119D3B.14	-0.397494	4.96003	18.1489	0.000335303	0.0142367	1.84659
WBGene00016638	perm-4	2.56721	-0.716314	22.2758	0.000336186	0.0142484	1.84623
WBGene00023493	nspc-12	-0.936488	1.85004	18.1417	0.000335986	0.0142484	1.84623
WBGene00021747	Y50D4C.2	-0.74467	2.16719	18.1291	0.000337192	0.0142781	1.84533
WBGene00017398	slc-17.6	0.542723	4.22162	18.1157	0.000338471	0.0143194	1.84408
WBGene00020557	T19B4.3	-0.429176	6.53578	18.0787	0.00034205	0.0144447	1.84029
WBGene00044318	tag-267	-0.405379	5.43214	18.08	0.00034192	0.0144447	1.84029
WBGene00009094	F23H12.5	-0.850206	7.09023	26.5464	0.000342405	0.0144467	1.84023
WBGene00194667	Y105C5A.1271	-1.65778	-0.469282	18.0696	0.000342929	0.0144558	1.83996
WBGene00010972	R01H10.4	-0.598764	3.52191	18.0551	0.000344347	0.0145025	1.83856
WBGene00044796	W03D8.11	-0.799951	2.93701	18.8997	0.000344657	0.0145025	1.83856
WBGene00009966	isy-1	-0.447653	5.1733	18.0365	0.000346171	0.0145401	1.83743
WBGene00195168	T13C5.9	-0.987822	1.03307	18.0379	0.000346036	0.0145401	1.83743
WBGene00001722	grl-13	1.65208	-0.992904	18.023	0.000347507	0.0145832	1.83615
WBGene00010868	somi-1	0.482616	6.76558	18.0068	0.000349108	0.0146373	1.83454
WBGene00003150	mbk-2	0.421147	7.47294	18.0007	0.00034972	0.0146467	1.83426
WBGene00009681	gipc-2	1.60039	-0.624597	17.9983	0.000349959	0.0146467	1.83426
WBGene00006053	ssq-4	1.83027	-1.27565	17.9859	0.000351193	0.0146842	1.83315
WBGene00006824	unc-95	0.442747	6.14229	17.983	0.00035148	0.0146842	1.83315
WBGene00000169	aqp-1	0.476168	5.68505	17.9645	0.000353343	0.0147489	1.83124
WBGene00012585	lips-15	1.6695	5.78745	42.2886	0.000353828	0.0147559	1.83103
WBGene00011006	ugt-47	0.528625	5.12638	18.3143	0.000354863	0.0147728	1.83054
WBGene00020742	T23H2.3	-0.426313	5.9771	17.9507	0.000354737	0.0147728	1.83054
WBGene00000039	acn-1	-0.667072	8.56044	21.4603	0.000355927	0.014804	1.82962
WBGene00004191	prx-1	-0.468142	4.6681	17.911	0.000358768	0.0149089	1.82655
WBGene00017681	slc-17.5	-0.558392	4.16706	17.907	0.000359186	0.014913	1.82643
WBGene00004296	rad-50	-0.420834	5.51512	17.9015	0.000359746	0.0149231	1.82614
WBGene00018393	msra-1	-0.676879	8.0764	21.8352	0.000360975	0.0149609	1.82504
WBGene00000858	cwn-2	-0.460796	4.22872	17.876	0.000362376	0.0150056	1.82375
WBGene00044321	mrps-30	-0.372691	6.95592	17.8597	0.00036407	0.0150625	1.8221
WBGene00003620	nhr-21	0.506237	4.08206	17.8544	0.000364613	0.0150716	1.82184
WBGene00007516	gpx-5	1.40013	5.34117	36.9961	0.000365261	0.0150851	1.82145
WBGene00077761	zip-9	-0.421874	6.63705	17.8407	0.000366051	0.0151044	1.8209
WBGene00219686	linc-125	2.4141	-0.831392	20.3668	0.000367581	0.0151542	1.81947
WBGene00003876	pept-2	0.467671	4.68014	17.817	0.000368538	0.0151803	1.81872
WBGene00011262	pho-8	2.57987	4.60983	46.9912	0.000370603	0.015252	1.81667
WBGene00015197	B0454.6	0.596806	3.79669	17.7908	0.000371311	0.0152677	1.81623
WBGene00015050	clec-51	0.53349	5.05299	18.259	0.000371784	0.0152738	1.81605
WBGene00020171	T02H6.1	-0.381359	6.26303	17.7684	0.000373702	0.0153391	1.8142
WBGene00014233	ZK1128.7	0.471966	3.84318	17.7399	0.000376761	0.0154511	1.81104
WBGene00003862	old-1	0.942166	2.27605	18.9063	0.00037784	0.0154734	1.81042
WBGene00008490	F01D4.8	0.835501	2.41626	17.9761	0.000378293	0.0154734	1.81042
WBGene00019473	cyp-35A5	-0.671053	3.45813	17.921	0.000378136	0.0154734	1.81042
WBGene00004337	rfc-1	-0.399159	5.83555	17.7202	0.000378898	0.0154846	1.8101
WBGene00022722	tomm-70	-0.372173	7.07973	17.7114	0.000379852	0.0155101	1.80939
WBGene00006497	tag-151	-0.395943	7.71654	17.6967	0.000381464	0.0155623	1.80792
WBGene00006724	ubh-4	-0.410566	6.72851	17.688	0.000382421	0.015565	1.80785
WBGene00014834	T08G5.4	-2.12709	-1.56338	17.687	0.000382526	0.015565	1.80785
WBGene00021028	W04C9.6	1.32458	0.27309	17.6921	0.000381964	0.015565	1.80785
WBGene00010397	suox-1	-0.41558	6.09818	17.6817	0.000383107	0.0155752	1.80757
WBGene00012222	W03C9.6	-0.562622	4.37489	17.7679	0.00038647	0.0156982	1.80415
WBGene00003435	msp-40	2.99081	-1.72342	18.7742	0.000387518	0.0157136	1.80372
WBGene00003604	nhr-5	0.566706	3.47417	17.6429	0.000387407	0.0157136	1.80372
WBGene00012738	eif-3.J	-0.468345	6.74542	17.6176	0.000390232	0.01581	1.80107
WBGene00000986	dhs-23	-1.66239	3.45611	33.5314	0.00039111	0.0158319	1.80047
WBGene00007214	C01A2.2	-0.447268	4.4361	17.5996	0.000392257	0.0158407	1.80023
WBGene00016067	C24H10.1	0.558865	3.41974	17.6029	0.000391885	0.0158407	1.80023
WBGene00017501	pud-3	3.94265	2.21483	44.7763	0.000392342	0.0158407	1.80023
WBGene00013002	Y48E1B.3	-0.387143	5.56959	17.5665	0.000396008	0.0159612	1.79693
WBGene00018877	aman-1	-0.712533	4.85168	21.7463	0.000395938	0.0159612	1.79693
WBGene00000800	cars-1	-0.427648	7.67971	17.5478	0.000398154	0.0160339	1.79496
WBGene00017892	F28B4.3	-0.427452	8.87232	17.5345	0.000399686	0.0160818	1.79367
WBGene00008010	C38D9.2	0.967058	1.1077	17.5224	0.000401085	0.0161242	1.79252
WBGene00000668	col-93	3.43525	-2.61781	17.5072	0.000402844	0.0161811	1.79099
WBGene00011718	T11G6.3	0.490911	3.95776	17.4788	0.00040616	0.0163003	1.7878
WBGene00019890	R05F9.6	-0.425141	7.8342	17.4637	0.000407937	0.0163576	1.78628
WBGene00017834	F26F12.3	0.468599	6.51344	17.4606	0.000408296	0.016358	1.78627
WBGene00002044	hyl-2	-0.382328	6.41329	17.451	0.000409436	0.0163897	1.78543
WBGene00009710	F44G3.10	-1.0708	0.621035	17.4313	0.000411771	0.0164691	1.78333
WBGene00018885	drd-5	-0.463712	4.45517	17.4263	0.000412363	0.0164787	1.78308
WBGene00016235	C29H12.2	-0.421997	7.33237	17.4154	0.000413666	0.0165167	1.78208
WBGene00008876	F16A11.1	0.588984	5.72794	19.749	0.00041442	0.0165327	1.78166
WBGene00019673	K12C11.1	-0.423806	7.32032	17.4049	0.000414928	0.0165389	1.78149
WBGene00006886	vap-1	-0.437801	5.58952	17.3894	0.000416793	0.0165851	1.78028
WBGene00011452	ugt-55	0.858333	2.06486	17.3905	0.00041666	0.0165851	1.78028
WBGene00017467	F14F9.4	2.4159	4.79835	44.9338	0.00041861	0.0166424	1.77878
WBGene00017658	F21C10.9	-1.97037	6.13375	43.6403	0.000418944	0.0166424	1.77878
WBGene00001089	dre-1	-0.527201	7.81725	18.1618	0.000419941	0.0166679	1.77812
WBGene00011142	R08D7.1	-0.547313	5.00084	18.1866	0.000420456	0.0166742	1.77796
WBGene00000895	dac-1	0.554422	3.56719	17.3435	0.000422378	0.0167291	1.77653
WBGene00018365	tpst-2	1.11197	0.235969	17.342	0.000422555	0.0167291	1.77653
WBGene00019435	K06A9.1	-0.464714	5.91811	17.3015	0.000427552	0.0169126	1.77179
WBGene00020183	T03D3.5	0.606958	2.98951	17.2956	0.000428278	0.0169271	1.77142
WBGene00003596	ngp-1	-0.394006	7.85	17.2829	0.00042987	0.0169532	1.77075
WBGene00008397	D2005.1	-1.15784	0.219912	17.2816	0.000430024	0.0169532	1.77075
WBGene00020037	mrps-6	-0.41592	5.75195	17.2823	0.000429945	0.0169532	1.77075
WBGene00001150	ech-1.1	-1.06328	2.54091	20.9327	0.000435673	0.0171615	1.76544
WBGene00018932	mrpl-2	-0.39872	5.4287	17.2326	0.000436188	0.0171674	1.7653
WBGene00013287	Y57A10C.9	1.14154	0.496688	17.228	0.000436773	0.017176	1.76508
WBGene00000794	crn-1	-0.476007	5.57246	17.2035	0.000439902	0.0172845	1.76234
WBGene00018400	F43H9.4	-0.575231	3.71706	17.1952	0.000440962	0.0173116	1.76166
WBGene00001055	dpf-2	0.500566	4.95302	17.1536	0.000446347	0.0174556	1.75807
WBGene00003844	odc-1	0.89374	7.36652	26.2693	0.000446059	0.0174556	1.75807
WBGene00010791	sodh-2	2.07973	-1.46578	17.1525	0.000446491	0.0174556	1.75807
WBGene00015296	gtf-2F1	-0.396376	6.11044	17.1635	0.000445055	0.0174556	1.75807
WBGene00019744	M02H5.8	1.09166	3.44962	24.3607	0.000446028	0.0174556	1.75807
WBGene00017776	F25B5.5	-0.42493	5.5748	17.1382	0.000448355	0.0175139	1.75662
WBGene00014247	ZK1307.4	4.85314	-3.24634	17.1348	0.000448789	0.0175162	1.75656
WBGene00016911	drn-1	0.546435	3.60141	17.1171	0.00045112	0.0175925	1.75467
WBGene00011418	igdb-1	-0.841363	2.01866	17.0962	0.000453871	0.0176851	1.75239
WBGene00020728	T23E1.1	-1.21145	0.347658	17.0865	0.000455161	0.0177206	1.75152
WBGene00019296	mcu-1	0.44433	5.01331	17.0716	0.000457155	0.0177835	1.74998
WBGene00000112	alh-6	0.454662	7.31329	17.0677	0.00045767	0.0177888	1.74985
WBGene00003133	mat-2	-0.384278	5.69926	17.0534	0.000459592	0.0178004	1.74957
WBGene00007891	C33B4.2	-0.871388	3.05441	19.3865	0.000459086	0.0178004	1.74957
WBGene00009243	F29C6.1	-0.446275	4.66281	17.062	0.000458437	0.0178004	1.74957
WBGene00011511	gpcp-2	0.390192	6.86682	17.0513	0.000459867	0.0178004	1.74957
WBGene00012046	T26E4.4	-0.938922	2.27057	18.3395	0.000459588	0.0178004	1.74957
WBGene00010422	H32K16.2	1.06535	1.2732	17.0479	0.000461943	0.017866	1.74797
WBGene00009973	F53C11.3	0.414083	6.5433	17.0216	0.000463884	0.0179263	1.74651
WBGene00017108	cyp-43A1	-0.427713	4.31706	17.0143	0.000464875	0.0179498	1.74594
WBGene00021843	Y54E10BR.4	-0.374799	6.2757	17.0029	0.000466429	0.0179949	1.74485
WBGene00002077	imb-3	-0.435213	9.20841	16.9903	0.000468155	0.0180434	1.74368
WBGene00015602	fbxa-158	2.03661	-0.926979	16.9881	0.000468454	0.0180434	1.74368
WBGene00010746	K10D11.2	1.84369	-0.886566	16.9702	0.000470911	0.0181231	1.74177
WBGene00003409	mrp-3	-0.375609	5.43448	16.9284	0.000476716	0.0183165	1.73716
WBGene00022131	Y71F9B.13	0.830027	4.61508	23.0024	0.000476328	0.0183165	1.73716
WBGene00001768	gst-20	0.841574	5.46962	24.5332	0.000481911	0.0185009	1.73281
WBGene00018891	F55F8.3	-0.431715	6.81641	16.8757	0.000484159	0.0185568	1.7315
WBGene00021941	lgc-33	0.631837	2.29113	16.8773	0.000483928	0.0185568	1.7315
WBGene00004976	spe-41	1.03027	0.717476	16.8681	0.000485239	0.018583	1.73088
WBGene00000425	ced-11	0.719245	4.10303	19.5613	0.000489792	0.0187267	1.72754
WBGene00018362	ppm-1.G	-0.39757	7.47243	16.8379	0.000489565	0.0187267	1.72754
WBGene00017891	rgl-1	0.436069	6.08221	16.8269	0.000491148	0.0187633	1.72669
WBGene00022792	ZK686.2	-0.396825	6.15721	16.8206	0.000492062	0.0187829	1.72624
WBGene00007696	tram-1	-0.371762	7.92993	16.8108	0.000493486	0.0188219	1.72534
WBGene00020737	T23F2.4	1.70213	-1.03201	16.7893	0.000496609	0.0189256	1.72295
WBGene00022200	fard-1	-0.459696	6.44897	16.7512	0.000502219	0.0191239	1.71842
WBGene00008807	F14F3.4	-0.70233	3.00524	16.7095	0.000508433	0.0193448	1.71344
WBGene00009836	fbxa-185	3.1743	-1.44545	19.3795	0.00050983	0.0193822	1.7126
WBGene00012059	T26G10.1	-0.378128	6.34228	16.6931	0.000510905	0.0194073	1.71203
WBGene00050945	C45B11.7	1.38579	1.08453	19.4128	0.000513153	0.019477	1.71048
WBGene00000766	coq-6	-0.383015	5.70419	16.6617	0.00051567	0.0195567	1.70871
WBGene00007394	C06H5.6	-0.438843	5.3725	16.6565	0.000516454	0.0195706	1.7084
WBGene00012892	Y45F10D.14	-0.910537	1.56204	16.6392	0.000519105	0.0196393	1.70687
WBGene00016883	C52E2.4	0.826027	1.69834	16.6419	0.000518697	0.0196393	1.70687
WBGene00021074	W07E6.2	-0.362551	6.24218	16.6358	0.00051963	0.0196433	1.70679
WBGene00014182	ZK1025.2	-1.50412	2.26824	24.6573	0.000523405	0.01977	1.70399
WBGene00016722	C46G7.2	0.426574	7.02923	16.6073	0.000524038	0.019778	1.70382
WBGene00001453	flp-10	0.567408	3.11246	16.5923	0.00052636	0.0198337	1.7026
WBGene00021476	nsun-4	-0.435463	5.09836	16.594	0.000526104	0.0198337	1.7026
WBGene00003837	oat-1	0.637069	4.87838	19.3103	0.000527402	0.019857	1.70209
WBGene00006981	zig-4	-0.61221	3.39641	16.5442	0.00053392	0.0200736	1.69738
WBGene00011897	scpl-4	-0.372925	7.06755	16.5409	0.000534439	0.0200736	1.69738
WBGene00021757	taco-1	-0.363951	6.04335	16.5419	0.000534289	0.0200736	1.69738
WBGene00018564	F47D12.9	0.455231	5.13106	16.5085	0.0005396	0.0202512	1.69355
WBGene00014218	ZK1098.1	-0.35652	6.21234	16.4665	0.000546383	0.0204894	1.68847
WBGene00022314	Y77E11A.14	1.23221	2.39132	21.8245	0.000548964	0.0205697	1.68677
WBGene00017747	F23F1.6	0.878035	1.12005	16.4373	0.000551153	0.0206352	1.68539
WBGene00000198	art-1	-0.383831	7.93322	16.4257	0.00055305	0.0206897	1.68425
WBGene00007833	oac-6	2.17985	2.71133	33.6448	0.000555263	0.020694	1.68416
WBGene00008089	C44C10.9	0.453141	5.42193	16.4214	0.000553755	0.020694	1.68416
WBGene00012704	mlt-3	-0.458805	4.56355	16.4117	0.000555371	0.020694	1.68416
WBGene00013921	best-22	0.442645	4.54249	16.4153	0.000554762	0.020694	1.68416
WBGene00271818	K05F1.14	1.15564	0.324732	16.4161	0.000554641	0.020694	1.68416
WBGene00004145	pqn-62	0.407312	5.25214	16.3891	0.000559115	0.0208004	1.68193
WBGene00219208	B0365.9	-0.639761	5.27735	19.5667	0.0005588	0.0208004	1.68193
WBGene00007453	fbxa-98	0.984237	0.821354	16.3707	0.000562196	0.0208985	1.67989
WBGene00004112	pqn-22	0.434912	7.90271	16.3589	0.000564172	0.0209553	1.67871
WBGene00007949	C35A5.5	-0.609373	2.48943	16.3477	0.000566058	0.0209951	1.67788
WBGene00014089	ZK822.1	-1.08622	0.816598	16.3472	0.000566139	0.0209951	1.67788
WBGene00016442	C35D10.5	-0.403219	4.87355	16.3356	0.000568111	0.0210515	1.67672
WBGene00001905	his-31	-1.04178	0.910979	16.3301	0.000569046	0.0210695	1.67635
WBGene00012778	Y42A5A.3	1.55344	0.688108	19.2439	0.000570926	0.0211225	1.67526
WBGene00044686	flp-28	0.429404	4.65212	16.3158	0.00057148	0.0211263	1.67518
WBGene00008066	fbxb-65	3.04846	-2.18819	16.3085	0.000572714	0.0211552	1.67458
WBGene00021227	mct-1	-0.976099	0.646381	16.2975	0.000574605	0.0212084	1.67349
WBGene00000663	col-88	2.16185	-0.1729	20.6479	0.000575134	0.0212112	1.67344
WBGene00003465	msp-78	5.13957	-3.15145	16.2835	0.000577014	0.0212424	1.6728
WBGene00012487	Y18D10A.23	0.680774	2.46063	16.2816	0.00057734	0.0212424	1.6728
WBGene00021678	Y48G1C.5	1.97353	-1.1014	16.2864	0.000576506	0.0212424	1.6728
WBGene00044063	bpnt-1	-0.402918	6.39886	16.2727	0.000578873	0.0212821	1.67199
WBGene00010163	F56H6.2	-2.25101	-1.94223	16.2641	0.000580362	0.0213201	1.67121
WBGene00012261	lpr-3	-1.09004	9.3484	27.8575	0.000582426	0.0213792	1.67001
WBGene00020260	T05E7.4	0.740723	2.26367	16.2466	0.000583408	0.0213985	1.66962
WBGene00003692	nhr-102	0.585953	2.71047	16.2428	0.000584078	0.0214063	1.66946
WBGene00001045	dnj-27	-0.746341	6.48491	22.265	0.000585686	0.021415	1.66928
WBGene00009358	F33C8.4	0.523801	4.44564	16.238	0.000584916	0.021415	1.66928
WBGene00011428	nlp-80	0.442015	5.20172	16.2348	0.000585487	0.021415	1.66928
WBGene00004878	smf-3	0.553411	3.13367	16.2291	0.000586483	0.0214274	1.66903
WBGene00011966	T23G7.3	-0.424439	7.1336	16.2232	0.00058752	0.0214486	1.6686
WBGene00012085	T27D12.1	0.456699	6.26217	16.2166	0.000588685	0.0214744	1.66808
WBGene00008610	F09C3.2	0.439616	4.22803	16.2091	0.000589995	0.0215054	1.66745
WBGene00009389	F35B12.10	-0.441413	4.92021	16.1917	0.000593091	0.0216015	1.66552
WBGene00011572	mam-5	-0.832851	2.39022	16.6902	0.000594879	0.0216498	1.66455
WBGene00003580	ndx-3	-0.486113	4.48541	16.1767	0.00059575	0.0216647	1.66425
WBGene00017838	F26G1.2	-0.777507	2.05082	16.1487	0.000600789	0.021831	1.66093
WBGene00012123	T28D6.3	-1.42199	3.52882	27.9695	0.000603748	0.0219215	1.65913
WBGene00002071	ile-2	-0.353621	6.70724	16.1266	0.000604786	0.0219253	1.65906
WBGene00019716	M01G5.3	-0.355308	5.84611	16.1279	0.000604537	0.0219253	1.65906
WBGene00000902	daf-6	-0.631537	4.86189	18.7639	0.000606281	0.0219625	1.65832
WBGene00021977	Y58A7A.3	2.28851	4.76787	39.4326	0.00060829	0.0220182	1.65722
WBGene00018618	F48G7.7	3.89752	-2.89268	16.0991	0.000609791	0.0220555	1.65648
WBGene00006449	alg-4	2.75114	-1.62939	17.2914	0.000612678	0.0221429	1.65477
WBGene00002124	inx-2	0.832374	1.13029	16.0783	0.00061362	0.0221598	1.65443
WBGene00021491	comt-4	1.74313	-1.28455	16.0691	0.000615314	0.0222039	1.65357
WBGene00009984	F53F1.6	0.816514	2.09017	16.0489	0.000619077	0.0223064	1.65157
WBGene00017001	D1007.3	0.953428	1.11663	16.0487	0.000619108	0.0223064	1.65157
WBGene00001095	dars-2	-0.38325	4.75711	16.0394	0.000620838	0.0223344	1.65102
WBGene00044623	bus-8	-0.593311	7.57719	18.5912	0.000620458	0.0223344	1.65102
WBGene00019022	F58A6.1	0.514028	5.31542	16.776	0.000622668	0.0223831	1.65008
WBGene00003426	msp-19	3.16561	-2.50593	16.0192	0.000624636	0.0224195	1.64937
WBGene00003450	msp-57	3.90324	-2.63146	16.0192	0.000624638	0.0224195	1.64937
WBGene00020436	T12A2.1	-0.48106	3.51444	16.0155	0.000625335	0.0224274	1.64922
WBGene00016147	cyp-32A1	0.998085	2.34228	18.4217	0.000626439	0.0224326	1.64912
WBGene00023408	cex-2	0.43065	4.20073	16.0109	0.000626192	0.0224326	1.64912
WBGene00271796	C54F6.20	1.08769	0.102691	16.003	0.00062768	0.0224599	1.64859
WBGene00008450	E01G6.2	0.465807	3.80074	15.9995	0.000628342	0.0224665	1.64847
WBGene00021113	gsp-3	3.6456	-2.03295	17.7404	0.000629518	0.0224914	1.64798
WBGene00003969	pef-1	0.49825	3.68228	15.9836	0.000631369	0.0225403	1.64704
WBGene00020765	T24C12.3	-0.449446	4.75981	15.9803	0.00063199	0.0225453	1.64694
WBGene00006567	tgt-2	-0.376217	5.15318	15.974	0.000633193	0.022571	1.64645
WBGene00022281	abtm-1	-0.431442	5.453	15.9676	0.000634413	0.0225973	1.64594
WBGene00017881	asp-13	-0.400186	8.35183	15.9619	0.000635519	0.0226196	1.64552
WBGene00006056	sss-1	3.57935	-2.49105	15.9573	0.000636386	0.0226332	1.64525
WBGene00004188	prp-21	-0.385742	6.18892	15.9433	0.000639098	0.0227124	1.64374
WBGene00000082	adt-1	1.27712	5.47822	31.1453	0.000640453	0.0227433	1.64315
WBGene00018051	che-10	-0.541921	6.22366	17.6786	0.000641273	0.0227552	1.64292
WBGene00015761	C14C6.7	3.14725	-2.19541	15.9134	0.000644889	0.0228663	1.64081
WBGene00000981	dhs-18	0.469146	6.03568	16.1578	0.00064709	0.0229269	1.63965
WBGene00044513	nlp-70	0.734064	1.69424	15.8993	0.000647636	0.0229289	1.63962
WBGene00019327	zip-2	0.460253	8.59618	15.8912	0.000649235	0.0229621	1.63899
WBGene00019729	M02D8.3	-0.449305	4.02572	15.8895	0.000649553	0.0229621	1.63899
WBGene00015155	B0353.1	-0.438468	5.24145	15.8703	0.000653348	0.0230789	1.63678
WBGene00010369	chd-1	-0.37134	6.26278	15.8623	0.000654935	0.0231175	1.63606
WBGene00012980	efhd-1	-0.47625	5.51929	16.0106	0.000655922	0.0231349	1.63573
WBGene00018282	F41D9.2	0.503813	4.07515	15.8459	0.000658181	0.0231972	1.63456
WBGene00007130	B0272.4	0.453335	5.33143	15.8358	0.000660208	0.0232511	1.63356
WBGene00002051	ifa-3	-0.771463	2.0214	15.8302	0.000661324	0.0232729	1.63315
WBGene00002006	hsp-2	0.828498	1.67568	15.8241	0.000662557	0.0232814	1.63299
WBGene00003474	mtl-2	3.3466	6.4006	39.1191	0.000662433	0.0232814	1.63299
WBGene00020840	spch-3	3.5749	-2.0668	17.2465	0.000664932	0.0233473	1.63176
WBGene00000716	col-143	1.33193	0.475238	16.6053	0.000666807	0.0233957	1.63086
WBGene00018265	nhr-182	0.482815	3.59215	15.7856	0.000670326	0.0235015	1.6289
WBGene00011813	T16H12.3	-0.407949	4.50367	15.7828	0.000670902	0.0235041	1.62886
WBGene00009773	lipl-2	2.51198	2.54106	33.8147	0.000681578	0.0238603	1.62232
WBGene00015043	cyp-34A8	0.756456	3.22807	17.2088	0.000685683	0.0239861	1.62004
WBGene00001157	ech-8	0.47937	4.37898	15.7005	0.000687872	0.0240121	1.61957
WBGene00006573	tin-10	-0.43626	5.39352	15.7001	0.000687962	0.0240121	1.61957
WBGene00019128	F59G1.4	-0.518626	3.15501	15.7026	0.000687435	0.0240121	1.61957
WBGene00013366	Y60A3A.21	0.552897	3.43567	15.6962	0.000688773	0.0240225	1.61938
WBGene00000796	crn-3	-0.353691	6.40471	15.6836	0.000691414	0.0240967	1.61804
WBGene00000549	cls-2	-0.361933	6.21733	15.6709	0.0006941	0.0241544	1.617
WBGene00016133	C26B9.3	-0.476376	7.11921	16.047	0.000693707	0.0241544	1.617
WBGene00006574	tin-13	-0.445877	6.02501	15.6534	0.000697796	0.0242344	1.61557
WBGene00021060	dct-11	0.536499	3.88202	15.6554	0.000697372	0.0242344	1.61557
WBGene00021425	ppgn-1	-0.364151	6.11735	15.6527	0.000697951	0.0242344	1.61557
WBGene00003053	lmp-1	-0.448793	7.93384	15.648	0.00069895	0.0242511	1.61527
WBGene00008646	F10C2.5	-0.370261	5.22977	15.6289	0.000703031	0.0243747	1.61306
WBGene00001410	feh-1	0.81965	5.44005	22.5022	0.000711135	0.0245776	1.60946
WBGene00007366	C06B3.7	3.92486	2.62938	37.672	0.000711516	0.0245776	1.60946
WBGene00011334	mrps-14	-0.413104	6.07195	15.5872	0.000712034	0.0245776	1.60946
WBGene00016583	tag-335	-0.367691	6.09591	15.5923	0.000710927	0.0245776	1.60946
WBGene00019762	M03F8.3	-0.356302	6.7603	15.59	0.000711421	0.0245776	1.60946
WBGene00022358	Y92H12A.2	0.366272	5.81479	15.5848	0.000712552	0.0245776	1.60946
WBGene00194952	ZK666.14	1.53401	-0.930009	15.5861	0.000712261	0.0245776	1.60946
WBGene00011727	T12A7.6	0.628596	2.79736	15.5695	0.000715877	0.0246741	1.60776
WBGene00009130	F25H5.8	3.25177	-2.66814	15.5557	0.000718907	0.0247603	1.60624
WBGene00005827	srw-80	-1.86479	-1.47509	15.5531	0.000719463	0.0247613	1.60623
WBGene00009344	F32H2.7	3.11988	-2.51284	15.5496	0.000720242	0.0247699	1.60608
WBGene00007698	qns-1	-0.366818	6.0103	15.5432	0.000721664	0.0248006	1.60554
WBGene00009386	tag-290	1.842	2.82648	29.0165	0.000723342	0.0248219	1.60517
WBGene00013343	prp-6	-0.35068	7.29394	15.5369	0.000723034	0.0248219	1.60517
WBGene00007564	mrps-22	-0.360571	6.63282	15.5235	0.000726007	0.0248937	1.60391
WBGene00015488	C05D11.13	-0.482	3.49144	15.5213	0.000726497	0.0248937	1.60391
WBGene00006512	abcf-1	-0.371419	7.62417	15.5121	0.000728538	0.0249025	1.60376
WBGene00013434	Y66D12A.8	-0.448208	4.73197	15.513	0.000728351	0.0249025	1.60376
WBGene00018260	cyp-33C7	0.593208	3.1895	15.5106	0.000728879	0.0249025	1.60376
WBGene00018515	F46G11.2	-0.449151	4.34742	15.5131	0.000728326	0.0249025	1.60376
WBGene00010795	M01A8.1	0.850646	1.42243	15.5072	0.000729647	0.0249105	1.60362
WBGene00012584	ceh-100	-0.3769	5.52958	15.5003	0.000731179	0.0249447	1.60302
WBGene00013836	fbxa-29	0.892423	1.09626	15.4964	0.000732042	0.024956	1.60283
WBGene00008336	C55A6.7	0.577441	3.00184	15.4844	0.000734748	0.02503	1.60154
WBGene00015135	cyp-23A1	-0.574695	3.58419	15.4807	0.000735579	0.0250401	1.60136
WBGene00013678	Y105E8A.20	-0.389147	5.07236	15.4731	0.00073728	0.0250798	1.60068
WBGene00019940	npp-21	-0.39472	7.1993	15.4631	0.00073955	0.0251388	1.59966
WBGene00017591	F19C7.1	-0.417375	7.80351	15.4491	0.000742726	0.0252285	1.59811
WBGene00304783	C31E10.11	-2.93106	-2.22216	15.4464	0.000743335	0.0252309	1.59807
WBGene00016866	coel-1	0.63883	2.41486	15.4432	0.000744069	0.0252375	1.59795
WBGene00012747	Y40H7A.10	0.639523	2.58501	15.4182	0.000749788	0.0253947	1.59526
WBGene00018827	pst-2	-0.398547	4.80936	15.4184	0.000749742	0.0253947	1.59526
WBGene00013447	nars-2	-0.388849	4.74787	15.4028	0.000753355	0.0254971	1.59351
WBGene00011340	ugt-30	0.750006	3.02347	16.3282	0.000754155	0.0255058	1.59336
WBGene00021900	Y54H5A.2	-0.375733	5.69994	15.3953	0.000755085	0.0255188	1.59314
WBGene00013146	Y53C12B.7	0.948615	1.09816	15.3885	0.00075666	0.0255536	1.59255
WBGene00001792	gst-44	1.90644	-1.38491	15.3597	0.000763373	0.0257247	1.58965
WBGene00004180	pri-1	-0.471195	4.43721	15.3635	0.000762483	0.0257247	1.58965
WBGene00012645	mrpl-22	-0.395247	5.74182	15.3605	0.000763184	0.0257247	1.58965
WBGene00012168	W01A8.6	2.10495	4.73875	36.0193	0.000766283	0.0258042	1.58831
WBGene00003590	nex-3	0.471857	3.93737	15.3446	0.000766922	0.0258072	1.58826
WBGene00020626	T20F5.4	-0.789678	4.14674	19.4605	0.000769195	0.0258652	1.58728
WBGene00008659	clec-151	6.54037	-3.38371	15.835	0.000773222	0.0259819	1.58533
WBGene00021735	Y50D4A.1	-0.457608	5.15448	15.3094	0.000775272	0.0260321	1.58449
WBGene00000233	avr-15	0.460318	4.32061	15.2982	0.000777959	0.0261037	1.5833
WBGene00013435	Y66D12A.9	-0.385272	6.11585	15.2789	0.000782583	0.0262359	1.5811
WBGene00044176	C30G7.2	0.511825	4.47599	15.3275	0.000783019	0.0262359	1.5811
WBGene00021397	Y38C1AA.6	0.886183	1.19592	15.2701	0.000784719	0.0262741	1.58047
WBGene00011758	T13H5.4	-0.352537	6.37493	15.267	0.000785457	0.02628	1.58037
WBGene00011269	sbsp-1	0.525387	3.78512	15.2586	0.000787497	0.0263295	1.57956
WBGene00003476	mtm-3	0.390354	6.84471	15.2369	0.000792789	0.0264205	1.57806
WBGene00008258	mans-2	-0.388909	7.06585	15.2445	0.000790932	0.0264205	1.57806
WBGene00011166	chil-22	0.997749	2.6719	18.6184	0.000792197	0.0264205	1.57806
WBGene00012633	Y38H6C.21	-1.97766	-1.16168	15.4422	0.000793213	0.0264205	1.57806
WBGene00015077	B0238.13	1.57282	0.628868	18.2111	0.000793001	0.0264205	1.57806
WBGene00016809	C50D2.6	-0.516267	3.35892	15.2336	0.000793601	0.0264205	1.57806
WBGene00000802	crt-1	-0.462904	11.5099	15.2274	0.000795116	0.0264521	1.57754
WBGene00006613	trm-1	-0.355806	5.88762	15.2251	0.000795679	0.0264521	1.57754
WBGene00020319	npr-31	0.759654	1.61463	15.2162	0.00079787	0.0264952	1.57683
WBGene00021994	Y59E9AL.4	1.131	2.87814	20.7693	0.000798107	0.0264952	1.57683
WBGene00007018	mdt-18	-0.464161	4.49543	15.204	0.000800874	0.0265683	1.57564
WBGene00022754	nspd-1	3.25887	-2.66301	15.1987	0.000802171	0.0265925	1.57524
WBGene00009897	skpo-1	1.00517	0.71543	15.1869	0.000805112	0.0266535	1.57425
WBGene00015291	C01B12.8	-0.786286	1.96912	15.1849	0.000805603	0.0266535	1.57425
WBGene00015919	C17G10.7	0.725342	2.22263	15.1845	0.000805718	0.0266535	1.57425
WBGene00003635	nhr-45	0.355215	5.77612	15.1749	0.000808096	0.026701	1.57347
WBGene00007462	ctsa-3.2	0.895641	1.97562	15.7723	0.000808293	0.026701	1.57347
WBGene00021157	Y4C6B.3	0.746003	2.45303	15.1688	0.000809634	0.0267265	1.57306
WBGene00013954	ZK262.9	6.59929	-3.45299	15.6572	0.000814274	0.0268418	1.57119
WBGene00015512	mthf-1	-0.411365	9.05388	15.1515	0.000813957	0.0268418	1.57119
WBGene00000284	cah-6	0.460005	4.58588	15.1415	0.000816495	0.0268793	1.57058
WBGene00001570	gei-13	-0.652816	7.47119	18.983	0.000816556	0.0268793	1.57058
WBGene00219971	F54G2.4	-2.69317	-1.28418	17.1294	0.000822965	0.0270712	1.56749
WBGene00022575	ZC239.17	-4.26413	-2.75402	15.1118	0.000824017	0.0270868	1.56724
WBGene00010621	egg-6	-0.696937	6.01798	20.0286	0.000825059	0.0271021	1.567
WBGene00004123	pqn-36	1.67151	5.137	33.265	0.000826241	0.0271219	1.56668
WBGene00010034	F54B11.11	-1.47298	3.40688	26.6154	0.000827556	0.027127	1.5666
WBGene00014175	ZK971.1	0.72479	1.5013	15.0986	0.000827386	0.027127	1.5666
WBGene00006832	unc-105	0.357633	5.57391	15.0895	0.000829728	0.0271792	1.56576
WBGene00015306	C01G5.4	6.25742	-3.59276	15.5887	0.000830733	0.0271932	1.56554
WBGene00003375	mlp-1	0.404021	6.58558	15.0828	0.000831454	0.0271978	1.56547
WBGene00007811	C29F7.2	-0.379172	7.19751	15.0676	0.000835371	0.0273069	1.56373
WBGene00015625	C09B8.8	1.03309	0.614683	15.0623	0.000836747	0.0273218	1.56349
WBGene00017204	F07C4.11	1.68467	0.220104	17.6278	0.000837407	0.0273218	1.56349
WBGene00021403	Y38C1AB.1	-1.2006	0.0537316	15.0591	0.000837576	0.0273218	1.56349
WBGene00000931	dao-5	-0.370617	8.69557	15.0449	0.00084128	0.0273854	1.56248
WBGene00004902	snf-3	0.485617	6.69306	15.8257	0.000840238	0.0273854	1.56248
WBGene00007657	pals-3	6.34322	-3.15547	15.5463	0.000841089	0.0273854	1.56248
WBGene00020364	T08E11.8	2.24548	-1.69532	15.0363	0.000843518	0.0274392	1.56163
WBGene00022031	Y65B4A.8	-0.393978	5.18088	15.0272	0.000845903	0.0274977	1.5607
WBGene00006791	unc-57	0.352882	6.11116	15.0238	0.000846806	0.027508	1.56054
WBGene00021638	Y47G6A.9	-0.430164	5.02738	15.0172	0.000848551	0.0275456	1.55995
WBGene00001423	fib-1	-0.40976	10.086	15.0098	0.000850489	0.0275714	1.55954
WBGene00018420	F44E2.7	-0.376756	5.10254	15.0097	0.000850523	0.0275714	1.55954
WBGene00003958	pcp-3	-0.527825	8.01467	16.2844	0.000852282	0.0276093	1.55894
WBGene00001501	ftn-2	-0.472455	8.21445	15.1864	0.000857228	0.0277504	1.55673
WBGene00007591	zipt-13	0.565626	6.44385	17.334	0.000861819	0.0278798	1.55471
WBGene00016351	C33F10.1	3.90918	-2.71034	14.9581	0.000864271	0.0279206	1.55408
WBGene00016888	znf-598	0.369984	6.89193	14.9584	0.000864191	0.0279206	1.55408
WBGene00015574	irg-1	2.91992	3.13694	34.6064	0.000866231	0.0279646	1.55339
WBGene00016608	cogc-5	-0.354367	5.61094	14.9301	0.000871842	0.0281263	1.55089
WBGene00007609	C15C8.7	0.57298	3.34976	14.9263	0.000872871	0.0281402	1.55067
WBGene00021610	nhr-237	-0.748257	1.5377	14.9178	0.000875168	0.0281948	1.54983
WBGene00010902	M79.2	-0.440757	4.93677	14.9114	0.000876914	0.0282317	1.54926
WBGene00008451	cest-3	-0.493858	3.64188	14.9079	0.000877877	0.0282433	1.54908
WBGene00017060	D2063.1	0.556893	3.38618	14.9049	0.000878689	0.02825	1.54898
WBGene00010709	nol-9	-0.414365	4.44791	14.8994	0.000880198	0.0282791	1.54853
WBGene00010446	K01A6.4	-1.36572	-0.0929855	14.8792	0.000885768	0.0284386	1.54609
WBGene00003612	nhr-13	0.499745	3.50632	14.8709	0.000888052	0.0284924	1.54527
WBGene00017519	hpo-25	-1.56795	-1.12553	14.867	0.000889148	0.028498	1.54519
WBGene00044898	let-383	0.647452	2.53563	14.8659	0.000889441	0.028498	1.54519
WBGene00004218	ptr-3	1.54823	4.59508	30.726	0.000891072	0.0285308	1.54469
WBGene00004904	snf-5	1.65859	-1.17012	14.8477	0.000894519	0.0286216	1.54331
WBGene00003779	nob-1	0.592702	2.48677	14.8428	0.000895873	0.0286453	1.54295
WBGene00011237	gkow-1	-0.391675	4.98023	14.8346	0.000898181	0.0286996	1.54212
WBGene00018769	mnat-1	-0.371657	5.90725	14.8278	0.000900079	0.0287406	1.5415
WBGene00015423	C04E6.7	0.51175	3.86611	14.7986	0.000908334	0.0289844	1.53784
WBGene00220000	K02F2.11	-1.17553	0.073336	14.7941	0.000909603	0.0290052	1.53752
WBGene00017376	F11C7.2	-0.442375	4.04596	14.7881	0.000911313	0.02904	1.537
WBGene00003071	lrp-1	-0.431154	8.3833	14.7787	0.000914003	0.0290439	1.53695
WBGene00004997	spp-12	3.44925	0.498792	28.0776	0.000916038	0.0290439	1.53695
WBGene00009711	F44G4.1	-0.351913	6.5878	14.7769	0.000914499	0.0290439	1.53695
WBGene00011950	T23F6.2	1.5923	-0.796304	14.773	0.000915618	0.0290439	1.53695
WBGene00013826	Y116F11B.10	0.99743	0.760006	14.7736	0.000915468	0.0290439	1.53695
WBGene00016837	syf-1	-0.371377	6.68778	14.766	0.000917632	0.0290439	1.53695
WBGene00017950	F31E3.2	0.440207	3.92528	14.7739	0.000915378	0.0290439	1.53695
WBGene00018133	F37A4.3	-0.547468	4.19054	15.0956	0.000917089	0.0290439	1.53695
WBGene00018170	nspb-1	2.61391	2.0694	30.2393	0.00091518	0.0290439	1.53695
WBGene00021297	fbxc-55	2.31048	-2.16804	14.7692	0.000916721	0.0290439	1.53695
WBGene00021382	Y37F4.1	1.05433	0.518236	14.7567	0.000920306	0.0291089	1.53597
WBGene00015509	C06A6.4	-0.366797	5.93889	14.7483	0.000922732	0.0291659	1.53512
WBGene00013937	ZK218.3	6.3914	-3.20799	15.2214	0.00092547	0.0292327	1.53413
WBGene00001456	flp-13	0.409097	4.83546	14.7295	0.000928166	0.0292982	1.53316
WBGene00011102	R07E3.1	-0.36577	8.32448	14.724	0.000929772	0.0293094	1.53299
WBGene00019738	clec-265	-0.434407	5.70893	14.7255	0.000929352	0.0293094	1.53299
WBGene00007772	egrh-1	0.414855	4.80084	14.691	0.00093945	0.0295946	1.52879
WBGene00004154	pqn-72	1.65016	5.06876	31.8167	0.000942785	0.0296228	1.52837
WBGene00007251	nspb-9	2.56229	-0.596752	18.9797	0.000941514	0.0296228	1.52837
WBGene00021628	Y47D9A.1	-0.371288	7.12043	14.6794	0.000942875	0.0296228	1.52837
WBGene00022386	Y95B8A.6	0.527142	2.82154	14.6816	0.000942211	0.0296228	1.52837
WBGene00019146	H02F09.3	-1.0279	2.80389	18.5174	0.000944201	0.0296446	1.52805
WBGene00009778	F46C5.1	1.82363	0.953917	20.4654	0.000949787	0.0298	1.52578
WBGene00002118	ins-35	-0.618032	3.88467	15.6409	0.00095068	0.0298081	1.52567
WBGene00014123	elpc-3	-0.383225	5.54623	14.6461	0.00095278	0.0298141	1.52558
WBGene00020760	T24C4.4	1.57026	2.72921	24.474	0.000951943	0.0298141	1.52558
WBGene00023483	Y75B8A.39	2.55104	-2.34656	14.6465	0.000952639	0.0298141	1.52558
WBGene00003066	lpl-1	-0.356292	5.60269	14.6305	0.000957465	0.0299407	1.52374
WBGene00011146	pde-2	0.372022	6.45926	14.6246	0.000959239	0.0299762	1.52322
WBGene00000411	cdl-1	-0.356749	5.79543	14.6141	0.000962386	0.0300355	1.52237
WBGene00001766	gst-18	-1.2948	-0.759509	14.614	0.000962416	0.0300355	1.52237
WBGene00018952	F56C9.8	0.439847	3.96589	14.599	0.00096698	0.0301578	1.5206
WBGene00017313	cpsf-2	-0.346612	5.62367	14.5922	0.000969055	0.0301992	1.52
WBGene00019294	K02A6.3	0.376704	4.83139	14.5904	0.000969595	0.0301992	1.52
WBGene00013276	sre-42	1.57424	-1.29116	14.5789	0.00097312	0.0302585	1.51915
WBGene00015544	C06E8.5	2.43547	5.05399	33.7991	0.000973093	0.0302585	1.51915
WBGene00022083	Y69A2AR.12	-3.53437	0.2713	16.1789	0.000973436	0.0302585	1.51915
WBGene00002010	hsp-6	-0.383985	9.63393	14.5702	0.000975793	0.0303117	1.51839
WBGene00013562	Y75B8A.32	0.765458	1.519	14.5595	0.000979058	0.0303929	1.51723
WBGene00020613	T20D4.7	1.38906	-0.226232	14.5525	0.000981239	0.0304405	1.51655
WBGene00008394	D1086.7	6.5275	-3.55439	15.0157	0.000983705	0.0304968	1.51575
WBGene00002299	let-23	0.476579	4.37127	14.5424	0.000984358	0.0304969	1.51574
WBGene00015225	B0507.8	1.05185	0.668544	14.5353	0.000986559	0.0305449	1.51506
WBGene00003182	mef-2	0.452264	5.20365	14.5327	0.000987385	0.0305503	1.51498
WBGene00013969	tep-1	-0.405132	7.53742	14.5273	0.000989051	0.0305713	1.51469
WBGene00044638	F23A7.8	-0.965352	3.20431	18.845	0.00098937	0.0305713	1.51469
WBGene00000441	ceh-18	0.34745	5.80045	14.5118	0.0009939	0.0306321	1.51382
WBGene00001448	flp-5	0.371862	4.83494	14.5019	0.000997001	0.0306321	1.51382
WBGene00001603	gln-2	2.59294	-2.48426	14.5092	0.000994711	0.0306321	1.51382
WBGene00020691	igdb-3	0.630197	2.98602	14.5094	0.000994635	0.0306321	1.51382
WBGene00020788	nep-22	-0.385954	8.48127	14.5178	0.000992023	0.0306321	1.51382
WBGene00021828	Y54E10A.6	-0.38202	5.16954	14.5042	0.000996293	0.0306321	1.51382
WBGene00022168	Y71H2AM.3	0.496619	4.76057	14.8824	0.000997218	0.0306321	1.51382
WBGene00022248	Y73B6BL.27	0.428971	3.92971	14.5015	0.000997126	0.0306321	1.51382
WBGene00044291	C25F9.10	0.564012	2.81695	14.5074	0.00099529	0.0306321	1.51382
WBGene00003979	pes-5	-0.583068	3.01864	14.4983	0.000998139	0.0306332	1.51381
WBGene00004035	pkd-2	-1.98818	-1.33372	14.497	0.000998562	0.0306332	1.51381
WBGene00001815	hmt-1	-0.367688	6.11203	14.4936	0.000999633	0.030646	1.51363
WBGene00019895	aagr-2	-0.375264	7.96133	14.4908	0.0010005	0.0306525	1.51353
WBGene00022493	mrpl-45	-0.362848	6.1304	14.4814	0.00100347	0.0307235	1.51253
WBGene00013096	mcd-1	-0.358767	5.39266	14.4711	0.00100673	0.0308031	1.51141
WBGene00001829	hcp-1	-0.415327	5.43806	14.4581	0.00101087	0.0308896	1.51019
WBGene00020811	T25G12.3	1.22694	3.62211	23.3762	0.00101051	0.0308896	1.51019
WBGene00000696	col-122	2.4665	0.949424	24.5545	0.00102213	0.0311931	1.50594
WBGene00002258	lbp-6	-0.400663	8.53013	14.4247	0.0010216	0.0311931	1.50594
WBGene00044071	dhhc-14	0.71378	5.51485	19.2433	0.00102805	0.0313532	1.50372
WBGene00020736	T23F2.3	0.508981	3.3446	14.4015	0.00102912	0.0313653	1.50355
WBGene00016980	C56G2.5	2.34112	-2.21778	14.3992	0.00102987	0.0313679	1.50352
WBGene00016660	C45B2.3	-2.1737	-1.1927	14.7763	0.00103321	0.0314492	1.50239
WBGene00016095	C25E10.5	0.728941	3.39666	16.0911	0.00103415	0.0314574	1.50228
WBGene00020639	fbxa-71	2.35003	-2.15266	14.3699	0.00103949	0.0315994	1.50032
WBGene00009647	phlp-2	-0.783502	2.01203	14.3612	0.00104234	0.0316655	1.49941
WBGene00013201	dus-2	-0.360123	4.7888	14.354	0.00104472	0.0317171	1.49871
WBGene00007000	tufm-1	-0.367547	9.13025	14.3468	0.0010471	0.0317688	1.498
WBGene00008102	C44H9.7	1.66248	-0.5742	14.3431	0.00104834	0.0317859	1.49777
WBGene00003444	msp-51	3.36381	-2.56671	14.3379	0.00105008	0.0318179	1.49733
WBGene00021526	Y41G9A.2	-0.878908	1.71956	14.4327	0.00105301	0.0318863	1.4964
WBGene00015972	C18E3.3	0.44447	4.16493	14.3188	0.00105644	0.0319516	1.49551
WBGene00019636	gsto-3	0.75251	3.84118	17.2491	0.00105653	0.0319516	1.49551
WBGene00004873	smc-3	-0.349917	6.1172	14.3152	0.00105766	0.031965	1.49533
WBGene00015405	C03H5.3	-0.373195	5.26361	14.3068	0.00106048	0.0320296	1.49445
WBGene00007165	B0391.10	-0.674057	1.82476	14.2999	0.00106281	0.032038	1.49433
WBGene00008205	sams-1	-0.414399	10.5138	14.301	0.00106245	0.032038	1.49433
WBGene00020741	dlhd-1	0.750366	1.85032	14.3034	0.00106163	0.032038	1.49433
WBGene00016654	C44E4.5	-0.381871	4.70683	14.2974	0.00106365	0.0320427	1.49427
WBGene00007683	C18E9.2	-0.356227	6.79463	14.2725	0.00107209	0.0322414	1.49159
WBGene00011231	R11A5.3	-1.48814	-0.418178	14.2742	0.00107152	0.0322414	1.49159
WBGene00018117	nlp-47	0.403468	4.2329	14.2719	0.00107231	0.0322414	1.49159
WBGene00012866	afmd-2	-0.463834	3.49148	14.2697	0.00107305	0.0322432	1.49156
WBGene00044138	sssh-1	-0.748931	1.51146	14.2638	0.00107507	0.032283	1.49103
WBGene00001770	gst-22	0.915151	3.14786	17.8454	0.00107672	0.0323118	1.49064
WBGene00015581	C07H6.4	-0.366546	6.37444	14.2457	0.00108125	0.0324273	1.48909
WBGene00012145	nlp-46	0.85154	0.817312	14.2402	0.00108316	0.0324635	1.4886
WBGene00004373	rme-1	-0.376028	8.06399	14.2272	0.00108764	0.032519	1.48786
WBGene00004405	rop-1	0.371864	7.26768	14.2258	0.00108814	0.032519	1.48786
WBGene00004926	snt-6	0.430014	3.71687	14.2256	0.00108818	0.032519	1.48786
WBGene00010304	clpf-1	-0.385437	4.7231	14.2248	0.00108847	0.032519	1.48786
WBGene00194642	C25H3.17	-0.604082	2.49537	14.2291	0.00108698	0.032519	1.48786
WBGene00007768	C27C7.5	-2.02864	-1.63074	14.2195	0.0010903	0.0325529	1.48741
WBGene00000680	col-106	2.0633	0.472839	19.9519	0.00109245	0.0325922	1.48689
WBGene00009636	F42F12.4	0.557032	3.10626	14.2117	0.00109301	0.0325922	1.48689
WBGene00012995	Y48C3A.14	-0.339409	6.09213	14.2045	0.00109555	0.032647	1.48616
WBGene00013652	sams-2	-0.824361	1.67234	14.1945	0.00109902	0.0327297	1.48506
WBGene00021852	Y54F10AM.8	-0.371291	8.77288	14.1914	0.00110011	0.0327414	1.4849
WBGene00008476	E03H4.8	1.73949	4.37273	29.9507	0.00110575	0.0328675	1.48323
WBGene00020497	T14A8.2	1.23853	4.792	26.232	0.00110507	0.0328675	1.48323
WBGene00003756	nlp-18	0.349254	5.35426	14.1658	0.00110913	0.0329278	1.48244
WBGene00004859	sma-5	0.626968	6.23556	17.746	0.00110918	0.0329278	1.48244
WBGene00007252	mlt-2	-0.418647	4.14934	14.1332	0.00112072	0.0331653	1.47932
WBGene00010698	K08H10.6	0.771167	2.86072	15.3611	0.00111836	0.0331653	1.47932
WBGene00013636	Y105C5A.12	-2.22167	-0.82496	14.41	0.00112015	0.0331653	1.47932
WBGene00022751	msrp-2	3.74796	-1.97532	16.6171	0.00112015	0.0331653	1.47932
WBGene00044901	Y41G9A.10	-0.803909	1.45101	14.1361	0.00111966	0.0331653	1.47932
WBGene00009398	nspb-11	1.72529	2.51694	24.3741	0.00112255	0.0331985	1.47888
WBGene00009895	scl-2	1.52395	4.67415	28.8634	0.00112704	0.0333102	1.47742
WBGene00000937	dbr-1	-0.388866	5.16391	14.1048	0.00113093	0.0333263	1.47721
WBGene00011895	T21C9.9	2.00773	5.49946	31.679	0.00112951	0.0333263	1.47721
WBGene00017163	dnpp-1	-0.374682	7.58517	14.1048	0.00113091	0.0333263	1.47721
WBGene00020634	acs-9	0.699051	1.81825	14.1022	0.00113185	0.0333263	1.47721
WBGene00022545	ZC196.1	1.24699	-0.266395	14.1094	0.00112927	0.0333263	1.47721
WBGene00022861	dve-1	0.39745	5.70224	14.1026	0.0011317	0.0333263	1.47721
WBGene00003597	nhl-1	0.381906	6.07109	14.0965	0.00113392	0.0333663	1.47669
WBGene00000798	crn-5	-0.432615	4.22702	14.0911	0.00113588	0.0333819	1.47649
WBGene00009439	mlcd-1	0.445627	3.5918	14.093	0.00113519	0.0333819	1.47649
WBGene00044772	T23E7.6	-0.891229	1.83601	14.545	0.00113679	0.0333878	1.47641
WBGene00045461	C25F9.14	0.657872	2.45587	14.0684	0.00114413	0.0335825	1.47389
WBGene00002273	lec-10	-0.390009	8.32799	14.0343	0.00115669	0.0339206	1.46954
WBGene00020618	T20D4.12	0.542549	3.24038	14.0332	0.0011571	0.0339206	1.46954
WBGene00009731	exo-1	-0.454817	4.10052	14.0272	0.00115934	0.033965	1.46897
WBGene00020468	T13A10.1	-1.1001	-0.243336	14.0233	0.00116079	0.0339864	1.46869
WBGene00007409	C07B5.4	0.433963	3.93428	14.0049	0.00116764	0.0341654	1.46641
WBGene00019498	K07E8.7	-0.419308	4.21676	13.99	0.00117322	0.0343073	1.46461
WBGene00004076	pod-2	-0.549037	9.1993	15.5619	0.00117657	0.0343839	1.46364
WBGene00016500	memo-1	0.35666	5.15059	13.9739	0.00117931	0.0344424	1.46291
WBGene00011113	R07E5.5	1.39934	-0.190358	14.1259	0.00118346	0.0345309	1.46179
WBGene00016920	C54E4.5	-0.410156	4.49795	13.962	0.00118381	0.0345309	1.46179
WBGene00009985	F53F4.1	1.0396	0.0360459	13.9558	0.00118618	0.0345569	1.46147
WBGene00014189	nhr-245	-1.32678	0.28266	14.4597	0.00118564	0.0345569	1.46147
WBGene00018210	F39G3.5	-0.434726	4.39161	13.9381	0.00119293	0.0347321	1.45927
WBGene00004998	spp-13	-0.80085	5.68592	20.3124	0.00120084	0.0349041	1.45712
WBGene00013771	Y113G7C.1	1.84904	-1.54743	13.9189	0.0012003	0.0349041	1.45712
WBGene00022783	tomm-7	-0.467396	3.9245	13.9169	0.00120107	0.0349041	1.45712
WBGene00016636	perm-2	2.32032	-1.77714	13.937	0.00120334	0.0349485	1.45657
WBGene00016611	bicd-1	-0.412951	7.13284	13.898	0.00120839	0.0350516	1.45529
WBGene00021398	Y38C1AA.7	2.18719	-2.03938	13.8994	0.00120786	0.0350516	1.45529
WBGene00001030	dnj-12	-0.369454	8.48176	13.894	0.00120994	0.0350749	1.455
WBGene00009070	F23A7.5	0.926913	0.536795	13.8764	0.00121683	0.0352526	1.45281
WBGene00007610	C15H7.3	6.42158	-3.6963	14.3009	0.00122	0.0353008	1.45222
WBGene00020498	T14B4.1	-0.357068	6.11658	13.8698	0.0012194	0.0353008	1.45222
WBGene00015334	sup-18	0.595071	2.79464	13.8576	0.00122419	0.0354003	1.45099
WBGene00017453	F14D2.5	-5.81689	-2.95759	14.2849	0.00122596	0.0354296	1.45063
WBGene00002211	kin-30	0.803806	1.35986	13.847	0.00122838	0.0354778	1.45004
WBGene00015583	C08A9.3	4.42821	-3.12451	13.8188	0.0012396	0.0357722	1.44645
WBGene00019908	R05H11.2	0.66098	3.13696	14.2879	0.0012401	0.0357722	1.44645
WBGene00021004	sftb-2	-0.366303	7.37152	13.8129	0.00124195	0.0358033	1.44608
WBGene00008358	nspc-18	-0.552247	3.64506	13.7982	0.00124786	0.0359517	1.44428
WBGene00007295	C04C11.1	0.917503	0.701442	13.7891	0.00125154	0.0360357	1.44327
WBGene00009164	hrdl-1	0.359638	5.66326	13.7807	0.00125491	0.0361105	1.44237
WBGene00007808	best-7	-0.624599	2.94973	13.777	0.00125642	0.0361316	1.44211
WBGene00008858	pals-1	-1.03805	0.472763	13.771	0.00125885	0.0361793	1.44154
WBGene00019846	gpx-7	-0.535794	3.28554	13.765	0.00126128	0.0362049	1.44123
WBGene00019901	R05G6.9	-0.794784	4.75042	19.1299	0.00126099	0.0362049	1.44123
WBGene00017357	F10E9.5	-0.524859	2.77765	13.7625	0.00126231	0.0362122	1.44114
WBGene00022297	Y76B12C.3	-0.402804	5.42875	13.7505	0.00126723	0.036309	1.43999
WBGene00255736	C03H5.10	-0.882816	1.51023	13.7519	0.00126663	0.036309	1.43999
WBGene00007180	B0457.6	0.510622	3.6667	13.7476	0.0012684	0.0363202	1.43985
WBGene00007307	spch-1	2.9371	-1.7397	15.4844	0.00127152	0.0363729	1.43922
WBGene00023480	srz-68	-5.94955	-3.39257	14.1648	0.00127179	0.0363729	1.43922
WBGene00013958	nol-16	-0.37171	5.87364	13.7272	0.00127679	0.0364937	1.43778
WBGene00002203	kin-20	0.390068	7.55126	13.7168	0.00128112	0.036595	1.43658
WBGene00022758	ZK488.6	2.27817	-2.18654	13.7078	0.00128482	0.0366785	1.43559
WBGene00003796	npp-10	-0.337698	7.45868	13.6989	0.00128853	0.0367618	1.4346
WBGene00018269	acs-11	0.359997	5.62625	13.6936	0.00129073	0.0368024	1.43412
WBGene00004196	prx-11	0.460806	4.19817	13.6813	0.00129589	0.0369164	1.43278
WBGene00018836	F54F2.9	-0.369557	4.81628	13.6784	0.0012971	0.0369164	1.43278
WBGene00021715	Y49F6B.2	-0.355751	5.19999	13.68	0.00129646	0.0369164	1.43278
WBGene00001479	fmo-4	-1.34046	8.59753	26.6887	0.00131286	0.0373137	1.42813
WBGene00020397	pcbd-1	0.438408	4.35642	13.6419	0.00131256	0.0373137	1.42813
WBGene00194670	K07E3.9	2.96413	-2.84263	13.6398	0.00131344	0.0373137	1.42813
WBGene00010334	del-5	0.555331	2.8736	13.6357	0.00131518	0.037318	1.42808
WBGene00017515	F16F9.4	0.427812	5.07841	13.6369	0.00131467	0.037318	1.42808
WBGene00020993	W03F8.3	-0.352022	5.0825	13.6301	0.00131757	0.0373629	1.42756
WBGene00001001	dis-3	-0.337146	6.74593	13.6119	0.00132537	0.0375389	1.42552
WBGene00012156	ebp-2	-0.427149	5.77537	13.613	0.00132489	0.0375389	1.42552
WBGene00008961	F19H6.6	-1.31572	-0.775908	13.6063	0.0013278	0.037585	1.42499
WBGene00021546	laat-1	-0.363098	6.0097	13.5853	0.00133686	0.0378186	1.4223
WBGene00003571	ncx-6	-0.696707	1.82059	13.5802	0.00133908	0.0378424	1.42202
WBGene00010780	K11H3.3	-0.442153	7.04635	13.8691	0.00133932	0.0378424	1.42202
WBGene00015767	hex-2	-0.358833	6.60677	13.5741	0.00134175	0.0378884	1.42149
WBGene00001560	gei-3	0.366525	6.22505	13.5664	0.00134509	0.0378913	1.42146
WBGene00006679	twk-26	-0.495923	3.17051	13.5673	0.0013447	0.0378913	1.42146
WBGene00013884	ZC412.3	-0.353341	6.53937	13.5684	0.00134423	0.0378913	1.42146
WBGene00018762	F53E10.6	-0.371005	5.72367	13.5697	0.00134368	0.0378913	1.42146
WBGene00013136	tmem-189	-0.358015	5.35143	13.5609	0.00134753	0.0379372	1.42093
WBGene00007101	B0024.11	-0.339424	6.0943	13.5524	0.00135123	0.0379779	1.42047
WBGene00009429	irg-5	-2.21116	3.89653	29.285	0.00135216	0.0379779	1.42047
WBGene00009816	F47B10.5	-0.567413	2.92171	13.5502	0.00135222	0.0379779	1.42047
WBGene00010111	F55D12.2	0.38399	6.15858	13.5535	0.00135076	0.0379779	1.42047
WBGene00013852	hhat-1	-0.546373	6.30019	15.7232	0.00135537	0.0380253	1.41993
WBGene00016356	C33F10.8	4.63175	-3.3665	13.5408	0.00135634	0.0380253	1.41993
WBGene00016429	C35A11.2	-0.974915	3.17362	17.8373	0.00135631	0.0380253	1.41993
WBGene00021979	Y58A7A.5	3.33979	3.04146	29.8194	0.00136032	0.0381142	1.41891
WBGene00007430	C08B6.10	0.732671	3.54628	15.7029	0.00136227	0.038125	1.41879
WBGene00008518	irld-2	1.02593	0.322499	13.5254	0.00136315	0.038125	1.41879
WBGene00013540	cest-12	1.51423	4.56207	27.0907	0.0013624	0.038125	1.41879
WBGene00021430	Y38F2AR.12	-0.333791	5.99565	13.523	0.00136421	0.0381321	1.41871
WBGene00001699	grd-10	1.2995	5.97284	26.6581	0.00136526	0.0381387	1.41863
WBGene00020770	eat-17	-0.445977	6.16768	13.9541	0.00136899	0.0382201	1.41771
WBGene00077629	K10G4.13	3.97159	-2.57483	14.1524	0.00136984	0.0382211	1.4177
WBGene00016659	C45B2.2	-1.40747	6.1534	27.5298	0.001371	0.0382305	1.41759
WBGene00017798	slc-17.8	0.833446	4.39075	18.6876	0.00137536	0.0383294	1.41647
WBGene00002229	klp-19	-0.379832	5.90899	13.4888	0.00137951	0.038385	1.41584
WBGene00016061	hpo-15	0.85819	6.29333	20.9054	0.00137974	0.038385	1.41584
WBGene00016749	C48E7.1	-0.748733	6.99822	19.053	0.00137981	0.038385	1.41584
WBGene00009081	F23B12.4	0.557895	6.09554	15.8537	0.0013847	0.0384983	1.41456
WBGene00003448	msp-55	3.35406	-2.66001	13.4748	0.00138581	0.0385062	1.41447
WBGene00006193	str-146	1.33069	-0.66837	13.4548	0.00139487	0.038735	1.4119
WBGene00016796	cec-2	0.559353	2.67726	13.4528	0.0013958	0.0387378	1.41187
WBGene00017530	mfsd-12	-0.463028	3.8773	13.45	0.00139705	0.0387457	1.41178
WBGene00017962	fbxa-72	-0.426417	6.37798	13.5636	0.00139774	0.0387457	1.41178
WBGene00010845	M03C11.8	-0.338424	6.34105	13.4436	0.00139999	0.0387851	1.41133
WBGene00017195	glo-4	0.343085	5.72969	13.4361	0.00140341	0.0388571	1.41053
WBGene00006610	tre-4	-0.414016	3.99846	13.4267	0.0014077	0.0389297	1.40972
WBGene00013900	ugt-18	2.90091	2.71181	28.8551	0.00140741	0.0389297	1.40972
WBGene00022845	ZK1055.4	-0.639598	2.6537	13.4201	0.00141075	0.0389912	1.40903
WBGene00021986	Y59C2A.3	-0.581001	5.41821	15.844	0.00141555	0.0391007	1.40781
WBGene00016565	C41D11.6	0.669863	1.64814	13.4054	0.00141756	0.03911	1.40771
WBGene00020116	moa-1	3.03796	-2.51143	13.4062	0.00141716	0.03911	1.40771
WBGene00002012	hsp-12.3	-1.53794	-0.689336	13.4033	0.0014185	0.039113	1.40768
WBGene00003524	nas-5	0.89337	1.16081	13.3743	0.00143204	0.0394631	1.40381
WBGene00001635	gly-10	-0.335919	6.30591	13.3684	0.00143479	0.0394693	1.40374
WBGene00014714	C54C8.8	2.10964	-1.88028	13.372	0.00143311	0.0394693	1.40374
WBGene00044397	nspc-8	-2.00854	-1.9878	13.37	0.00143402	0.0394693	1.40374
WBGene00013150	pole-4	-0.54715	4.16725	13.9977	0.00143699	0.0395066	1.40333
WBGene00011871	T20G5.9	-0.453225	3.748	13.3615	0.00143802	0.0395119	1.40327
WBGene00001569	meg-3	-1.01184	1.19042	13.8393	0.00144866	0.039768	1.40047
WBGene00018462	F45E1.1	0.492295	3.51724	13.3364	0.00144989	0.039768	1.40047
WBGene00303367	Y49F6A.12	6.49782	-3.64534	14.2598	0.00144921	0.039768	1.40047
WBGene00018164	sup-36	0.407448	4.1933	13.3321	0.00145192	0.0398004	1.40011
WBGene00000597	col-8	2.14291	-0.878895	15.2711	0.00145477	0.0398551	1.39952
WBGene00008532	dpt-1	-0.326733	7.26051	13.3172	0.00145904	0.0399438	1.39855
WBGene00015660	catp-3	-2.03675	5.31464	28.894	0.00145971	0.0399438	1.39855
WBGene00016601	acin-1	-0.365989	6.48747	13.3076	0.00146364	0.0400281	1.39763
WBGene00016423	tag-275	-0.547685	3.81103	13.4807	0.00146851	0.040138	1.39644
WBGene00001623	glt-5	0.505153	3.65682	13.2919	0.00147118	0.0401875	1.39591
WBGene00009479	fcp-1	-0.357613	5.22727	13.2891	0.00147255	0.0402013	1.39576
WBGene00015811	C16A3.6	-0.354429	6.9837	13.2802	0.00147682	0.0402944	1.39476
WBGene00015328	C02B10.3	0.403096	6.24549	13.2756	0.00147906	0.0403321	1.39435
WBGene00003470	msp-152	3.11201	-2.51264	13.272	0.00148084	0.0403572	1.39408
WBGene00007942	idh-2	-0.343282	6.6976	13.2647	0.00148439	0.0404305	1.39329
WBGene00021725	bath-9	-1.1622	-0.423449	13.2603	0.00148651	0.0404646	1.39292
WBGene00015044	cyp-34A9	0.56375	3.32819	13.2569	0.00148815	0.0404858	1.3927
WBGene00009384	piit-1	1.56495	3.5805	24.637	0.00149449	0.0405877	1.39161
WBGene00013670	hpo-13	-0.330476	6.74788	13.2447	0.00149416	0.0405877	1.39161
WBGene00014095	gdh-1	-0.387978	11.0639	13.2461	0.00149347	0.0405877	1.39161
WBGene00015988	lido-18	1.79345	-1.17571	13.242	0.00149549	0.0405911	1.39157
WBGene00020195	T03G6.3	0.387651	6.39738	13.24	0.00149646	0.0405942	1.39154
WBGene00003769	nlp-31	-0.454133	4.81114	13.2914	0.00149766	0.0406032	1.39144
WBGene00002915	let-805	-0.460704	8.75679	13.5705	0.00150624	0.0407512	1.38986
WBGene00007064	rga-9	0.344694	5.58036	13.2194	0.0015066	0.0407512	1.38986
WBGene00019452	K06H6.4	6.33348	-3.58851	13.6173	0.00150619	0.0407512	1.38986
WBGene00304798	F31B9.8	-2.05161	0.294401	13.2238	0.00150442	0.0407512	1.38986
WBGene00003861	oig-3	0.893671	2.56899	15.3243	0.00151077	0.0408405	1.38891
WBGene00022463	elpc-1	-0.319156	6.305	13.1739	0.00152932	0.0413182	1.38386
WBGene00021805	Y53G8AM.5	2.12029	-1.86263	13.132	0.00155059	0.0418685	1.37811
WBGene00001566	acdh-13	-0.362549	6.09088	13.1277	0.00155278	0.0419035	1.37775
WBGene00007402	ugt-60	-0.591368	5.09695	15.5442	0.00155631	0.0419747	1.37701
WBGene00012032	T26C5.2	-0.898234	7.31291	20.7904	0.00155848	0.042009	1.37666
WBGene00001080	dpy-21	-0.382058	6.51865	13.1048	0.00156455	0.0421484	1.37522
WBGene00006366	sym-1	-1.06208	9.03575	22.3371	0.00157246	0.0422887	1.37378
WBGene00014186	nhr-244	-1.54757	1.58806	17.4419	0.00157177	0.0422887	1.37378
WBGene00019089	clec-206	-2.2033	3.0702	26.7376	0.00157091	0.0422887	1.37378
WBGene00012346	W08G11.1	-0.607696	2.95574	13.0794	0.00157771	0.0424056	1.37258
WBGene00020510	T14G11.1	0.386122	4.3711	13.0767	0.00157912	0.0424189	1.37244
WBGene00009854	clec-31	0.812995	1.54652	13.071	0.0015821	0.0424748	1.37187
WBGene00000251	bli-1	1.83777	1.36387	20.025	0.00158526	0.0424865	1.37175
WBGene00014088	ZK809.8	0.524396	5.57783	14.7072	0.00158388	0.0424865	1.37175
WBGene00019451	nstp-7	6.39425	-3.6962	13.4547	0.00158473	0.0424865	1.37175
WBGene00010085	F55B11.3	4.41673	-3.11889	13.0523	0.0015919	0.0426401	1.37018
WBGene00006493	ivns-1	0.323865	7.61174	13.048	0.00159418	0.0426768	1.36981
WBGene00009485	F36G9.3	1.06341	1.62074	14.7811	0.00159806	0.0427564	1.369
WBGene00000563	cng-3	1.03927	0.129972	13.0268	0.00160541	0.0429283	1.36726
WBGene00018987	lgl-1	-0.39003	4.98777	13.0166	0.00161083	0.0430489	1.36604
WBGene00001745	gsa-1	-0.425106	6.17863	13.2081	0.0016138	0.0430863	1.36566
WBGene00016836	C50F2.2	-0.415212	4.69936	13.0104	0.00161412	0.0430863	1.36566
WBGene00043702	Y54G2A.7	0.750321	1.29208	13.0088	0.00161499	0.0430863	1.36566
WBGene00018392	insc-1	0.427242	3.95739	12.9974	0.0016211	0.0432247	1.36427
WBGene00014252	ZK1320.2	0.367966	6.37038	12.9856	0.00162742	0.0433668	1.36284
WBGene00021300	Y27F2A.9	-5.58777	-3.32297	13.3684	0.00162828	0.0433668	1.36284
WBGene00011094	R07B7.10	-0.41004	3.74629	12.9822	0.00162927	0.0433685	1.36283
WBGene00006353	sur-7	-0.382381	4.77738	12.9773	0.00163191	0.0434073	1.36244
WBGene00013497	hex-5	0.429287	3.87719	12.9761	0.00163258	0.0434073	1.36244
WBGene00008624	crld-1	-0.321049	5.87902	12.9629	0.00163971	0.0435452	1.36106
WBGene00009586	F40F9.10	-0.507223	3.66148	12.9644	0.00163888	0.0435452	1.36106
WBGene00017472	cst-1	-0.384779	4.24366	12.9597	0.00164148	0.0435452	1.36106
WBGene00194707	C53A5.17	-0.391556	4.46367	12.9604	0.0016411	0.0435452	1.36106
WBGene00004232	ptr-18	-0.76762	7.44899	18.5573	0.0016497	0.0436613	1.3599
WBGene00008669	acs-14	0.383706	7.19714	12.9484	0.00164763	0.0436613	1.3599
WBGene00012452	Y17D7B.4	-0.436468	4.0139	12.9446	0.00164969	0.0436613	1.3599
WBGene00012471	Y17G7B.20	-0.348797	8.07597	12.9431	0.00165051	0.0436613	1.3599
WBGene00015279	cest-5.1	0.611572	2.1593	12.947	0.00164839	0.0436613	1.3599
WBGene00045411	C25F9.11	1.98632	3.40446	25.9964	0.00165373	0.0437218	1.3593
WBGene00009645	F42G10.1	0.430312	4.72573	12.9332	0.00165593	0.0437551	1.35897
WBGene00017291	F09E5.14	0.699171	1.99039	12.9252	0.00166032	0.0438466	1.35806
WBGene00020393	T10B5.7	-0.39926	5.37359	12.9224	0.00166187	0.0438626	1.35791
WBGene00013893	coa-6	-0.329773	5.30288	12.9162	0.00166534	0.0439295	1.35724
WBGene00002992	lin-3	0.622615	2.90274	12.9024	0.00167295	0.0441054	1.35551
WBGene00002120	ins-37	-2.21331	-2.2078	12.8968	0.00167607	0.0441527	1.35504
WBGene00007150	acly-2	-0.648298	6.03592	16.793	0.00167781	0.0441527	1.35504
WBGene00016758	C49A9.4	-0.417242	4.1953	12.8939	0.00167769	0.0441527	1.35504
WBGene00022609	ZC416.2	0.769567	1.26509	12.8907	0.00167945	0.0441527	1.35504
WBGene00023187	Y67D8C.12	-1.16489	0.301322	13.0221	0.00167904	0.0441527	1.35504
WBGene00012456	Y17D7C.2	-1.0105	1.02072	12.9259	0.00169392	0.0444916	1.35172
WBGene00020415	T10E9.5	1.67762	-1.41094	12.8644	0.00169424	0.0444916	1.35172
WBGene00022725	ZK381.2	-0.730945	2.64502	13.4777	0.00170032	0.0446262	1.35041
WBGene00012810	nceh-1	1.25772	2.11651	17.4441	0.00170453	0.0447118	1.34958
WBGene00007195	thoc-7	-0.373053	5.07113	12.8417	0.00170709	0.0447538	1.34917
WBGene00000781	cpr-1	0.780113	9.02715	18.1294	0.00170979	0.04479	1.34882
WBGene00022736	ZK418.7	0.585879	2.72593	12.8359	0.00171038	0.04479	1.34882
WBGene00044188	F28F8.9	-0.545705	2.67493	12.8305	0.00171346	0.0448457	1.34828
WBGene00001702	grd-13	1.38838	6.20518	25.575	0.00172405	0.0450723	1.34609
WBGene00016614	trpp-12	-0.348425	4.87991	12.8125	0.00172372	0.0450723	1.34609
WBGene00022270	Y73E7A.3	-0.391818	4.44689	12.8056	0.00172769	0.0451424	1.34541
WBGene00219838	C28H8.14	0.470355	5.00366	13.3361	0.00173058	0.0451928	1.34493
WBGene00020245	T05B11.1	0.567649	2.79705	12.7948	0.00173393	0.045255	1.34433
WBGene00020372	T09A12.1	2.2185	-2.21017	12.7904	0.00173646	0.0452959	1.34394
WBGene00007065	pot-3	-0.603441	2.27559	12.777	0.00174426	0.0454741	1.34224
WBGene00015795	C15F1.2	-1.23612	6.64081	24.3286	0.00174863	0.0455479	1.34153
WBGene00016391	lonp-1	-0.318718	7.19044	12.7688	0.00174904	0.0455479	1.34153
WBGene00013156	Y53F4B.9	-0.370421	5.09491	12.7649	0.00175133	0.045565	1.34137
WBGene00077573	T08G5.15	2.04654	-1.71371	12.7643	0.00175164	0.045565	1.34137
WBGene00006980	zig-3	-1.65555	2.3008	20.9224	0.00175904	0.045732	1.33978
WBGene00000750	col-177	0.540679	2.56521	12.7393	0.00176633	0.0458962	1.33822
WBGene00007627	ccdc-55	-0.357329	5.04085	12.7339	0.00176954	0.0459288	1.33792
WBGene00016996	D1005.2	-0.547344	4.85706	14.3493	0.00176884	0.0459288	1.33792
WBGene00016453	vet-2	-1.3271	-0.233651	12.7262	0.00177406	0.0459951	1.33729
WBGene00017032	D1044.7	1.02774	0.908563	13.023	0.00177378	0.0459951	1.33729
WBGene00000644	col-68	0.998775	2.52417	15.8214	0.00177867	0.0460635	1.33664
WBGene00003813	nrf-6	-0.410632	5.86086	12.7197	0.00177795	0.0460635	1.33664
WBGene00012722	Y39G8B.1	-0.396931	7.35226	12.7136	0.0017816	0.0461139	1.33617
WBGene00021564	Y45G12B.3	-0.343168	5.52182	12.7068	0.00178563	0.0461928	1.33543
WBGene00020704	not found	-1.23562	4.51804	22.7385	0.00178662	0.0461929	1.33542
WBGene00014188	ZK1025.8	-0.915832	2.29264	14.5197	0.00178815	0.0462071	1.33529
WBGene00023067	rpl-41.1	-0.440436	5.8805	13.1685	0.00179596	0.0463833	1.33364
WBGene00016084	cht-3	2.5241	-2.37139	12.6869	0.00179754	0.0463984	1.3335
WBGene00021595	Y46E12BL.2	-0.363213	6.67546	12.6788	0.00180243	0.0464991	1.33256
WBGene00001040	dnj-22	-0.396143	4.0584	12.6771	0.00180343	0.0464993	1.33255
WBGene00008733	F13B12.6	0.372214	4.97031	12.6714	0.00180691	0.0465635	1.33195
WBGene00044697	poml-4	1.38195	1.74864	17.1674	0.00181118	0.0466478	1.33117
WBGene00018167	nspb-4	2.74141	1.04833	22.9567	0.00181424	0.0466497	1.33115
WBGene00021315	Y32H12A.7	-0.334174	5.19667	12.6606	0.00181342	0.0466497	1.33115
WBGene00021471	Y39G10AR.15	2.42888	-2.42544	12.6614	0.00181298	0.0466497	1.33115
WBGene00007691	cest-8	1.1543	0.968796	14.0174	0.0018192	0.0467261	1.33044
WBGene00013265	parn-2	-0.377836	4.39214	12.6526	0.00181831	0.0467261	1.33044
WBGene00010504	K02D3.1	0.856433	1.3611	12.6409	0.00182548	0.0468616	1.32918
WBGene00004778	ser-3	0.471426	3.44157	12.6381	0.00182716	0.046879	1.32902
WBGene00008964	mltn-9	-1.17865	6.50863	23.4846	0.00183655	0.0470942	1.32703
WBGene00001459	flp-16	0.355287	4.70595	12.6073	0.0018461	0.0472359	1.32573
WBGene00006674	twk-21	0.868043	1.10121	12.6079	0.00184575	0.0472359	1.32573
WBGene00020396	T10B5.10	-0.553233	4.76388	14.2541	0.00184598	0.0472359	1.32573
WBGene00021292	copb-1	-0.334243	8.24032	12.6114	0.00184356	0.0472359	1.32573
WBGene00008134	C47B2.9	-0.432392	4.53871	12.605	0.00184757	0.0472477	1.32562
WBGene00044132	C23H4.8	-0.791007	1.03948	12.5925	0.00185533	0.0474201	1.32404
WBGene00003210	mel-28	-0.343908	6.37979	12.5903	0.00185667	0.0474285	1.32396
WBGene00019759	M03F4.6	-0.356218	5.59724	12.5759	0.00186566	0.0476323	1.3221
WBGene00004098	pqn-2	3.34752	3.24119	26.5089	0.00186792	0.0476639	1.32181
WBGene00016631	C44B7.11	-0.348136	6.08338	12.5705	0.0018691	0.0476681	1.32177
WBGene00019617	ctsa-2	-0.52651	9.28063	13.965	0.00187867	0.0478861	1.31979
WBGene00010905	mrps-34	-0.33881	5.87731	12.5512	0.00188123	0.0478994	1.31967
WBGene00011579	T07D4.2	0.373507	4.81832	12.5517	0.00188094	0.0478994	1.31967
WBGene00017430	bcl-11	1.30559	7.65518	24.1649	0.00188265	0.0479095	1.31958
WBGene00043982	B0403.6	0.710684	1.72377	12.5454	0.00188489	0.0479403	1.3193
WBGene00018726	F53A9.3	1.1703	0.255229	12.6931	0.00190031	0.0483065	1.31599
WBGene00009045	F22B5.10	-0.344871	6.01231	12.51	0.00190745	0.0484353	1.31484
WBGene00010801	M01B2.8	1.24999	0.355541	13.1751	0.00190715	0.0484353	1.31484
WBGene00011083	glo-1	-0.466599	3.32215	12.5065	0.0019097	0.0484664	1.31456
WBGene00219609	linc-7	-0.599985	2.80018	12.4995	0.0019142	0.0485541	1.31377
WBGene00010303	cri-3	-0.361384	8.58904	12.4827	0.00192507	0.0488034	1.31155
WBGene00011412	mrpl-16	-0.385433	6.00046	12.4803	0.00192662	0.0488042	1.31154
WBGene00020462	ari-2	0.342037	5.26173	12.4795	0.00192718	0.0488042	1.31154
WBGene00019361	clik-3	0.459187	5.65712	13.2068	0.00192952	0.0488371	1.31125
WBGene00000962	dhc-1	-0.33003	8.37037	12.4708	0.00193279	0.0488408	1.31122
WBGene00008350	CE7X_3.2	-0.881375	0.839918	12.4709	0.00193277	0.0488408	1.31122
WBGene00044201	H39E23.3	-4.84653	0.855821	25.3673	0.00193111	0.0488408	1.31122
WBGene00206371	F28B12.6	-1.14481	-0.331994	12.4651	0.00193654	0.0489092	1.31061
WBGene00007817	C30F2.3	1.4324	3.67142	22.218	0.00194217	0.0490248	1.30958
WBGene00077762	Y57G11C.499	3.93612	-2.99497	12.4472	0.00194826	0.049152	1.30846
WBGene00002265	lec-2	0.395941	8.33913	12.4431	0.00195094	0.0491934	1.30809
WBGene00012932	Y47D3A.21	-0.329203	6.04442	12.4366	0.00195527	0.049276	1.30736
WBGene00004950	sox-3	0.531322	2.60054	12.4106	0.0019725	0.0496835	1.30379
WBGene00004874	smc-4	-0.315538	6.39213	12.4024	0.00197794	0.0497936	1.30283
WBGene00007626	rnf-121	-0.326716	5.51088	12.3997	0.00197976	0.0498003	1.30277
WBGene00302995	H06H21.37	0.713077	1.11676	12.3988	0.00198033	0.0498003	1.30277
WBGene00002256	lbp-4	-0.325529	5.377	12.3952	0.00198273	0.0498126	1.30266
WBGene00005988	srx-97	3.22324	-2.86719	12.3949	0.00198294	0.0498126	1.30266
WBGene00002804	let-630	-0.311475	6.94837	12.3908	0.00198573	0.049856	1.30228
WBGene00009944	mtcu-2	-0.344441	5.46035	12.3761	0.00199557	0.0500761	1.30037
WBGene00016325	C32E8.9	-0.394081	4.48341	12.3719	0.00199843	0.0501211	1.29998
WBGene00003652	nhr-62	-0.557635	2.92243	12.3686	0.00200064	0.0501372	1.29984
WBGene00255598	BE0003N10.6	1.3164	-1.01481	12.3678	0.00200121	0.0501372	1.29984
WBGene00017085	E01A2.2	-0.311519	7.26675	12.3662	0.00200232	0.0501382	1.29983
WBGene00009318	F32B4.8	-0.834861	3.01624	14.7662	0.00201221	0.0503591	1.29792
WBGene00010850	M04C3.1	0.369722	5.55239	12.3484	0.00201441	0.0503871	1.29768
WBGene00011369	T02C12.4	-0.996012	-0.0308349	12.342	0.00201874	0.0504685	1.29698
WBGene00012244	mrps-11	-0.37143	5.62444	12.325	0.00203038	0.0507325	1.29471
WBGene00000075	adm-4	-0.421158	4.23625	12.3198	0.00203398	0.0507952	1.29418
WBGene00018616	F48G7.5	2.19033	4.56415	25.5555	0.00203724	0.0508495	1.29371
WBGene00007143	B0334.3	0.369615	7.82769	12.3011	0.00204688	0.0510632	1.29189
WBGene00021295	Y25C1A.8	-0.373723	4.69632	12.294	0.00205185	0.0511325	1.2913
WBGene00022670	ZK177.2	-0.92888	0.320145	12.2945	0.00205148	0.0511325	1.2913
WBGene00004801	sir-2.2	-0.333048	5.17443	12.2845	0.00205849	0.0512708	1.29013
WBGene00021298	Y27F2A.6	-2.18936	-2.07272	12.2747	0.00206531	0.0514134	1.28892
WBGene00219567	linc-164	3.55837	-2.83429	12.2687	0.00206953	0.0514912	1.28827
WBGene00015434	C04E12.4	0.712096	4.81357	16.2625	0.00207186	0.0515217	1.28801
WBGene00003234	mif-1	0.465951	4.29853	12.2598	0.00207575	0.0515912	1.28742
WBGene00219449	Y38A10A.11	-1.34342	-0.864829	12.2477	0.00208434	0.0517772	1.28586
WBGene00011831	T19B10.2	-0.51323	9.09739	13.5287	0.00208771	0.0518334	1.28539
WBGene00001975	hmg-5	-0.366645	4.32531	12.2385	0.00209085	0.0518837	1.28497
WBGene00003464	msp-77	3.62192	-2.47646	13.0687	0.00209711	0.0520115	1.2839
WBGene00003172	mec-8	0.340469	5.9854	12.2258	0.00209987	0.0520525	1.28356
WBGene00021351	eif-2alpha	-0.343798	8.18818	12.2034	0.00211597	0.0524239	1.28047
WBGene00004771	sem-2	0.555891	6.04363	14.6182	0.00212048	0.0524249	1.28046
WBGene00013661	Y105C5B.23	-1.60185	-1.17273	12.1983	0.0021196	0.0524249	1.28046
WBGene00018189	nhr-181	2.30863	0.821844	19.7085	0.0021186	0.0524249	1.28046
WBGene00022677	rfth-1	-0.410539	3.75121	12.1992	0.00211896	0.0524249	1.28046
WBGene00009620	fip-5	0.48628	4.43548	12.5849	0.00212357	0.0524736	1.28006
WBGene00010094	tsfm-1	-0.335711	6.47687	12.1892	0.00212622	0.0524838	1.27997
WBGene00019972	R09A1.2	-0.774414	1.52632	12.1892	0.0021262	0.0524838	1.27997
WBGene00007226	C01G6.4	0.422419	4.15655	12.1841	0.00212986	0.052546	1.27946
WBGene00001155	ech-6	-0.544776	9.7276	13.8232	0.00213508	0.0526192	1.27886
WBGene00010771	K11D2.5	-0.428326	4.45733	12.1781	0.00213426	0.0526192	1.27886
WBGene00022090	Y69A2AR.19	2.577	-1.83916	12.7518	0.00213656	0.052628	1.27878
WBGene00014245	ZK1307.2	1.77313	1.9848	19.8889	0.00214682	0.052853	1.27693
WBGene00001765	gst-17	-1.83907	-1.12586	12.5319	0.00216012	0.0530688	1.27516
WBGene00004121	ptrn-1	-0.345204	6.45165	12.1412	0.00216124	0.0530688	1.27516
WBGene00006552	tbx-33	6.46361	-3.55662	12.4821	0.00216103	0.0530688	1.27516
WBGene00018339	abcf-3	-0.329961	7.71167	12.1424	0.00216037	0.0530688	1.27516
WBGene00235133	T26H5.14	1.47049	-1.08974	12.1438	0.00215931	0.0530688	1.27516
WBGene00022504	mam-1	-0.727812	4.8307	16.3508	0.0021678	0.0532019	1.27407
WBGene00017437	nmgp-1	-0.469833	3.43758	12.124	0.00217394	0.0533247	1.27307
WBGene00001027	dnj-9	-0.31151	6.19451	12.111	0.00218359	0.0535334	1.27137
WBGene00011775	copg-1	-0.326574	8.22055	12.1039	0.00218893	0.0536362	1.27054
WBGene00020870	T28A11.3	-2.88201	-2.61136	12.0908	0.00219873	0.0538483	1.26883
WBGene00008143	C47E8.4	-0.458118	4.53774	12.2171	0.00220165	0.0538868	1.26852
WBGene00020852	nhr-228	0.414502	3.93919	12.0841	0.00220375	0.0538868	1.26852
WBGene00022572	ZC239.14	1.12275	-0.332146	12.0852	0.0022029	0.0538868	1.26852
WBGene00016323	pmlr-1	-0.398733	4.60045	12.0619	0.00222049	0.0542534	1.26557
WBGene00021976	Y58A7A.2	-1.09497	1.93123	14.7116	0.00222106	0.0542534	1.26557
WBGene00011688	T10C6.6	-0.333096	5.77366	12.0557	0.00222525	0.0543274	1.26498
WBGene00009638	nspc-14	-0.596628	5.61056	14.886	0.00222864	0.0543535	1.26477
WBGene00043995	F40F12.9	1.01328	0.350706	12.0525	0.00222765	0.0543535	1.26477
WBGene00014125	ZK863.8	1.33118	4.58035	22.3289	0.00223257	0.054421	1.26423
WBGene00012595	Y38E10A.17	0.893053	0.884942	12.0354	0.00224074	0.0545918	1.26287
WBGene00007927	C34C12.8	-0.343833	6.53253	12.0314	0.00224382	0.0546102	1.26273
WBGene00011510	pdha-1	-0.340639	8.78763	12.0318	0.00224347	0.0546102	1.26273
WBGene00005024	sqv-6	-0.405511	4.66477	12.0163	0.00225541	0.0548353	1.26094
WBGene00010793	LLC1.2	-0.348697	6.64196	12.0172	0.00225474	0.0548353	1.26094
WBGene00009230	oac-18	-1.86995	-1.23695	12.0197	0.00225746	0.0548547	1.26079
WBGene00017307	F09F9.2	-0.784063	6.32208	17.7686	0.00225855	0.0548547	1.26079
WBGene00020016	lipl-3	1.73528	-1.18964	12.0091	0.00226097	0.054885	1.26055
WBGene00012256	lpr-5	-1.02694	8.71816	20.1582	0.00226222	0.0548869	1.26053
WBGene00017707	F22E5.8	0.800509	0.632912	12.0044	0.00226465	0.0549175	1.26029
WBGene00018038	F35C8.8	-2.42816	-1.88298	12.13	0.0022717	0.05506	1.25916
WBGene00000111	alh-5	-0.407421	4.64318	11.9851	0.00227966	0.0551585	1.25839
WBGene00000151	apn-1	-0.35084	4.64062	11.9874	0.00227781	0.0551585	1.25839
WBGene00007841	C31C9.7	0.482286	4.13003	12.0415	0.00228049	0.0551585	1.25839
WBGene00014562	Y17D7B.7	-0.492779	3.72658	11.981	0.00228283	0.0551585	1.25839
WBGene00018787	cutl-20	0.686188	3.74647	14.0251	0.00228208	0.0551585	1.25839
WBGene00050884	Y69H2.15	0.475115	3.01575	11.981	0.00228282	0.0551585	1.25839
WBGene00021531	Y42G9A.1	0.526386	2.60436	11.9746	0.00228789	0.0552524	1.25765
WBGene00020356	T08B6.9	3.87315	-3.00281	11.9725	0.00228952	0.0552632	1.25756
WBGene00021367	Y37E11AM.3	-0.383211	4.45898	11.9682	0.00229288	0.0553158	1.25715
WBGene00020018	R12B2.2	-0.439569	3.16757	11.9593	0.0022999	0.0554566	1.25605
WBGene00017071	aagr-1	0.402351	5.67808	11.9497	0.00230748	0.0556093	1.25485
WBGene00020915	nol-58	-0.368101	9.28602	11.9483	0.0023086	0.0556093	1.25485
WBGene00220025	K11E8.7	1.057	-0.00893878	11.9455	0.00231085	0.0556349	1.25465
WBGene00010421	slc-36.4	0.484715	2.9969	11.941	0.00231442	0.0556635	1.25443
WBGene00018214	F39H12.3	0.369802	5.11062	11.9417	0.00231387	0.0556635	1.25443
WBGene00003733	nhx-5	0.352062	5.39364	11.9358	0.00231849	0.0557329	1.25389
WBGene00021697	gcn-1	-0.362459	7.72611	11.9203	0.00233085	0.0560014	1.2518
WBGene00021732	Y49G5B.1	0.385618	4.93862	11.9167	0.00233378	0.0560431	1.25148
WBGene00019877	R05D3.2	0.415788	4.9909	11.9038	0.00234417	0.0562637	1.24977
WBGene00012272	dhc-4	0.7483	2.42617	12.5761	0.00234821	0.0563319	1.24925
WBGene00022673	ZK177.8	0.434751	4.83946	12.0238	0.00234949	0.0563337	1.24923
WBGene00007544	fipr-6	1.66214	2.84695	20.8327	0.0023531	0.0563739	1.24892
WBGene00013203	Y54E5A.8	0.469811	3.39402	11.8921	0.00235357	0.0563739	1.24892
WBGene00012230	cacn-1	-0.320246	5.83947	11.8891	0.00235602	0.0564036	1.24869
WBGene00006636	tsp-10	0.575255	4.22429	13.2186	0.00236569	0.0566062	1.24714
WBGene00017038	dmsr-4	0.646172	1.49862	11.8667	0.00237424	0.0567819	1.24579
WBGene00020725	cnp-3	-0.719466	3.71323	14.2592	0.00237669	0.0568114	1.24556
WBGene00007628	C16C10.8	-0.361358	5.21647	11.8596	0.00238004	0.0568335	1.2454
WBGene00021536	Y42H9AR.1	-0.330492	6.88996	11.8605	0.00237928	0.0568335	1.2454
WBGene00006473	tag-124	-0.352973	4.41845	11.8524	0.00238596	0.056946	1.24454
WBGene00011870	T20G5.8	0.435857	4.47257	11.845	0.00239201	0.0570612	1.24366
WBGene00022126	Y71F9B.2	-0.352587	4.57979	11.8419	0.00239455	0.0570928	1.24342
WBGene00014036	ZK643.5	-0.388841	5.75246	11.8374	0.00239832	0.0571537	1.24296
WBGene00000693	col-119	1.87742	0.772505	17.0253	0.00239986	0.0571614	1.2429
WBGene00011286	ttr-29	0.645528	1.86161	11.8319	0.00240283	0.0571629	1.24289
WBGene00016751	C48E7.6	0.422057	4.6681	11.831	0.00240359	0.0571629	1.24289
WBGene00018014	wdr-83	-0.502708	2.97105	11.8324	0.00240241	0.0571629	1.24289
WBGene00015464	C05C8.7	-0.499693	8.63616	13.0473	0.00240585	0.0571876	1.2427
WBGene00220084	T23B12.14	1.98254	-1.53809	11.8984	0.00240929	0.0572405	1.2423
WBGene00001661	gop-2	-0.335733	5.18085	11.8193	0.00241328	0.0573063	1.2418
WBGene00008735	F13D2.1	-0.342808	5.71186	11.8154	0.00241651	0.0573539	1.24144
WBGene00009125	F25H5.2	-2.42592	-0.164117	16.6028	0.00243062	0.0576597	1.23913
WBGene00044207	Y6G8.5	1.99321	-1.74917	11.7912	0.00243677	0.0577471	1.23847
WBGene00045177	T21D12.14	1.23018	3.28467	18.4931	0.00243587	0.0577471	1.23847
WBGene00010616	K07A1.10	-0.325515	5.8197	11.7853	0.00244176	0.0578069	1.23802
WBGene00019411	K05F1.10	-0.396688	4.04511	11.7863	0.00244089	0.0578069	1.23802
WBGene00022700	ZK353.4	-2.21302	-2.01206	11.7836	0.0024432	0.0578118	1.23798
WBGene00009380	F34H10.3	0.373145	4.78411	11.7771	0.0024487	0.0579127	1.23723
WBGene00000596	col-7	2.3772	-2.3087	11.7716	0.00245337	0.0579177	1.23719
WBGene00003661	nhr-71	0.344204	4.80213	11.7735	0.00245173	0.0579177	1.23719
WBGene00007248	catp-4	2.08681	-2.08254	11.7713	0.00245356	0.0579177	1.23719
WBGene00015568	sre-3	1.22998	-0.570685	11.771	0.00245386	0.0579177	1.23719
WBGene00016052	dod-3	1.55606	1.35182	16.4897	0.00245951	0.0580219	1.23641
WBGene00012887	Y45F10D.7	-0.357499	6.41522	11.7611	0.00246228	0.058058	1.23614
WBGene00015809	C16A3.4	-0.343616	6.76115	11.7583	0.00246463	0.0580842	1.23594
WBGene00013837	fbxa-30	2.14671	-1.69685	11.7563	0.00246635	0.0580955	1.23586
WBGene00008164	C47G2.3	-0.377601	5.27977	11.7544	0.00246792	0.0581033	1.2358
WBGene00018219	F40A3.4	0.610771	1.64299	11.7523	0.00246972	0.0581166	1.2357
WBGene00012030	T25G3.3	-0.318204	6.87553	11.749	0.00247261	0.0581261	1.23563
WBGene00018645	F49F1.5	1.11029	3.23157	17.2271	0.00247243	0.0581261	1.23563
WBGene00011097	nhr-206	0.755676	1.02486	11.7462	0.00247499	0.0581314	1.23559
WBGene00011098	nhr-207	1.52453	-1.43566	11.7458	0.00247531	0.0581314	1.23559
WBGene00006937	wah-1	-0.326068	7.51426	11.7354	0.00248423	0.0583117	1.23424
WBGene00008380	prp-38	-0.377291	5.02979	11.7252	0.00249297	0.0584875	1.23294
WBGene00020952	kel-8	-0.429589	5.77027	12.2013	0.00250093	0.0586447	1.23177
[truncated: 44,876 more rows]

## Sheet: SMA9 vs N2
GeneID	Public Name	logFC	logCPM	F	PValue	FDR	-LOG(FDR)
WBGene00005832	srw-85	-4.4766	4.31489	1179.39	3.1e-20	1.45e-15	14.8386
WBGene00001816	haf-6	-2.95707	5.28744	850.579	9.6e-19	2.25e-14	13.6478
WBGene00235319	F44E7.17	-8.2335	1.84076	449.62	7.15e-16	1.12e-11	10.9508
WBGene00000914	daf-19	1.95005	5.98612	344.644	1.07e-14	1.26e-10	9.89963
WBGene00014954	Y102A5C.5	-7.17614	1.48547	336.629	1.36e-14	1.28e-10	9.89279
WBGene00006608	tre-2	1.60914	5.89072	277.027	9.65e-14	6.48e-10	9.18842
WBGene00010407	scb-1	2.00969	4.34053	276.947	9.68e-14	6.48e-10	9.18842
WBGene00013484	Y69H2.9	2.19198	3.62065	264.43	1.53e-13	8.99e-10	9.04624
WBGene00003093	lys-4	-1.87257	7.74876	253.079	2.37e-13	1.11e-09	8.95468
WBGene00021500	Y40C7B.4	5.12314	1.00891	255.899	2.13e-13	1.11e-09	8.95468
WBGene00007756	C27A7.5	1.73995	5.65625	234.672	5.01e-13	2.13e-09	8.67162
WBGene00014138	clec-186	-1.9497	4.89419	233.946	5.85e-13	2.29e-09	8.64016
WBGene00020474	lips-13	6.40949	2.121	390.887	8.3e-13	2.99e-09	8.52433
WBGene00015180	B0416.4	6.58846	1.65501	334.32	9.95e-13	3.33e-09	8.47756
WBGene00018353	fbxa-182	2.46936	2.28988	204.562	1.93e-12	6.02e-09	8.2204
WBGene00013306	Y57G11C.8	3.61669	1.43979	201.544	2.23e-12	6.52e-09	8.18575
WBGene00001758	gst-10	-1.57695	6.07771	196.898	2.79e-12	7.32e-09	8.13549
WBGene00011487	T05E12.6	-1.49746	7.65682	196.756	2.81e-12	7.32e-09	8.13549
WBGene00044213	Y102A5C.36	-9.96741	0.1767	225.171	3.78e-12	9.32e-09	8.03058
WBGene00002997	lin-8	1.6139	4.10162	184.808	5.16e-12	1.15e-08	7.9393
WBGene00004062	pmp-5	-1.41851	8.55096	185.437	4.99e-12	1.15e-08	7.9393
WBGene00012535	Y37A1A.2	1.99893	2.82055	171.808	1.04e-11	2.22e-08	7.65365
WBGene00008546	gfat-1	1.43733	7.30549	153.533	3.04e-11	6.12e-08	7.21325
WBGene00010157	oac-34	2.39886	3.02948	168.813	3.13e-11	6.12e-08	7.21325
WBGene00006510	mtrr-1	-1.2178	7.86597	151.822	3.37e-11	6.33e-08	7.1986
WBGene00194649	Y57G11C.1130	3.41796	0.351403	149.006	4.03e-11	7.26e-08	7.13906
WBGene00003055	lon-1	1.31798	7.51719	141.016	6.76e-11	1.17e-07	6.93181
WBGene00008429	etc-1	-1.24755	5.47232	139.429	7.52e-11	1.26e-07	6.89963
WBGene00015423	C04E6.7	1.57642	3.86611	137.396	8.62e-11	1.39e-07	6.85699
WBGene00304798	F31B9.8	4.31166	0.294401	134.157	1.08e-10	1.68e-07	6.77469
WBGene00019738	clec-265	-1.28999	5.70893	125.818	1.95e-10	2.95e-07	6.53018
WBGene00010124	F55G11.4	-1.92795	4.4899	169.515	2.13e-10	3.12e-07	6.50585
WBGene00010681	mak-1	1.09617	7.98065	121.914	2.61e-10	3.71e-07	6.43063
WBGene00185077	F58D2.4	7.16637	-0.731729	120.402	2.93e-10	4.03e-07	6.39469
WBGene00015605	C08E3.13	2.98262	3.30694	212.81	3.09e-10	4.14e-07	6.383
WBGene00000975	dhs-12	1.16249	5.73173	117.397	3.69e-10	4.8e-07	6.31876
WBGene00018811	pmt-2	-1.15995	9.58955	116.542	3.94e-10	4.99e-07	6.3019
WBGene00016274	C30G12.2	-1.08777	5.32842	111.589	5.85e-10	7.22e-07	6.14146
WBGene00011803	T16G12.1	-1.07504	7.25439	110.146	6.58e-10	7.91e-07	6.10182
WBGene00021772	math-45	3.14914	0.852501	109.538	6.92e-10	8.11e-07	6.09098
WBGene00015642	C09E7.8	1.20402	4.27071	104.628	1.05e-09	1.17e-06	5.93181
WBGene00020989	W03D8.8	-1.4354	3.29386	104.64	1.04e-09	1.17e-06	5.93181
WBGene00005444	srh-237	-1.63522	2.76311	102.696	1.24e-09	1.35e-06	5.86967
WBGene00044163	F49C5.11	-1.23654	4.30856	99.9274	1.58e-09	1.68e-06	5.77469
WBGene00007368	C06B8.2	1.51192	3.45568	99.2823	1.67e-09	1.74e-06	5.75945
WBGene00009902	drd-1	-0.952207	5.35772	98.2229	1.84e-09	1.8e-06	5.74473
WBGene00011829	T19A6.4	1.41959	3.60584	98.199	1.84e-09	1.8e-06	5.74473
WBGene00020516	T15B7.1	-0.983344	5.53079	98.3796	1.81e-09	1.8e-06	5.74473
WBGene00000171	aqp-3	4.85133	0.248966	122.894	2.23e-09	2.1e-06	5.67778
WBGene00009061	pals-14	2.94624	0.250405	96.1794	2.22e-09	2.1e-06	5.67778
WBGene00021404	trpl-3	4.28042	-0.533308	94.3818	2.62e-09	2.41e-06	5.61798
WBGene00018885	drd-5	-1.08793	4.45517	93.7624	2.77e-09	2.5e-06	5.60206
WBGene00015050	clec-51	-1.27883	5.05299	100.898	2.94e-09	2.59e-06	5.5867
WBGene00022562	ZC204.12	-1.07377	4.65994	92.9896	2.98e-09	2.59e-06	5.5867
WBGene00010657	K08D8.3	-0.945499	5.32098	87.928	4.87e-09	4.15e-06	5.38195
WBGene00020239	T05B4.8	3.85172	0.057948	87.2135	5.23e-09	4.38e-06	5.35853
WBGene00000669	col-94	-3.96705	-0.0450653	89.7517	6.49e-09	5.34e-06	5.27246
WBGene00008677	F11A5.9	1.2902	3.39327	84.5329	6.85e-09	5.54e-06	5.25649
WBGene00001157	ech-8	-1.13004	4.37898	84.1295	7.14e-09	5.59e-06	5.25259
WBGene00020240	T05B4.9	5.71769	-0.0621227	110.386	7.15e-09	5.59e-06	5.25259
WBGene00007866	C32H11.3	2.65896	0.511693	83.6727	7.48e-09	5.75e-06	5.24033
WBGene00043062	clec-80	1.08326	5.07458	83.2651	7.81e-09	5.9e-06	5.22915
WBGene00012217	W02H3.1	2.61745	1.19138	88.3055	8.11e-09	6.03e-06	5.21968
WBGene00017881	asp-13	-0.907305	8.35183	80.9718	9.92e-09	7.27e-06	5.13847
WBGene00008127	ddo-1	-1.62061	2.54244	78.6946	1.27e-08	9.13e-06	5.03953
WBGene00012634	Y38H6C.23	-2.87029	0.311497	78.2205	1.33e-08	9.42e-06	5.02595
WBGene00021408	trpl-4	5.26248	-0.93699	78.1334	1.35e-08	9.42e-06	5.02595
WBGene00022083	Y69A2AR.12	4.64227	0.2713	108.986	1.41e-08	9.73e-06	5.01189
WBGene00006695	twk-45	2.59438	-0.171457	77.2316	1.49e-08	9.95e-06	5.00218
WBGene00018516	gakh-1	-0.910259	4.80306	77.2816	1.48e-08	9.95e-06	5.00218
WBGene00021873	clec-82	2.54113	1.5749	90.2495	1.51e-08	1e-05	5
WBGene00001399	fat-7	-4.87819	5.32236	405.377	1.95e-08	1.27e-05	4.8962
WBGene00008681	scrm-4	-1.72666	3.25861	91.2708	2.04e-08	1.31e-05	4.88273
WBGene00018174	F38B6.4	-0.990107	5.92628	73.2719	2.32e-08	1.47e-05	4.83268
WBGene00017212	F07E5.7	2.18051	2.59268	98.3577	2.57e-08	1.61e-05	4.79317
WBGene00010421	slc-36.4	1.19245	2.9969	71.9768	2.69e-08	1.66e-05	4.77989
WBGene00019931	R07C12.1	2.45169	0.720807	71.6863	2.78e-08	1.69e-05	4.77211
WBGene00219216	K08D10.14	1.29951	2.58822	71.1562	2.96e-08	1.78e-05	4.74958
WBGene00007808	best-7	-1.44757	2.94973	70.852	3.07e-08	1.81e-05	4.74232
WBGene00008567	acox-1.4	-0.966315	5.85154	70.8069	3.08e-08	1.81e-05	4.74232
WBGene00022645	ZK6.11	-0.991088	8.05746	70.154	3.33e-08	1.93e-05	4.71444
WBGene00008484	E04D5.5	-1.34901	2.55188	69.0695	3.79e-08	2.17e-05	4.66354
WBGene00017103	klo-2	1.32212	2.65076	68.4474	4.09e-08	2.31e-05	4.63639
WBGene00009430	F35E12.6	-0.765283	6.01088	68.1213	4.25e-08	2.37e-05	4.62525
WBGene00014955	Y102A5C.6	-5.60056	2.21072	196.133	4.36e-08	2.41e-05	4.61798
WBGene00013594	Y87G2A.2	-1.10598	5.0869	74.6465	4.67e-08	2.55e-05	4.59346
WBGene00001446	flp-3	0.849239	4.48904	66.3762	5.26e-08	2.84e-05	4.54668
WBGene00009857	clec-28	1.63982	1.51262	66.1034	5.45e-08	2.88e-05	4.54061
WBGene00015116	paic-1	-0.798814	6.37586	66.0687	5.47e-08	2.88e-05	4.54061
WBGene00010472	cdr-7	1.01728	3.63497	65.8576	5.61e-08	2.92e-05	4.53462
WBGene00021678	Y48G1C.5	3.76002	-1.1014	65.7652	5.68e-08	2.93e-05	4.53313
WBGene00004862	sma-9	1.0321	7.13632	72.3297	5.79e-08	2.95e-05	4.53018
WBGene00005643	srp-2	1.54105	2.16555	65.1678	6.12e-08	3.08e-05	4.51145
WBGene00003959	pcp-4	-0.883111	5.33379	64.9919	6.26e-08	3.12e-05	4.50585
WBGene00008565	acox-1.2	-1.75672	8.63617	122.451	6.86e-08	3.39e-05	4.4698
WBGene00018647	F49F1.7	1.95371	1.51744	63.6579	7.41e-08	3.62e-05	4.44129
WBGene00007218	C01A2.6	5.03723	0.0138811	94.9352	7.86e-08	3.8e-05	4.42022
WBGene00007072	ugt-1	-0.949057	4.64416	61.6693	9.58e-08	4.56e-05	4.34104
WBGene00021339	Y34F4.4	2.24981	0.699578	61.6347	9.62e-08	4.56e-05	4.34104
WBGene00004020	pho-1	-0.734694	7.16214	61.3022	1.01e-07	4.71e-05	4.32698
WBGene00020080	math-37	2.05001	0.486884	60.2618	1.15e-07	5.35e-05	4.27165
WBGene00018406	F44A2.7	4.20889	-0.152986	76.5469	1.33e-07	6.13e-05	4.21254
WBGene00012908	Y46G5A.18	-0.765042	5.4803	57.9788	1.57e-07	7.08e-05	4.14997
WBGene00019022	F58A6.1	-1.02453	5.31542	65.018	1.56e-07	7.08e-05	4.14997
WBGene00009908	F49H6.5	3.50151	-0.710672	57.7249	1.63e-07	7.26e-05	4.13906
WBGene00009533	F38B7.2	1.03207	3.52847	57.2489	1.74e-07	7.68e-05	4.11464
WBGene00014030	glb-1	1.25976	2.84678	57.1332	1.76e-07	7.73e-05	4.11182
WBGene00020473	lips-12	7.60902	1.08593	152.493	1.8e-07	7.82e-05	4.10679
WBGene00003704	nhr-114	-0.969987	7.64544	62.211	1.84e-07	7.91e-05	4.10182
WBGene00009973	F53C11.3	-0.757416	6.5433	56.3321	1.97e-07	8.33e-05	4.07935
WBGene00010833	M03B6.1	-1.20823	2.87576	56.3448	1.97e-07	8.33e-05	4.07935
WBGene00015200	lido-13	1.08754	3.29067	55.9879	2.07e-07	8.67e-05	4.06198
WBGene00044004	C24A8.6	-1.49194	1.39677	55.8587	2.11e-07	8.75e-05	4.05799
WBGene00022365	Y92H12BL.4	1.0987	4.01314	57.5552	2.25e-07	9.25e-05	4.03386
WBGene00019731	M02D8.5	1.56257	1.34693	55.292	2.28e-07	9.31e-05	4.03105
WBGene00000218	asp-5	-0.807866	9.95138	54.8969	2.42e-07	9.54e-05	4.02045
WBGene00010745	dod-17	-1.09071	4.12777	58.0602	2.42e-07	9.54e-05	4.02045
WBGene00016877	C52D10.3	-0.839317	6.30237	54.9596	2.4e-07	9.54e-05	4.02045
WBGene00018295	oac-29	-0.856351	4.74148	54.9698	2.39e-07	9.54e-05	4.02045
WBGene00009859	clec-33	1.9048	0.983098	54.6593	2.5e-07	9.69e-05	4.01368
WBGene00014046	clec-60	4.05375	3.19583	178.732	2.5e-07	9.69e-05	4.01368
WBGene00015965	ugt-48	-0.65255	5.89749	54.3882	2.6e-07	9.99e-05	4.00043
WBGene00018921	sago-2	0.874862	3.81869	54.219	2.66e-07	0.00010151	3.99349
WBGene00020256	T05C3.6	-0.817033	4.73041	53.5118	2.95e-07	0.000111541	3.95257
WBGene00012631	vmo-1	-2.63322	-0.629601	53.2731	3.06e-07	0.000114564	3.94095
WBGene00022641	ZK6.6	0.995695	3.60834	52.738	3.3e-07	0.000122918	3.91038
WBGene00020329	bath-26	-1.7345	1.28751	52.529	3.41e-07	0.00012576	3.90046
WBGene00006461	tag-96	0.964075	3.93194	51.4692	3.99e-07	0.000144693	3.83955
WBGene00008654	pfas-1	-0.713367	6.52694	51.4276	4.01e-07	0.000144693	3.83955
WBGene00021928	Y55F3AM.11	1.00297	3.1094	51.4443	4e-07	0.000144693	3.83955
WBGene00010545	cbp-2	1.76223	3.68554	83.375	4.16e-07	0.000148889	3.82714
WBGene00002258	lbp-6	-0.755202	8.53013	50.8306	4.39e-07	0.00015588	3.80721
WBGene00020962	W02H5.8	-0.797993	3.99387	49.9304	5.03e-07	0.000177377	3.7511
WBGene00009394	clec-63	-0.965426	9.81523	54.7563	5.1e-07	0.000178579	3.74817
WBGene00001506	fut-2	1.06456	2.63917	49.5539	5.33e-07	0.00018243	3.7389
WBGene00002260	lbp-8	-2.10265	0.575819	49.5669	5.32e-07	0.00018243	3.7389
WBGene00004354	rgs-11	4.11891	-0.0344684	71.5403	5.31e-07	0.00018243	3.7389
WBGene00022766	cblc-1	-0.716785	5.95673	49.1594	5.67e-07	0.000192466	3.71565
WBGene00003574	ncx-9	2.03698	-0.0100419	49.0949	5.72e-07	0.000192995	3.71445
WBGene00009840	fbxa-189	1.62864	1.3937	48.9874	5.82e-07	0.000194833	3.71034
WBGene00015593	C08E3.1	2.98923	0.156904	58.5017	6.25e-07	0.00020776	3.68244
WBGene00011511	gpcp-2	0.656786	6.86682	48.0931	6.69e-07	0.000214797	3.66797
WBGene00011849	T19H5.4	0.792043	4.54241	48.1546	6.63e-07	0.000214797	3.66797
WBGene00013007	Y48E1B.8	-0.714513	7.58408	48.1088	6.67e-07	0.000214797	3.66797
WBGene00019521	dmd-7	1.66443	7.30592	101.159	6.58e-07	0.000214797	3.66797
WBGene00077585	T01G5.8	4.11595	-0.484164	61.5663	6.65e-07	0.000214797	3.66797
WBGene00020128	R193.2	-0.81808	7.00955	48.9444	6.86e-07	0.0002187	3.66015
WBGene00012633	Y38H6C.21	-4.19547	-1.16168	49.0138	7.31e-07	0.00023159	3.63528
WBGene00016431	C35A11.4	-0.954728	4.77631	52.277	7.98e-07	0.000251199	3.59998
WBGene00184956	F49C5.12	-1.94103	0.562163	46.9127	8.07e-07	0.000252056	3.5985
WBGene00000512	ckb-2	1.06559	4.2538	53.1023	8.48e-07	0.000263296	3.57956
WBGene00017849	F27B3.7	0.948317	2.92535	46.3786	8.79e-07	0.000270999	3.56703
WBGene00012592	Y38E10A.14	0.767179	5.86995	46.208	9.03e-07	0.000275974	3.55913
WBGene00012593	nspe-7	1.58957	1.06865	46.1848	9.07e-07	0.000275974	3.55913
WBGene00000111	alh-5	-0.803148	4.64318	46.0636	9.25e-07	0.000279623	3.55343
WBGene00015074	natc-2	0.65595	6.51739	45.8986	9.5e-07	0.000285361	3.54461
WBGene00008988	F20G2.5	1.69056	1.93478	51.2337	9.77e-07	0.000289723	3.53802
WBGene00019653	cest-31	-0.895662	3.55777	45.7643	9.71e-07	0.000289723	3.53802
WBGene00009397	clec-66	-2.57447	4.41827	131.317	9.96e-07	0.000293765	3.532
WBGene00016064	acd-1	-2.24513	1.2061	55.3533	1.1e-06	0.000321673	3.49259
WBGene00011990	T24D5.2	0.961819	4.45394	48.7868	1.12e-06	0.000324657	3.48858
WBGene00018393	msra-1	-1.19119	8.0764	66.3689	1.12e-06	0.000324657	3.48858
WBGene00020909	W01A11.1	-0.660937	6.3116	44.8224	1.13e-06	0.000325695	3.48719
WBGene00017340	F10D7.3	0.763018	5.95584	44.4805	1.2e-06	0.000342545	3.46528
WBGene00013690	hprt-1	-0.66999	6.4983	44.4113	1.21e-06	0.000344399	3.46294
WBGene00017519	hpo-25	-2.96377	-1.12553	44.2103	1.25e-06	0.000353962	3.45104
WBGene00017703	F22E5.1	-1.09865	3.72715	48.6403	1.27e-06	0.00035721	3.44708
WBGene00001398	fat-6	-0.727473	8.69902	43.454	1.42e-06	0.000394651	3.40379
WBGene00008925	F17H10.1	-0.644567	6.00102	43.4759	1.42e-06	0.000394651	3.40379
WBGene00020765	T24C12.3	-0.742297	4.75981	43.2581	1.47e-06	0.000405525	3.39198
WBGene00020472	lips-11	8.75826	7.75319	297.714	1.54e-06	0.000420828	3.3759
WBGene00002090	ins-7	2.18964	-0.297855	42.9379	1.55e-06	0.000423166	3.37349
WBGene00011339	T01G5.1	-0.815211	4.68395	42.5948	1.65e-06	0.00044606	3.35061
WBGene00008936	papl-1	-0.603978	6.19013	42.5034	1.67e-06	0.000448367	3.34837
WBGene00011128	adk-1	-0.671158	9.40685	42.4641	1.68e-06	0.000448367	3.34837
WBGene00018384	F43C11.7	1.94064	1.74032	53.2564	1.68e-06	0.000448367	3.34837
WBGene00002118	ins-35	-1.09655	3.88467	48.3279	1.84e-06	0.00048762	3.31192
WBGene00012699	Y39B6A.41	-1.61	1.11624	41.7817	1.89e-06	0.000498612	3.30224
WBGene00020688	cest-6	-1.00069	2.53664	41.7177	1.91e-06	0.000501353	3.29986
WBGene00001819	haf-9	-0.603237	8.34088	41.5664	1.97e-06	0.000511834	3.29087
WBGene00004246	puf-10	1.13261	2.82305	40.9963	2.17e-06	0.000562276	3.25005
WBGene00004352	rgs-9	8.17701	-2.23283	43.8199	2.2e-06	0.000565947	3.24722
WBGene00013875	cest-2.1	-1.14557	3.41861	45.2284	2.27e-06	0.000580694	3.23605
WBGene00012917	Y46G5A.29	0.700381	6.68018	40.5099	2.37e-06	0.000602571	3.21999
WBGene00009839	fbxa-188	1.70996	0.951804	40.4772	2.38e-06	0.000602797	3.21983
WBGene00008560	pho-13	-0.733945	5.21442	40.2213	2.49e-06	0.000624029	3.2048
WBGene00015650	pkg-2	0.94361	6.95213	50.9167	2.49e-06	0.000624029	3.2048
WBGene00020169	mmaa-1	-0.702791	6.87802	40.1571	2.52e-06	0.000627833	3.20216
WBGene00004857	sma-3	0.675472	4.62904	40.0829	2.55e-06	0.000632816	3.19872
WBGene00016577	clec-3	-3.12828	0.395597	57.6038	2.58e-06	0.0006336	3.19818
WBGene00021518	hpo-6	0.665652	5.34612	40.0169	2.58e-06	0.0006336	3.19818
WBGene00012910	Y46G5A.20	1.54138	1.79234	41.7781	2.64e-06	0.000639552	3.19412
WBGene00020952	kel-8	-0.821356	5.77027	44.1317	2.65e-06	0.000639552	3.19412
WBGene00044325	tag-321	0.700072	4.03204	39.9087	2.63e-06	0.000639552	3.19412
WBGene00020360	math-41	-0.67121	4.64148	39.8356	2.67e-06	0.000641019	3.19313
WBGene00002245	lag-1	0.595789	5.17809	39.7212	2.72e-06	0.000650947	3.18645
WBGene00006493	ivns-1	0.565177	7.61174	39.5892	2.79e-06	0.000663158	3.17838
WBGene00022548	ZC196.4	1.70009	0.695979	39.2439	2.97e-06	0.000701583	3.15392
WBGene00255469	C25G4.17	4.03705	-1.67797	39.2204	2.98e-06	0.000701583	3.15392
WBGene00007867	C32H11.4	5.06442	6.83622	216.733	3.15e-06	0.000737825	3.13205
WBGene00018535	F47B7.4	-2.06823	0.590939	41.1706	3.24e-06	0.00075122	3.12423
WBGene00019977	fpn-1.2	1.27637	2.06442	38.7836	3.22e-06	0.00075122	3.12423
WBGene00019978	hacd-1	1.07398	5.97404	56.6916	3.25e-06	0.00075122	3.12423
WBGene00018731	F53A9.8	0.832826	3.36529	38.4756	3.41e-06	0.000783667	3.10587
WBGene00000963	dhp-1	0.556705	6.07098	38.4294	3.44e-06	0.00078646	3.10432
WBGene00008506	tkt-1	-0.661851	9.63068	38.2224	3.57e-06	0.000812951	3.08994
WBGene00014136	ZK896.5	1.44834	2.97622	49.2048	3.71e-06	0.000835697	3.07795
WBGene00021340	Y34F4.5	0.780937	3.3641	38.0407	3.69e-06	0.000835697	3.07795
WBGene00010357	H03A11.2	0.779943	4.24366	37.9356	3.77e-06	0.00084285	3.07425
WBGene00022096	Y69A2AR.25	7.62253	-1.02338	57.9513	3.78e-06	0.00084285	3.07425
WBGene00020107	R151.2	-0.812291	8.40954	41.1475	3.82e-06	0.00084898	3.0711
WBGene00003094	lys-5	-1.53259	0.772858	37.8067	3.86e-06	0.000852907	3.0691
WBGene00008239	fshr-1	-0.604763	5.25073	37.6927	3.94e-06	0.000867039	3.06196
WBGene00015949	C18A11.3	-0.675303	4.56841	37.6349	3.98e-06	0.000872285	3.05934
WBGene00003214	mel-32	-0.645623	9.37242	37.5295	4.06e-06	0.000883016	3.05403
WBGene00003858	ogt-1	0.641949	7.27796	37.5191	4.07e-06	0.000883016	3.05403
WBGene00000535	cpi-1	0.985266	4.55948	45.5232	4.36e-06	0.000941703	3.02609
WBGene00003038	lin-56	0.829572	3.09895	36.9529	4.52e-06	0.000972645	3.01205
WBGene00020557	T19B4.3	-0.614274	6.53578	36.8955	4.57e-06	0.000978724	3.00934
WBGene00003982	pes-9	-0.643542	8.29228	36.7314	4.72e-06	0.000997397	3.00113
WBGene00011340	ugt-30	1.19195	3.02347	41.0926	4.7e-06	0.000997397	3.00113
WBGene00015300	C01F1.5	-0.6405	5.50034	36.723	4.72e-06	0.000997397	3.00113
WBGene00303231	C53A3.4	-7.61859	-2.48216	38.9992	4.83e-06	0.00101454	2.99373
WBGene00015413	pdhb-1	-0.580145	8.01662	36.5223	4.91e-06	0.00102672	2.98855
WBGene00044394	B0034.7	-1.412	0.988749	36.2804	5.14e-06	0.00107019	2.97054
WBGene00019599	acds-10	-0.647709	6.20204	36.2474	5.17e-06	0.00107217	2.96974
WBGene00018984	F56F10.1	-0.574353	7.0142	36.1913	5.22e-06	0.00107891	2.96701
WBGene00045164	F59C6.15	4.47267	-2.05386	35.9024	5.52e-06	0.00113513	2.94496
WBGene00007777	C27D8.1	2.34587	-0.704499	35.8494	5.58e-06	0.0011417	2.94245
WBGene00015632	C09D4.1	-0.70754	5.18944	35.8207	5.61e-06	0.00114301	2.94195
WBGene00001766	gst-18	-2.1233	-0.759509	35.797	5.63e-06	0.00114325	2.94186
WBGene00001262	emb-8	-0.556991	7.23098	35.751	5.68e-06	0.00114843	2.93989
WBGene00008607	F09B12.3	-0.682373	8.96835	35.7024	5.74e-06	0.0011493	2.93957
WBGene00022471	rnf-145	-0.582176	5.23104	35.7243	5.71e-06	0.0011493	2.93957
WBGene00000895	dac-1	0.794596	3.56719	35.6179	5.83e-06	0.00116314	2.93437
WBGene00020258	T05E7.1	-0.60022	5.21157	35.4923	5.97e-06	0.00118661	2.92569
WBGene00003095	lys-6	-1.3635	1.19609	35.4679	6e-06	0.00118717	2.92549
WBGene00007868	C32H11.5	-4.36559	4.32371	155.97	6.06e-06	0.00119432	2.92288
WBGene00000007	aat-6	-0.691686	4.82154	35.3781	6.11e-06	0.00119725	2.92181
WBGene00015631	clec-89	-1.20117	1.50334	35.3591	6.13e-06	0.00119725	2.92181
WBGene00004193	prx-3	-0.607127	4.83453	35.2989	6.2e-06	0.00120127	2.92036
WBGene00022012	Y59H11AR.4	1.05262	2.22807	35.3148	6.18e-06	0.00120127	2.92036
WBGene00012834	Y43F8C.13	-0.604435	5.91776	35.1952	6.33e-06	0.00121065	2.91698
WBGene00020658	argn-1	1.86649	6.7959	91.1544	6.31e-06	0.00121065	2.91698
WBGene00021492	comt-5	0.963144	2.40232	35.2215	6.3e-06	0.00121065	2.91698
WBGene00044468	Y69A2AL.2	1.04885	3.01435	35.9627	6.4e-06	0.00122043	2.91349
WBGene00021081	pals-33	2.25814	-0.880645	35.0388	6.52e-06	0.00123791	2.90731
WBGene00001397	fat-5	-4.01468	4.34907	147.584	6.62e-06	0.00125121	2.90267
WBGene00002272	lec-9	0.637516	7.43462	34.8864	6.72e-06	0.00126388	2.8983
WBGene00016034	C24A3.4	-0.735517	3.75171	34.8703	6.74e-06	0.00126388	2.8983
WBGene00000005	aat-4	-0.764754	3.75073	34.7884	6.85e-06	0.00127915	2.89308
WBGene00016119	C25H3.10	2.07679	3.36675	71.3237	6.94e-06	0.0012913	2.88897
WBGene00008358	nspc-18	0.866928	3.64506	34.6033	7.1e-06	0.00131586	2.88079
WBGene00011003	R04B5.5	0.603599	4.35556	34.3942	7.4e-06	0.00136565	2.86466
WBGene00008412	D2030.2	0.600086	6.09606	34.1952	7.7e-06	0.00141477	2.84931
WBGene00013587	Y80D3A.9	-0.98386	3.61962	37.2474	7.73e-06	0.0014156	2.84906
WBGene00003648	nhr-58	0.805416	3.38075	34.0931	7.85e-06	0.00143239	2.84394
WBGene00001814	haf-4	-0.577924	8.09542	33.9829	8.03e-06	0.00145729	2.83645
WBGene00010136	F55H12.5	1.77737	-0.244863	33.9671	8.05e-06	0.00145729	2.83645
WBGene00020563	T19C3.5	-0.958676	2.91799	33.8717	8.21e-06	0.00147947	2.82989
WBGene00007672	fbxa-136	1.50871	0.972293	33.8142	8.3e-06	0.00148745	2.82756
WBGene00018877	aman-1	-1.06473	4.85168	47.9267	8.31e-06	0.00148745	2.82756
WBGene00020522	T15B7.10	-1.24125	1.60589	33.724	8.45e-06	0.00150624	2.8221
WBGene00003711	nhr-121	-0.719191	3.9786	33.6707	8.54e-06	0.00151656	2.81914
WBGene00010989	R03D7.2	-1.26034	2.61319	37.5789	9.45e-06	0.00167173	2.77683
WBGene00015141	ugt-46	-0.543496	6.85718	33.142	9.5e-06	0.00167359	2.77635
WBGene00008102	C44H9.7	2.47871	-0.5742	33.1231	9.53e-06	0.00167367	2.77633
WBGene00008856	F15D3.6	-0.574414	5.55684	33.0302	9.71e-06	0.00169897	2.76981
WBGene00015884	C17B7.10	1.77544	-0.155077	32.9004	9.97e-06	0.0017377	2.76003
WBGene00014097	ZK829.9	1.89749	0.216871	32.7736	1.02e-05	0.00177637	2.75047
WBGene00021082	zip-11	-1.01902	2.63851	32.7287	1.03e-05	0.00178602	2.74811
WBGene00010753	K10G4.4	-3.08392	-0.591782	36.5496	1.06e-05	0.00183119	2.73727
WBGene00017961	nhr-180	0.764858	3.1582	32.5071	1.08e-05	0.00185479	2.73171
WBGene00010928	clec-258	-1.33589	1.02398	32.485	1.09e-05	0.00185638	2.73133
WBGene00019746	M03A1.3	0.799694	2.72584	32.4255	1.1e-05	0.00187221	2.72764
WBGene00010174	F56H9.2	0.59265	5.68033	32.3857	1.11e-05	0.00188069	2.72568
WBGene00010994	lgc-25	-0.886262	2.78591	32.3622	1.11e-05	0.00188292	2.72517
WBGene00002139	inx-17	-0.571612	5.35212	32.2364	1.14e-05	0.00192514	2.71554
WBGene00020052	R13A5.10	-0.897646	3.31659	32.1879	1.15e-05	0.00193744	2.71277
WBGene00013215	Y54G11A.4	0.978245	3.32451	34.0208	1.18e-05	0.00196629	2.70635
WBGene00013541	lonp-2	-0.66549	5.9572	32.6496	1.18e-05	0.00196629	2.70635
WBGene00045401	eol-1	1.11066	1.47239	31.8714	1.23e-05	0.00204597	2.6891
WBGene00000967	dhs-3	-0.565776	6.95392	31.835	1.24e-05	0.00204689	2.68891
WBGene00020317	pdf-1	0.513868	6.06867	31.8476	1.24e-05	0.00204689	2.68891
WBGene00009856	clec-24	2.11501	-0.0146376	31.7608	1.26e-05	0.00207125	2.68377
WBGene00044212	Y68A4A.13	2.77277	-0.390571	36.9304	1.29e-05	0.00210832	2.67606
WBGene00017719	ldp-1	-0.648356	8.30903	31.6373	1.29e-05	0.00211018	2.67568
WBGene00012518	comt-2	2.17919	-0.727698	31.4522	1.34e-05	0.00218534	2.66048
WBGene00010422	H32K16.2	1.44076	1.2732	31.3711	1.38e-05	0.00222331	2.653
WBGene00011979	sysm-1	1.69958	2.69075	47.5429	1.37e-05	0.00222331	2.653
WBGene00007598	C15A11.4	1.31581	1.21896	31.2213	1.41e-05	0.00226965	2.64404
WBGene00006677	twk-24	0.702451	3.5324	31.012	1.47e-05	0.00236335	2.62647
WBGene00016943	acdh-1	-0.713655	11.2811	31.0222	1.52e-05	0.00242389	2.61549
WBGene00019322	ahcy-1	-0.614508	12.291	30.8548	1.52e-05	0.00242623	2.61507
WBGene00009395	clec-64	-0.988827	2.25915	30.732	1.56e-05	0.00247311	2.60676
WBGene00011167	chil-23	1.77532	0.000371982	30.7381	1.56e-05	0.00247311	2.60676
WBGene00004059	pmp-2	-0.539819	6.66961	30.7082	1.57e-05	0.00247722	2.60603
WBGene00013716	Y106G6H.1	-0.601991	5.57991	30.6814	1.58e-05	0.00248296	2.60503
WBGene00017012	acs-22	-0.554671	7.18847	30.6497	1.59e-05	0.0024913	2.60357
WBGene00016003	C18H9.5	1.02634	2.22804	30.4844	1.65e-05	0.00257158	2.5898
WBGene00007981	glb-11	0.709551	4.27268	30.1405	1.77e-05	0.00275795	2.55941
WBGene00009903	F49E12.10	-1.30628	2.09518	32.4683	1.89e-05	0.00292897	2.53328
WBGene00019730	asns-2	3.14201	8.24983	112.872	1.92e-05	0.00297381	2.52669
WBGene00022178	cest-25	-0.634284	6.17571	30.0253	1.97e-05	0.00304405	2.51655
WBGene00017592	F19C7.2	0.759477	3.7259	29.593	1.99e-05	0.00306186	2.51401
WBGene00007929	dmd-10	1.15198	1.09807	29.4983	2.03e-05	0.00311139	2.50705
WBGene00019017	F57F4.4	-1.42274	9.11564	57.8106	2.04e-05	0.00311139	2.50705
WBGene00000172	aqp-4	-0.569526	5.33809	29.4378	2.06e-05	0.00311546	2.50648
WBGene00004061	pmp-4	-0.620008	6.1993	29.4502	2.05e-05	0.00311546	2.50648
WBGene00044663	F26G1.10	1.2593	1.42832	29.462	2.05e-05	0.00311546	2.50648
WBGene00022441	Y110A2AL.4	1.64132	1.56501	35.4639	2.15e-05	0.00323797	2.48973
WBGene00006996	zyg-11	0.760622	5.6735	34.0056	2.17e-05	0.00324801	2.48838
WBGene00022788	slc-17.7	0.662822	4.86527	29.2084	2.17e-05	0.00324801	2.48838
WBGene00010988	metr-1	-0.596369	9.18649	29.1635	2.19e-05	0.0032649	2.48613
WBGene00012531	Y32F6B.1	-0.53068	6.27665	29.1197	2.21e-05	0.00328579	2.48336
WBGene00005648	srp-7	0.538198	6.84797	29.0659	2.23e-05	0.00331416	2.47963
WBGene00007559	C14A4.8	-1.70628	0.196384	29.0385	2.25e-05	0.00331724	2.47922
WBGene00021981	lgc-26	-0.631793	4.22122	29.0328	2.25e-05	0.00331724	2.47922
WBGene00014251	gstk-1	-0.657265	5.01398	28.9898	2.29e-05	0.00336028	2.47362
WBGene00010473	hrg-2	1.44044	1.34459	30.6029	2.3e-05	0.00337353	2.47192
WBGene00271567	T28F4.8	3.99243	-2.04495	28.8617	2.34e-05	0.0034118	2.46702
WBGene00021852	Y54F10AM.8	-0.529948	8.77288	28.8299	2.35e-05	0.00341442	2.46668
WBGene00022367	Y92H12BM.1	0.926709	3.72174	32.4449	2.35e-05	0.00341442	2.46668
WBGene00004191	prx-1	-0.594091	4.6681	28.7878	2.37e-05	0.00343555	2.464
WBGene00000973	dhs-9	-0.574449	5.91481	28.6435	2.45e-05	0.00353559	2.45154
WBGene00004195	prx-6	-0.62028	4.28797	28.5788	2.49e-05	0.00354325	2.4506
WBGene00012747	Y40H7A.10	0.869377	2.58501	28.5837	2.48e-05	0.00354325	2.4506
WBGene00019508	K07H8.8	-1.3974	0.867176	28.5793	2.49e-05	0.00354325	2.4506
WBGene00304201	T07H8.11	1.92527	-0.154816	28.5782	2.49e-05	0.00354325	2.4506
WBGene00012148	inos-1	-0.511854	7.5968	28.5402	2.51e-05	0.00355521	2.44913
WBGene00194815	Y43F8B.23	1.73517	-0.284928	28.5355	2.51e-05	0.00355521	2.44913
WBGene00011102	R07E3.1	-0.509506	8.32448	28.4998	2.53e-05	0.00357261	2.44701
WBGene00011364	cest-1.2	-0.561837	4.56706	28.2921	2.65e-05	0.00372587	2.42877
WBGene00018839	F54H5.2	1.99779	-0.334695	28.2833	2.65e-05	0.00372587	2.42877
WBGene00235133	T26H5.14	2.19415	-1.08974	28.16	2.73e-05	0.0038181	2.41815
WBGene00008671	F11A5.3	3.6328	-2.01013	28.0405	2.8e-05	0.00390955	2.40787
WBGene00185001	F56A8.9	0.749403	3.60552	27.9853	2.84e-05	0.00394633	2.40381
WBGene00010238	F58B4.5	-0.894018	5.1876	36.8827	2.9e-05	0.00401952	2.39583
WBGene00013575	acs-5	-0.512357	7.8424	27.8346	2.93e-05	0.00405772	2.39172
WBGene00235110	T14G12.12	-1.98944	0.331156	29.6644	2.95e-05	0.00406293	2.39116
WBGene00004093	ppw-1	0.533061	5.30599	27.7839	2.97e-05	0.0040682	2.3906
WBGene00016677	C45G9.6	0.603658	4.36685	27.789	2.96e-05	0.0040682	2.3906
WBGene00007677	C18D4.8	1.75141	0.183544	27.6728	3.04e-05	0.00415896	2.38102
WBGene00009393	clec-62	-0.645221	4.87284	27.6288	3.07e-05	0.00418813	2.37798
WBGene00011993	T24D5.5	4.43053	-2.30019	27.61	3.09e-05	0.00419375	2.3774
WBGene00016920	C54E4.5	0.573603	4.49795	27.553	3.13e-05	0.00423576	2.37307
WBGene00020220	clec-140	2.24914	0.0378893	32.1945	3.14e-05	0.00423724	2.37292
WBGene00001815	hmt-1	-0.506995	6.11203	27.4943	3.17e-05	0.00425535	2.37107
WBGene00017292	F09E5.16	0.835071	3.0058	27.5033	3.16e-05	0.00425535	2.37107
WBGene00017427	acp-5	-0.642922	4.3162	27.3758	3.25e-05	0.00435852	2.36066
WBGene00000002	aat-1	-0.702591	4.67295	28.6426	3.3e-05	0.00440718	2.35584
WBGene00011671	cyp-13A4	-1.56328	-0.313996	27.285	3.32e-05	0.00442401	2.35418
WBGene00003756	nlp-18	0.484327	5.35426	27.2325	3.36e-05	0.00446432	2.35024
WBGene00044488	Y54G2A.45	0.635577	5.95275	28.4722	3.39e-05	0.00448544	2.34819
WBGene00010859	M04C9.4	-0.868139	2.29626	27.0867	3.48e-05	0.00458404	2.33875
WBGene00016379	C33H5.13	0.606653	3.88416	27.0791	3.48e-05	0.00458404	2.33875
WBGene00000675	col-101	2.28713	1.60294	44.703	3.53e-05	0.00459708	2.33752
WBGene00001591	glc-1	0.702163	3.99718	27.012	3.54e-05	0.00459708	2.33752
WBGene00006950	wrt-4	-0.644124	6.28864	28.6988	3.54e-05	0.00459708	2.33752
WBGene00007394	C06H5.6	-0.55974	5.3725	27.0462	3.51e-05	0.00459708	2.33752
WBGene00012117	T28B11.1	0.579008	6.39494	27.0226	3.53e-05	0.00459708	2.33752
WBGene00018334	cyp-33E2	-0.627837	3.92537	26.9553	3.58e-05	0.00463731	2.33373
WBGene00016235	C29H12.2	-0.525027	7.33237	26.9095	3.62e-05	0.00467327	2.33038
WBGene00019495	sdz-24	-0.620693	5.85716	27.6196	3.64e-05	0.00468156	2.32961
WBGene00020847	cgr-1	-0.502807	5.98509	26.8511	3.67e-05	0.00471022	2.32696
WBGene00017759	sucl-2	-0.509684	6.73199	26.8028	3.71e-05	0.00474966	2.32334
WBGene00014103	best-26	-3.39311	-2.17364	26.6435	3.85e-05	0.0049133	2.30863
WBGene00004235	ptr-21	-0.580457	6.29254	26.6187	3.87e-05	0.0049237	2.30771
WBGene00010290	F58H1.7	0.578829	4.34131	26.6108	3.88e-05	0.0049237	2.30771
WBGene00012822	Y43F8B.12	2.42361	-1.31435	26.5604	3.92e-05	0.00496778	2.30384
WBGene00011429	T04C12.7	1.56608	0.145578	26.4628	4.01e-05	0.00503808	2.29774
WBGene00012478	mxt-1	-0.507163	6.47651	26.4786	4e-05	0.00503808	2.29774
WBGene00019673	K12C11.1	-0.522813	7.32032	26.4414	4.03e-05	0.00503808	2.29774
WBGene00021662	snpc-3.3	1.12571	2.01814	26.9072	4.03e-05	0.00503808	2.29774
WBGene00022643	ZK6.8	1.77807	3.9968	56.0504	4.03e-05	0.00503808	2.29774
WBGene00194695	B0462.5	2.08807	-0.893149	26.4221	4.05e-05	0.00504719	2.29695
WBGene00012960	Y47H10A.4	-0.668071	3.32929	26.3279	4.14e-05	0.00514471	2.28864
WBGene00017335	F10D2.10	-0.91318	2.43622	26.28	4.18e-05	0.0051885	2.28496
WBGene00000831	ctl-2	-0.570333	7.25556	26.2414	4.22e-05	0.00519354	2.28454
WBGene00006353	sur-7	-0.544463	4.77738	26.2371	4.23e-05	0.00519354	2.28454
WBGene00019779	endu-2	0.592573	8.32418	26.2493	4.21e-05	0.00519354	2.28454
WBGene00044287	F21H12.7	1.52572	-0.0329565	26.2305	4.23e-05	0.00519354	2.28454
WBGene00021546	laat-1	-0.504638	6.0097	26.1843	4.28e-05	0.00523583	2.28101
WBGene00012101	zip-10	2.65821	3.92305	75.3325	4.33e-05	0.00526813	2.27834
WBGene00021070	cpr-8	-0.787434	4.7726	30.8951	4.32e-05	0.00526813	2.27834
WBGene00018249	F40H3.1	0.497209	4.90337	26.1034	4.36e-05	0.00529392	2.27622
WBGene00015602	fbxa-158	2.49184	-0.926979	26.0781	4.39e-05	0.00531146	2.27479
WBGene00012947	Y47H9C.1	-1.88211	1.89526	38.9494	4.45e-05	0.00536383	2.27052
WBGene00012968	Y48A6B.7	0.731765	4.58598	28.3429	4.45e-05	0.00536383	2.27052
WBGene00013963	sulp-8	0.557286	4.87481	25.9925	4.47e-05	0.00537695	2.26946
WBGene00003958	pcp-3	-0.709437	8.01467	29.29	4.6e-05	0.0055187	2.25816
WBGene00019659	K11H12.3	2.03479	0.944422	34.3356	4.66e-05	0.00557533	2.25373
WBGene00001156	ech-7	-0.512231	6.54524	25.7326	4.75e-05	0.00567083	2.24635
WBGene00017300	rpc-2	-0.494615	7.90028	25.6999	4.79e-05	0.00570001	2.24412
WBGene00016714	C46F2.1	-0.807468	3.62197	26.6211	4.9e-05	0.00581186	2.23568
WBGene00017329	ugt-39	-0.784883	3.14815	25.5833	4.92e-05	0.00582908	2.2344
WBGene00006404	tag-10	-0.699241	7.46254	29.1016	4.99e-05	0.00589168	2.22976
WBGene00045096	K01A6.7	1.5341	0.0869353	25.4994	5.02e-05	0.00591569	2.22799
WBGene00007660	pals-6	1.68169	0.917832	29.2175	5.1e-05	0.00599154	2.22246
WBGene00004811	skr-5	2.50873	-1.42359	25.3407	5.22e-05	0.00608147	2.21599
WBGene00008425	D2045.8	-0.851463	3.98213	28.919	5.19e-05	0.00608147	2.21599
WBGene00018951	F56C9.7	-0.515786	6.66348	25.3403	5.22e-05	0.00608147	2.21599
WBGene00009466	F36D1.7	0.9789	1.82586	25.3197	5.24e-05	0.0060961	2.21495
WBGene00001578	ges-1	-0.517709	5.81714	25.2399	5.34e-05	0.0061972	2.2078
WBGene00002087	ins-4	-1.30039	2.06557	29.2126	5.39e-05	0.00621094	2.20684
WBGene00007876	dct-19	2.63337	-0.0698619	29.9461	5.37e-05	0.00621094	2.20684
WBGene00021236	pud-1.2	-1.608	0.594894	25.1995	5.39e-05	0.00621094	2.20684
WBGene00006915	vha-6	-0.534629	9.08426	25.0508	5.59e-05	0.00638935	2.19454
WBGene00018340	anmt-2	0.456681	5.8923	25.0497	5.59e-05	0.00638935	2.19454
WBGene00194665	ZK822.8	-1.40342	-0.13198	25.0522	5.59e-05	0.00638935	2.19454
WBGene00009311	mltn-1	0.631653	4.27407	24.9816	5.68e-05	0.00647829	2.18854
WBGene00008583	ugt-65	-0.543864	5.97383	24.9094	5.78e-05	0.00655929	2.18314
WBGene00011495	T05F1.11	-0.687496	4.05495	24.9174	5.77e-05	0.00655929	2.18314
WBGene00003828	nuc-1	0.493997	6.01987	24.8674	5.84e-05	0.00659644	2.18069
WBGene00077764	F59C6.16	1.6185	1.83535	32.7228	5.84e-05	0.00659644	2.18069
WBGene00021503	ctsa-4.2	-0.504684	6.42693	24.8533	5.86e-05	0.00660003	2.18045
WBGene00015163	B0361.9	1.32557	5.72702	49.1529	5.95e-05	0.00667571	2.1755
WBGene00018911	F56A4.3	-1.01465	1.39658	24.7934	5.94e-05	0.00667571	2.1755
WBGene00013935	ZK218.1	-1.11156	1.71482	24.7702	5.98e-05	0.00667951	2.17526
WBGene00195164	K12B6.11	-1.24091	1.31655	24.7635	5.98e-05	0.00667951	2.17526
WBGene00007422	ugt-17	-0.617383	5.16855	25.2744	6.02e-05	0.00669913	2.17398
WBGene00021898	Y54G2A.36	1.13082	1.06466	24.6632	6.13e-05	0.00680999	2.16685
WBGene00003786	npa-1	-0.566586	10.6719	24.5424	6.31e-05	0.00697818	2.15626
WBGene00015886	C17B7.12	1.12648	2.10653	26.1039	6.31e-05	0.00697818	2.15626
WBGene00017312	pitr-5	-1.11254	1.60321	24.4944	6.39e-05	0.00704298	2.15224
WBGene00003067	lrg-1	0.94586	2.10472	24.4773	6.41e-05	0.00705556	2.15147
WBGene00016957	atic-1	-0.508829	6.57636	24.1427	6.95e-05	0.0076342	2.11724
WBGene00020241	T05B4.10	2.87112	-1.45597	24.0773	7.07e-05	0.0077388	2.11133
WBGene00007302	C04F12.8	0.554587	4.27146	24.0549	7.1e-05	0.00776309	2.10997
WBGene00008205	sams-1	-0.537211	10.5138	23.9782	7.24e-05	0.00789155	2.10284
WBGene00015512	mthf-1	-0.516973	9.05388	23.8844	7.41e-05	0.00803757	2.09488
WBGene00020618	T20D4.12	0.707287	3.24038	23.8866	7.4e-05	0.00803757	2.09488
WBGene00013004	mrpl-37	-0.442041	6.05931	23.8341	7.5e-05	0.00811847	2.09053
WBGene00006609	tre-3	-0.524649	5.13354	23.8006	7.56e-05	0.00816663	2.08796
WBGene00011244	R11D1.3	0.739847	2.98588	23.6411	7.86e-05	0.00847001	2.07212
WBGene00021583	clec-72	-0.849291	5.7663	32.4309	7.88e-05	0.00847001	2.07212
WBGene00003514	myo-2	-0.86756	8.82564	31.8733	7.91e-05	0.00848509	2.07134
WBGene00013835	mlt-4	-0.588493	3.94453	23.6079	7.93e-05	0.00848509	2.07134
WBGene00002054	ifb-2	-0.536649	8.89019	23.5836	7.98e-05	0.00849731	2.07072
WBGene00010524	K03B8.6	-0.497084	5.47833	23.5894	7.96e-05	0.00849731	2.07072
WBGene00019225	bgal-2	-0.549505	4.67627	23.4537	8.24e-05	0.00875469	2.05776
WBGene00002274	lec-11	0.703778	4.48205	25.2953	8.35e-05	0.00885474	2.05282
WBGene00045415	Y43F8B.15	2.10856	-1.11071	23.3655	8.42e-05	0.00890766	2.05024
WBGene00000624	col-47	-0.689438	3.22817	23.342	8.47e-05	0.00891947	2.04966
WBGene00015366	C03A7.2	2.49206	-1.46448	23.3499	8.45e-05	0.00891947	2.04966
WBGene00007725	C25F9.5	0.658497	3.41405	23.3154	8.52e-05	0.00893839	2.04874
WBGene00012914	bcmo-1	-1.98182	-0.782662	23.3213	8.51e-05	0.00893839	2.04874
WBGene00010811	hmit-1.3	-0.577129	5.14869	23.2843	8.59e-05	0.00896985	2.04721
WBGene00020559	best-17	0.774145	4.36655	26.7587	8.59e-05	0.00896985	2.04721
WBGene00013088	Y51B9A.6	0.751585	2.71699	23.0877	9.02e-05	0.00939695	2.02701
WBGene00003731	nhx-3	0.662079	4.51205	24.0522	9.21e-05	0.00954964	2.02001
WBGene00014186	nhr-244	2.02959	1.58806	36.0145	9.2e-05	0.00954964	2.02001
WBGene00044166	C54C6.7	2.00347	1.0427	31.8731	9.39e-05	0.00971806	2.01242
WBGene00001577	gem-4	0.82415	1.98179	22.8897	9.48e-05	0.00976594	2.01029
WBGene00004259	pyr-1	-0.567674	8.7652	22.8897	9.48e-05	0.00976594	2.01029
WBGene00001522	gbh-1	-0.594579	4.29283	22.852	9.57e-05	0.00977278	2.00998
WBGene00003877	pept-1	-0.544365	8.46132	22.8538	9.57e-05	0.00977278	2.00998
WBGene00008132	gale-1	0.490729	7.1062	22.8589	9.55e-05	0.00977278	2.00998
WBGene00015198	clec-2	-7.25521	-2.93123	23.907	9.56e-05	0.00977278	2.00998
WBGene00020509	hex-1	-0.453241	6.28657	22.8179	9.65e-05	0.00983549	2.0072
WBGene00004236	ptr-22	-1.3163	2.07521	27.812	9.77e-05	0.00989364	2.00464
WBGene00007130	B0272.4	-0.545596	5.33143	22.7686	9.77e-05	0.00989364	2.00464
WBGene00011564	ugt-50	-0.519099	5.38727	22.7827	9.74e-05	0.00989364	2.00464
WBGene00000972	dhs-8	-0.833548	2.15256	22.7283	9.87e-05	0.00994659	2.00233
WBGene00002128	inx-6	-0.585688	4.44603	22.7218	9.89e-05	0.00994659	2.00233
WBGene00022858	ZK1193.2	0.496276	5.58169	22.7364	9.85e-05	0.00994659	2.00233
WBGene00000430	ceh-5	-2.69378	-1.70889	22.6527	0.000100621	0.0100998	1.99569
WBGene00003553	nas-37	-0.535362	7.67236	22.6354	0.000101059	0.0101006	1.99565
WBGene00016721	C46G7.1	-0.484327	5.65455	22.6369	0.000101021	0.0101006	1.99565
WBGene00018269	acs-11	0.461912	5.62625	22.537	0.000103605	0.010333	1.98578
WBGene00000081	ads-1	-0.470412	8.36835	22.5086	0.000104351	0.0103853	1.98358
WBGene00000067	act-5	-0.493902	10.4483	22.4211	0.000106695	0.010596	1.97486
WBGene00003844	odc-1	1.0758	7.36652	37.821	0.000107974	0.0107004	1.9706
WBGene00021337	Y34F4.2	-1.92835	-0.989231	22.3592	0.000108385	0.0107185	1.96987
WBGene00044513	nlp-70	0.867191	1.69424	22.3261	0.0001093	0.0107861	1.96713
WBGene00021011	W03G1.5	0.955635	1.6246	22.2722	0.000110809	0.0109121	1.96209
WBGene00019716	M01G5.3	-0.417403	5.84611	22.2491	0.000111465	0.0109473	1.96069
WBGene00022808	ZK697.8	3.26423	-1.87303	22.2431	0.000111633	0.0109473	1.96069
WBGene00007393	fbxa-157	1.09082	1.0234	22.2018	0.000112815	0.0110401	1.95703
WBGene00013294	pals-30	1.76627	-0.962531	22.153	0.000114232	0.0111323	1.95342
WBGene00017214	F07E5.9	4.14118	-2.16172	22.1572	0.00011411	0.0111323	1.95342
WBGene00019279	K01A2.4	1.07079	3.50443	29.4594	0.00011534	0.0112169	1.95013
WBGene00077761	zip-9	-0.468916	6.63705	22.0312	0.000117846	0.0114369	1.94169
WBGene00017948	mth-1	0.481844	4.89626	21.9936	0.000118989	0.011524	1.9384
WBGene00012909	spds-1	-0.473777	6.07036	21.9642	0.000119888	0.0115871	1.93602
WBGene00011670	fbxa-84	-1.02752	0.917697	21.9291	0.000120974	0.011668	1.933
WBGene00000930	dao-4	-1.55825	-0.200426	21.8546	0.000123312	0.0118448	1.92647
WBGene00019846	gpx-7	-0.676013	3.28554	21.859	0.000123175	0.0118448	1.92647
WBGene00017924	mrps-21	-0.526806	4.15716	21.8446	0.000123631	0.0118511	1.92624
WBGene00011668	clec-47	-4.07215	2.92987	65.5224	0.000124689	0.0119282	1.92343
WBGene00003758	nlp-20	0.518351	4.3757	21.7866	0.000125493	0.0119806	1.92152
WBGene00010440	ttr-51	0.487538	4.99502	21.749	0.000126713	0.012048	1.91908
WBGene00017756	F23F12.12	1.23085	2.7003	28.3314	0.000126576	0.012048	1.91908
WBGene00012139	T28F4.4	0.493444	4.30764	21.7285	0.000127388	0.0120877	1.91766
WBGene00015762	C14C6.8	3.2456	-2.02556	21.6442	0.000130193	0.0123288	1.90908
WBGene00001480	fmo-5	-0.478191	5.1599	21.6202	0.000131002	0.0123805	1.90726
WBGene00015206	B0495.7	-0.453377	7.97994	21.5741	0.000132575	0.0125039	1.90295
WBGene00008741	ctsa-1.2	-0.531267	8.69067	21.5346	0.00013394	0.0125857	1.90012
WBGene00016705	slcr-46.1	-0.486406	4.53375	21.5273	0.000134197	0.0125857	1.90012
WBGene00019515	ugt-19	-1.14619	3.86351	32.2099	0.000134248	0.0125857	1.90012
WBGene00019068	faah-3	-0.624963	4.8612	22.8566	0.000136053	0.0127295	1.89519
WBGene00010291	F58H10.1	-0.632804	5.20673	23.4502	0.000138572	0.0129394	1.88809
WBGene00008290	bgnt-1.8	-1.95975	2.07694	35.8768	0.000139132	0.0129659	1.8872
WBGene00015389	scav-1	-0.469409	6.79865	21.3694	0.000139819	0.013004	1.88592
WBGene00012688	Y39B6A.29	1.01972	1.42243	21.3349	0.000141082	0.0130955	1.88288
WBGene00016561	eri-6	0.517078	4.07901	21.2348	0.000144815	0.0134154	1.87239
WBGene00008499	cyp-37A1	-0.905792	6.17548	31.8804	0.00014572	0.0134727	1.87055
WBGene00001906	his-32	-0.740564	3.05185	21.1657	0.000147455	0.013602	1.8664
WBGene00268213	C17B7.15	0.853958	1.66342	21.1594	0.000147699	0.013602	1.8664
WBGene00011291	R102.4	-0.446047	5.68084	21.1106	0.000149601	0.0137501	1.86169
WBGene00008105	C45B11.2	1.98627	-0.833054	21.0865	0.00015055	0.0137833	1.86065
WBGene00017772	clec-1	0.52062	6.73547	21.0887	0.00015046	0.0137833	1.86065
WBGene00007112	B0035.13	0.467298	5.73369	21.0684	0.000151263	0.0138216	1.85944
WBGene00017027	D1044.1	-0.823555	3.72037	23.9817	0.00015359	0.0140069	1.85366
WBGene00010204	F57F5.1	0.535597	9.41957	20.9496	0.000156063	0.0142048	1.84756
WBGene00016571	not found	-0.846433	2.27234	20.9342	0.000156696	0.0142347	1.84665
WBGene00000964	dhp-2	-0.418813	5.47175	20.9222	0.000157192	0.0142522	1.84612
WBGene00013345	Y59A8B.8	-0.469234	4.30326	20.8852	0.000158733	0.0143641	1.84272
WBGene00007931	C34D1.4	0.587427	3.11932	20.7693	0.000163665	0.0147819	1.83027
WBGene00000830	ctl-1	-0.532498	4.80466	20.6273	0.000169942	0.0152904	1.81558
WBGene00021406	frm-5.2	0.851022	1.8364	20.6199	0.000170274	0.0152904	1.81558
WBGene00255600	F54H5.14	-0.688976	2.8088	20.6232	0.000170124	0.0152904	1.81558
WBGene00007450	C08F11.1	-0.826735	2.14654	20.5773	0.000172212	0.0153677	1.81339
WBGene00014006	ZK596.1	0.539753	5.62256	20.832	0.000171688	0.0153677	1.81339
WBGene00018572	lin-42	-0.586257	8.91957	21.5087	0.000171852	0.0153677	1.81339
WBGene00020007	R11F4.1	1.96885	6.81091	54.9273	0.000172446	0.0153677	1.81339
WBGene00021286	tald-1	-0.434169	8.16652	20.5597	0.000173017	0.0153893	1.81278
WBGene00000820	csp-2	-1.07196	1.05077	20.5354	0.00017414	0.0154599	1.81079
WBGene00010214	slc-9B.2	-0.620616	3.49081	20.4941	0.000176068	0.015572	1.80765
WBGene00022653	ZK105.1	-1.60804	-0.605154	20.5007	0.000175754	0.015572	1.80765
WBGene00001155	ech-6	-0.73096	9.7276	24.7703	0.000177054	0.0156298	1.80605
WBGene00019682	K12H4.7	-0.458276	9.23387	20.424	0.000179388	0.0157863	1.80172
WBGene00020325	bath-46	-0.798716	1.90425	20.4216	0.000179501	0.0157863	1.80172
WBGene00002025	hsp-60	-0.44673	9.28106	20.4128	0.000179923	0.0157938	1.80151
WBGene00016874	C52B11.5	-0.574612	3.78183	20.3736	0.000181818	0.0159006	1.79859
WBGene00018046	coa-3	-0.455712	4.71079	20.379	0.000181552	0.0159006	1.79859
WBGene00018958	cest-27	-0.602558	5.18672	21.8294	0.000183822	0.0160459	1.79464
WBGene00000190	arf-1.1	2.69209	1.90731	41.9503	0.000188024	0.0163233	1.78719
WBGene00000191	arl-7	1.3035	0.734814	20.2551	0.000187672	0.0163233	1.78719
WBGene00019812	R01H2.4	1.38794	-0.0882532	20.2477	0.000188044	0.0163233	1.78719
WBGene00016911	drn-1	0.593317	3.60141	20.2176	0.000189567	0.0164251	1.78449
WBGene00077636	Y46G5A.43	0.86355	2.07356	20.1225	0.000194471	0.0168189	1.7742
WBGene00001448	flp-5	0.437607	4.83494	20.1001	0.000195647	0.0168894	1.77239
WBGene00005427	srh-217	2.61609	-2.01415	20.0579	0.000197885	0.0170512	1.76825
WBGene00015729	C13A10.2	0.831035	2.06821	20.0112	0.000200389	0.0172049	1.76435
WBGene00017712	F22E5.17	-3.91992	-2.41536	20.0109	0.000200403	0.0172049	1.76435
WBGene00019655	K11G9.5	0.828521	4.03288	24.2127	0.000203166	0.0174103	1.75919
WBGene00045305	ZC250.4	1.08793	4.75144	32.8477	0.000203874	0.017439	1.75848
WBGene00003670	nhr-80	-0.470723	4.6727	19.9164	0.000205583	0.0175121	1.75666
WBGene00003753	nlp-15	0.451842	4.6938	19.923	0.000205218	0.0175121	1.75666
WBGene00010285	F58H1.2	-0.481019	4.70866	19.9116	0.000205849	0.0175121	1.75666
WBGene00010307	skat-1	-0.400258	5.89068	19.879	0.000207675	0.0176355	1.75361
WBGene00016004	C18H9.6	0.567448	5.92361	21.2651	0.000208626	0.0176842	1.75242
WBGene00003745	nlp-7	0.759545	2.11125	19.7916	0.000212652	0.0179281	1.74646
WBGene00004041	plg-1	-1.77316	-0.213325	20.6283	0.000212513	0.0179281	1.74646
WBGene00010658	K08D8.4	1.29535	3.75434	32.6395	0.000212385	0.0179281	1.74646
WBGene00014058	ZK673.2	0.419375	6.31415	19.748	0.000215179	0.0181087	1.74211
WBGene00044121	gcp-2.3	2.11043	-1.52604	19.7371	0.000215818	0.0181299	1.7416
WBGene00011897	scpl-4	-0.407195	7.06755	19.7159	0.000217065	0.0181371	1.74143
WBGene00016376	sec-10	0.426447	5.51818	19.7267	0.000216426	0.0181371	1.74143
WBGene00020954	W02G9.4	-0.493321	4.56514	19.7192	0.000216868	0.0181371	1.74143
WBGene00001119	dyf-3	-0.793637	2.37513	19.6243	0.000222544	0.0185215	1.73232
WBGene00010339	acl-1	-0.42589	5.56656	19.6192	0.000222851	0.0185215	1.73232
WBGene00020936	hrpf-1	0.438181	5.91511	19.6218	0.000222694	0.0185215	1.73232
WBGene00002117	ins-34	2.32133	-1.92033	19.5823	0.000225104	0.0186757	1.72872
WBGene00002008	hsp-4	0.720176	7.72032	24.5491	0.000229208	0.0189239	1.72299
WBGene00013943	ZK218.11	4.08731	-2.021	21.5765	0.000229308	0.0189239	1.72299
WBGene00020932	dhod-1	-0.390615	6.67904	19.5213	0.000228881	0.0189239	1.72299
WBGene00002055	ifc-1	-0.468704	7.14216	19.4995	0.000230252	0.0189685	1.72197
WBGene00022683	ZK185.3	-0.555322	3.99141	19.4466	0.000233605	0.019211	1.71645
WBGene00012862	Y45F3A.5	-4.48387	-2.93362	19.4166	0.000235529	0.0193353	1.71365
WBGene00001775	gst-27	-0.429194	6.41106	19.4047	0.000236304	0.019365	1.71298
WBGene00000853	cut-6	-0.850113	1.75787	19.3949	0.000236938	0.019383	1.71258
WBGene00014244	ZK1307.1	-0.721796	7.44563	24.6038	0.000237884	0.0194265	1.71161
WBGene00013073	hmit-1.1	-2.79026	4.08373	53.2388	0.000238463	0.0194399	1.71131
WBGene00000114	alh-8	-0.473262	10.4823	19.3402	0.000240515	0.0195732	1.70834
WBGene00000515	ckc-1	-0.49786	4.81793	19.3242	0.000241577	0.0196255	1.70718
WBGene00020672	T22B7.3	1.62812	3.8685	38.4412	0.000243805	0.0197723	1.70394
WBGene00012530	Y32F6A.5	-0.448075	6.74098	19.2746	0.000244893	0.0198262	1.70276
WBGene00020139	eppl-1	-1.22187	6.58099	37.0875	0.000247987	0.0200421	1.69806
WBGene00002044	hyl-2	-0.401131	6.41329	19.2146	0.000248969	0.0200861	1.6971
WBGene00014686	C25F9.t5	-6.398	-3.19712	19.9794	0.00024959	0.0200861	1.6971
WBGene00077594	nhr-151	0.827498	2.12309	19.2022	0.000249818	0.0200861	1.6971
WBGene00001239	elo-1	-0.433006	8.70265	19.1346	0.000254516	0.0204288	1.68976
WBGene00020247	T05B11.4	1.0206	0.920072	19.1247	0.000255212	0.0204497	1.68931
WBGene00206525	R74.10	0.700594	2.35077	19.0768	0.000258613	0.0206868	1.68431
WBGene00000993	dhs-30	-0.525668	4.53684	19.0559	0.000260116	0.0207312	1.68338
WBGene00007930	not found	2.99553	-1.34162	21.6923	0.000259701	0.0207312	1.68338
WBGene00010501	K02C4.2	0.750465	2.08646	19.0506	0.000260494	0.0207312	1.68338
WBGene00010659	K08D8.5	0.814717	2.13443	19.0247	0.000262368	0.0208338	1.68123
WBGene00015227	ddn-1	1.0436	1.27883	19.0205	0.000262672	0.0208338	1.68123
WBGene00018260	cyp-33C7	0.654104	3.1895	18.9058	0.00027116	0.0214706	1.66816
WBGene00011419	T04A11.4	1.32026	0.725654	19.6316	0.000272853	0.0215319	1.66692
WBGene00019620	fah-1	-0.427142	7.43441	18.8862	0.000272641	0.0215319	1.66692
WBGene00000281	cah-3	-0.436609	6.46321	18.8739	0.000273576	0.0215527	1.6665
WBGene00017873	F28A10.5	1.9103	-1.3969	18.8641	0.000274322	0.0215753	1.66604
WBGene00044489	pudl-1	2.14768	-1.33415	18.8254	0.00027729	0.0217722	1.6621
WBGene00007055	tag-196	0.410169	6.65884	18.807	0.00027871	0.0218471	1.66061
WBGene00018077	F35H12.5	-0.527397	3.68067	18.7757	0.000281154	0.0220018	1.65754
WBGene00009475	F36F2.1	0.454626	4.33272	18.7671	0.00028183	0.0220179	1.65722
WBGene00017861	F27D9.2	0.477509	4.37765	18.7144	0.000286001	0.0223067	1.65157
WBGene00014132	ZK896.1	-1.30783	-0.242053	18.7062	0.000286654	0.0223204	1.6513
WBGene00000541	cln-3.3	-0.583948	3.41703	18.6432	0.000291748	0.0226794	1.64437
WBGene00018345	F42C5.3	1.45	-0.544722	18.5969	0.000295551	0.022937	1.63946
WBGene00006470	tag-120	0.452653	4.46813	18.4671	0.000306505	0.0237478	1.62438
WBGene00019844	abts-4	0.427179	5.41527	18.4455	0.000308374	0.0238532	1.62245
WBGene00017108	cyp-43A1	-0.444519	4.31706	18.4051	0.000311902	0.0240863	1.61823
WBGene00002110	ins-27	0.488081	4.27671	18.3859	0.000313585	0.0241368	1.61732
WBGene00019368	txt-4	0.64092	4.50813	20.1433	0.000313524	0.0241368	1.61732
WBGene00000136	amt-4	-0.863696	5.7734	27.1585	0.000314443	0.0241586	1.61693
WBGene00007873	dod-21	2.22094	-1.0021	19.3859	0.0003157	0.0241586	1.61693
WBGene00017826	tag-340	-0.443864	5.61708	18.3595	0.00031593	0.0241586	1.61693
WBGene00020831	T26C12.1	-0.393024	7.3744	18.3607	0.000315822	0.0241586	1.61693
WBGene00016598	C42D4.13	0.946522	2.00252	18.7118	0.000317701	0.0242544	1.61521
WBGene00020837	slc-36.2	-0.44118	6.0561	18.3158	0.000319843	0.0243783	1.613
WBGene00018760	irg-3	-0.910358	4.33524	25.2399	0.000322647	0.0245521	1.60991
WBGene00009642	F42G4.5	-0.582045	3.46561	18.2594	0.000324977	0.0246893	1.60749
WBGene00271795	Y46C8AM.1	1.05081	0.626178	18.2412	0.000326655	0.0247766	1.60596
WBGene00021587	clec-76	2.79338	4.16678	48.7821	0.000328201	0.0248142	1.6053
WBGene00220140	Y34F4.7	2.40451	-1.86175	18.2244	0.000328209	0.0248142	1.6053
WBGene00013904	ugt-6	-1.10035	4.68899	30.1802	0.000334942	0.0252824	1.59718
WBGene00013614	clec-237	-2.49495	-0.473528	22.7084	0.000335681	0.0252975	1.59692
WBGene00010253	F58E6.4	2.50093	-1.60553	18.0531	0.000344541	0.025882	1.587
WBGene00013997	ZK550.3	-0.385853	7.89567	18.0566	0.000344207	0.025882	1.587
WBGene00018479	otpl-6	1.61928	-0.316287	17.9844	0.000351343	0.0263087	1.5799
WBGene00018730	F53A9.7	0.601264	2.82303	17.9881	0.000350975	0.0263087	1.5799
WBGene00044220	Y102A5C.35	-2.10196	-1.48087	17.9457	0.000355236	0.0265577	1.57581
WBGene00009813	haly-1	0.452811	6.49597	17.9254	0.000357299	0.0266694	1.57399
WBGene00011416	T04A11.1	1.30971	0.702649	18.7513	0.000359356	0.0267803	1.57218
WBGene00007755	C27A7.3	-0.608261	3.48146	17.8769	0.000362277	0.0269551	1.56936
WBGene00012031	gpdh-3	0.413973	7.5268	17.8711	0.000362882	0.0269574	1.56932
WBGene00007848	cytb-5.1	-0.383845	7.11642	17.8413	0.000365981	0.0271446	1.56632
WBGene00008010	C38D9.2	0.972491	1.1077	17.8241	0.000367786	0.0271924	1.56555
WBGene00012645	mrpl-22	-0.425715	5.74182	17.825	0.000367699	0.0271924	1.56555
WBGene00021801	Y53G8AL.3	-4.74513	-3.02359	18.4936	0.000368597	0.0272094	1.56528
WBGene00006920	vha-11	-0.411497	8.60886	17.8001	0.000370319	0.0272936	1.56394
WBGene00017261	acl-6	-0.379119	5.8602	17.7635	0.00037422	0.0275377	1.56007
WBGene00001455	flp-12	0.446297	4.6118	17.7542	0.000375225	0.0275685	1.55959
WBGene00010821	M01G12.7	3.13611	-2.26698	17.7407	0.000376676	0.0276277	1.55865
WBGene00016281	pals-32	2.21985	0.426024	24.9595	0.000377211	0.0276277	1.55865
WBGene00012984	Y48B6A.13	-0.425033	4.85846	17.7092	0.000380095	0.0277955	1.55602
WBGene00044811	F12E12.11	-1.23648	2.92043	25.272	0.000381996	0.027891	1.55454
WBGene00013636	Y105C5A.12	1.926	-0.82496	18.0915	0.000383145	0.0279314	1.55391
WBGene00005686	sru-23	2.65826	-2.26168	17.6595	0.000385559	0.0280245	1.55246
WBGene00019450	K06H6.2	3.43581	-0.5426	19.8265	0.000385617	0.0280245	1.55246
WBGene00003096	lys-7	1.30878	6.73536	35.7477	0.000388156	0.0280784	1.55163
WBGene00008595	clec-56	-0.427566	5.08139	17.6409	0.000387628	0.0280784	1.55163
WBGene00019380	K04C2.2	-0.38132	7.39196	17.6363	0.00038814	0.0280784	1.55163
WBGene00020576	T19D12.1	-0.42517	6.78225	17.6275	0.000389122	0.0281049	1.55122
WBGene00021002	W03F9.4	-0.975538	2.40623	19.5863	0.000389756	0.0281074	1.55118
WBGene00017681	slc-17.5	0.549302	4.16706	17.6051	0.000391642	0.0282	1.54975
WBGene00008886	F16C3.2	0.694204	2.48769	17.593	0.000393004	0.0282547	1.54891
WBGene00003748	nlp-10	0.466351	4.31004	17.5632	0.000396389	0.0284527	1.54588
WBGene00018624	F48G7.13	1.60357	-0.334421	17.6889	0.000396973	0.0284527	1.54588
WBGene00003545	nas-27	2.2786	3.9207	42.3405	0.000401964	0.0286958	1.54218
WBGene00009405	F35C11.6	0.628192	2.59487	17.5075	0.000402813	0.0286958	1.54218
WBGene00011997	nlp-51	0.663421	3.20279	17.5096	0.000402562	0.0286958	1.54218
WBGene00013621	clec-239	-2.12487	-0.280761	21.0949	0.000401543	0.0286958	1.54218
WBGene00013131	pigl-1	-0.44479	4.38976	17.494	0.000404381	0.0287638	1.54115
WBGene00009710	F44G3.10	-1.06637	0.621035	17.4877	0.000405116	0.0287724	1.54102
WBGene00013939	ZK218.5	3.3404	-0.750198	24.5454	0.00040712	0.0288341	1.54009
WBGene00022285	Y75B7AL.2	-0.804409	1.92144	17.4698	0.000407214	0.0288341	1.54009
WBGene00017751	F23F12.3	-0.657924	2.8403	17.4481	0.000409772	0.0289715	1.53803
WBGene00022200	fard-1	-0.468876	6.44897	17.4345	0.000411396	0.0290424	1.53697
WBGene00017777	F25B5.6	-0.481352	7.32569	17.4177	0.000413391	0.0291394	1.53552
WBGene00022910	C05D2.11	0.423206	4.58992	17.4067	0.000414708	0.0291884	1.53479
WBGene00015057	gad-3	0.482886	5.11746	17.3987	0.000415678	0.0292128	1.53443
WBGene00045293	fbxa-175	1.05323	0.543118	17.3753	0.000418496	0.0293667	1.53214
WBGene00044321	mrps-30	-0.367122	6.95592	17.3381	0.00042303	0.0296406	1.52811
WBGene00020326	math-38	4.0313	1.15755	38.8381	0.000427491	0.0298194	1.5255
WBGene00021875	Y54G2A.10	0.777059	4.1145	21.0345	0.000427307	0.0298194	1.5255
WBGene00044301	lgc-28	-0.713636	2.55841	17.3087	0.00042666	0.0298194	1.5255
WBGene00014838	cyp-13A9	-3.2377	-2.46189	17.2905	0.000428921	0.0298747	1.5247
WBGene00017089	poml-2	-0.812029	2.8888	18.3382	0.000433179	0.0301265	1.52105
WBGene00000133	amt-1	-1.38834	0.823567	18.2561	0.000434327	0.0301433	1.52081
WBGene00016912	clec-86	-0.783839	2.29495	17.2443	0.000434707	0.0301433	1.52081
WBGene00016759	C49A9.5	0.530248	4.02141	17.2159	0.000438324	0.0303492	1.51785
WBGene00007536	daf-36	-0.562458	4.29421	17.3269	0.000440707	0.0304692	1.51614
WBGene00002073	ima-2	-0.417157	6.98652	17.1576	0.000445828	0.0307779	1.51176
WBGene00044286	ugt-35	-3.86696	-2.32028	17.1817	0.000449525	0.0309875	1.50881
WBGene00002138	inx-16	-0.418591	6.4656	17.1001	0.000453355	0.0311681	1.50629
WBGene00012216	W02D9.10	1.02415	4.48194	26.6519	0.000453475	0.0311681	1.50629
WBGene00021865	fbxa-66	2.19887	-1.79071	17.081	0.000455892	0.0312884	1.50462
WBGene00016285	C31B8.12	-4.19072	-1.92713	19.3306	0.000457007	0.031319	1.50419
WBGene00015052	clec-52	-1.84184	5.47883	40.9373	0.000458787	0.0313493	1.50377
WBGene00020849	nhr-225	1.14749	0.290881	17.0636	0.000458223	0.0313493	1.50377
WBGene00021336	Y34F4.1	1.13087	0.371574	17.0349	0.000462081	0.0315285	1.5013
WBGene00008392	D1086.5	0.639754	3.02078	17.023	0.000463686	0.031592	1.50042
WBGene00022037	acs-13	-0.403881	7.64217	16.9811	0.000469417	0.031936	1.49572
WBGene00004210	ptc-3	-0.536841	8.58102	17.834	0.000471564	0.032	1.49485
WBGene00006530	tba-4	-0.412749	7.71009	16.9608	0.00047221	0.032	1.49485
WBGene00010793	LLC1.2	-0.414387	6.64196	16.9594	0.000472405	0.032	1.49485
WBGene00003053	lmp-1	-0.466552	7.93384	16.9081	0.000479561	0.032367	1.4899
WBGene00007145	B0334.5	-0.41775	5.24555	16.9109	0.000479169	0.032367	1.4899
WBGene00008879	F16B12.1	-1.07089	0.442098	16.9058	0.000479895	0.032367	1.4899
WBGene00021876	Y54G2A.11	0.798861	5.30091	23.4175	0.000480703	0.032375	1.48979
WBGene00001790	gst-42	-0.384662	5.55697	16.8424	0.000488916	0.0328809	1.48306
WBGene00010835	M03B6.3	-0.654098	6.81134	20.8241	0.000490746	0.0329567	1.48206
WBGene00044455	F23F12.13	-0.726197	1.86176	16.7774	0.000498356	0.0334198	1.476
WBGene00015161	pho-5	-0.403136	4.74736	16.7504	0.000502338	0.0336387	1.47316
WBGene00017658	F21C10.9	-1.9018	6.13375	40.9015	0.00050429	0.0337213	1.4721
WBGene00009246	gfm-1	-0.397014	8.1102	16.6625	0.000515541	0.0343755	1.46375
WBGene00010540	K03H1.5	-0.393829	6.24515	16.664	0.000515316	0.0343755	1.46375
WBGene00008304	C54D10.10	0.884655	2.07488	16.8234	0.000519412	0.0345721	1.46127
WBGene00010125	dod-22	1.68182	2.44926	27.7434	0.000519964	0.0345721	1.46127
WBGene00044338	nspc-3	-0.627966	3.07577	16.5922	0.000526372	0.0349486	1.45657
WBGene00022491	Y119D3B.14	-0.379523	4.96003	16.5757	0.000528965	0.0350711	1.45505
WBGene00000767	coq-8	-0.366582	7.15033	16.541	0.000534429	0.0353833	1.4512
WBGene00016566	eri-7	0.516583	3.77228	16.5342	0.000535508	0.0354047	1.45094
WBGene00019089	clec-206	-2.73174	3.0702	39.2432	0.000537925	0.0355144	1.4496
WBGene00189951	linc-29	1.19636	0.686792	16.6118	0.000539647	0.035578	1.44882
WBGene00015706	C12D5.3	0.635759	2.18555	16.5033	0.000540436	0.03558	1.44879
WBGene00014714	C54C8.8	2.31737	-1.88028	16.4631	0.000546941	0.0359577	1.44421
WBGene00018874	tag-234	-0.472379	3.93729	16.4355	0.000551438	0.0362026	1.44126
WBGene00019617	ctsa-2	-0.61003	9.28063	18.7127	0.00055587	0.0364426	1.43839
WBGene00009715	F44G4.6	0.737867	1.98615	16.3977	0.000557677	0.0365099	1.43759
WBGene00017705	F22E5.6	1.47174	0.0148233	16.3849	0.000559806	0.0365982	1.43654
WBGene00044034	Y38E10A.28	1.74925	-1.10739	16.3522	0.000565304	0.0369062	1.4329
WBGene00009165	gpx-1	-0.493509	4.50142	16.2813	0.00057739	0.0376428	1.42432
WBGene00012027	fbxa-127	1.69101	-0.693591	16.2256	0.000587095	0.0382223	1.41768
WBGene00016099	C25E10.10	-0.980676	1.39657	16.2128	0.000589354	0.0383162	1.41662
WBGene00001150	ech-1.1	-1.02309	2.54091	19.4944	0.000591461	0.0383999	1.41567
WBGene00008409	mpst-1	-0.365777	5.5943	16.1643	0.000597967	0.0387686	1.41152
WBGene00018866	nath-10	-0.358112	7.16395	16.147	0.000601083	0.0389168	1.40986
WBGene00000215	asp-2	-0.427277	9.64645	16.1391	0.000602514	0.0389193	1.40983
WBGene00011899	nlp-68	0.592872	2.53566	16.1376	0.000602782	0.0389193	1.40983
WBGene00009237	F28H7.3	0.404761	7.05047	16.122	0.000605607	0.039019	1.40872
WBGene00011681	T10B10.4	0.417917	5.7311	16.1199	0.000605991	0.039019	1.40872
WBGene00011271	flad-1	-0.378259	5.50252	16.0975	0.000610094	0.0392293	1.40639
WBGene00018903	F55G1.7	1.24971	0.383308	16.0843	0.000612519	0.0393313	1.40526
WBGene00013794	dct-13	6.6886	-3.27447	16.6403	0.00061393	0.0393679	1.40486
WBGene00001464	flp-21	0.51127	3.46014	16.0644	0.00061619	0.0394589	1.40386
WBGene00018267	F41C3.1	1.737	-1.31914	16.0509	0.000618692	0.0395651	1.40269
WBGene00010628	ceeh-2	-0.473129	3.79652	16.0187	0.000624723	0.0398963	1.39907
WBGene00044206	T26H5.9	2.34402	2.34517	32.3434	0.000630009	0.0401791	1.396
WBGene00020938	clec-218	0.957756	3.27388	20.4653	0.000633531	0.0403489	1.39417
WBGene00022274	Y73E7A.8	-0.614822	6.97982	19.1572	0.000635041	0.0403901	1.39372
WBGene00017262	F08F3.4	0.391255	6.58751	15.9223	0.000643155	0.0408508	1.3888
WBGene00015956	C18B2.5	-0.398558	8.03054	15.8786	0.000651702	0.0413377	1.38365
WBGene00001774	gst-26	-0.366694	6.01096	15.8494	0.000657491	0.0416485	1.3804
WBGene00011043	rbm-28	-0.353565	6.9873	15.8197	0.000663433	0.0419682	1.37708
WBGene00023489	F42A10.9	-0.489971	3.88347	15.7512	0.000677365	0.0427917	1.36864
WBGene00012604	nspe-2	1.03283	1.03049	15.7329	0.000681131	0.0429717	1.36682
WBGene00010070	nep-17	-0.517108	9.46684	16.2931	0.000687654	0.0432727	1.36379
WBGene00014137	clec-187	-0.483346	4.02279	15.6967	0.00068867	0.0432727	1.36379
WBGene00050935	Y37H2A.16	1.59198	-1.15849	15.699	0.000688191	0.0432727	1.36379
WBGene00013343	prp-6	-0.35235	7.29394	15.6896	0.00069016	0.0433082	1.36343
WBGene00018045	F35D11.4	-0.434073	4.827	15.6782	0.000692563	0.0434009	1.3625
WBGene00007071	AC3.5	0.480939	7.86072	15.9069	0.000704527	0.0440917	1.35564
WBGene00003530	nas-11	0.453951	6.02257	15.6522	0.000707596	0.0442247	1.35433
WBGene00011540	T06E6.10	0.461457	3.85844	15.5981	0.000709662	0.0442948	1.35365
WBGene00022570	sdz-35	2.36241	-1.64518	15.574	0.000714907	0.0445037	1.3516
WBGene00206509	Y102A5C.43	-2.42758	-1.13976	17.3015	0.000714289	0.0445037	1.3516
WBGene00015932	C17H12.6	1.17861	0.547919	15.5221	0.000726324	0.0451544	1.3453
WBGene00008161	C47F8.5	-1.31396	-0.297789	15.5175	0.000727337	0.0451575	1.34527
WBGene00011222	R10H10.3	-0.388492	6.56904	15.4648	0.000739169	0.0457708	1.33941
WBGene00017524	F16G10.9	-1.4808	-0.395905	15.4683	0.000738385	0.0457708	1.33941
WBGene00020566	ttr-7	0.745041	2.25045	15.4602	0.000740219	0.0457754	1.33937
WBGene00219316	F21A3.11	0.518389	3.94072	15.431	0.000746863	0.0461254	1.33606
WBGene00011677	cyp-13A1	1.31295	-0.112683	15.4117	0.000751289	0.0463377	1.33407
WBGene00015910	C17F4.2	-0.703501	1.98059	15.4048	0.000752897	0.0463759	1.33371
WBGene00001250	elt-2	-0.3727	5.15662	15.3898	0.000756368	0.0464516	1.333
WBGene00008558	F07H5.7	0.68072	2.14298	15.3847	0.000757552	0.0464516	1.333
WBGene00009609	oac-27	2.26893	-1.80917	15.3824	0.00075809	0.0464516	1.333
WBGene00023500	C11H1.9	-0.387273	6.96363	15.389	0.000756554	0.0464516	1.333
WBGene00001456	flp-13	0.417659	4.83546	15.3716	0.000760588	0.0465066	1.33249
WBGene00012456	Y17D7C.2	1.04445	1.02072	15.4494	0.000761964	0.0465066	1.33249
WBGene00020879	T28A11.17	0.990029	0.394588	15.3681	0.000761416	0.0465066	1.33249
WBGene00013855	cubn-1	-1.31894	4.1301	27.5127	0.000765071	0.0466355	1.33128
WBGene00010836	M03B6.4	1.01712	0.44356	15.329	0.000770628	0.0468124	1.32964
WBGene00013844	fbxa-50	1.55352	-0.784565	15.3275	0.000770969	0.0468124	1.32964
WBGene00020725	cnp-3	-0.836081	3.71323	19.2155	0.000769647	0.0468124	1.32964
WBGene00001158	ech-9	1.39459	3.51634	26.0451	0.000782134	0.0474289	1.32396
WBGene00016329	osr-1	-0.494031	5.74055	16.0614	0.000784306	0.0474991	1.32331
WBGene00006617	tars-1	-0.360576	8.55701	15.2556	0.000788232	0.0476753	1.32171
WBGene00018907	F55G1.15	0.694005	2.76706	15.2382	0.000792469	0.0478698	1.31994
WBGene00010425	lpin-1	-0.399321	7.35672	15.2019	0.000801392	0.0483465	1.31563
WBGene00020058	R13D11.4	0.446825	3.85013	15.196	0.000802844	0.0483719	1.31541
WBGene00018769	mnat-1	-0.375694	5.90725	15.1636	0.000810917	0.0487956	1.31162
WBGene00012067	sqst-3	3.47122	-2.49246	15.1409	0.000816626	0.0490761	1.30913
WBGene00015281	C01B10.7	-0.859976	1.20768	15.1297	0.000819476	0.0491843	1.30817
WBGene00021476	nsun-4	-0.415115	5.09836	15.106	0.000825503	0.0494827	1.30555
WBGene00000726	col-153	-0.518377	4.29969	15.0938	0.00082862	0.0496061	1.30446
WBGene00001452	flp-9	0.351966	5.87125	15.0419	0.000842053	0.0503459	1.29804
WBGene00019486	K07D4.6	-0.700435	2.29853	15.0238	0.000846817	0.0505663	1.29614
WBGene00001671	gpa-9	0.950586	0.450682	15.0068	0.000851294	0.050769	1.2944
WBGene00015297	sco-1	-0.345684	5.66686	14.9678	0.000861661	0.0513219	1.2897
WBGene00016067	C24H10.1	0.514378	3.41974	14.9521	0.000865892	0.0515085	1.28812
WBGene00011090	R07B7.6	0.470662	3.79336	14.9415	0.00086873	0.0516118	1.28725
WBGene00020453	fbxa-55	-0.812057	1.59929	14.926	0.000872941	0.0517964	1.2857
WBGene00017334	F10D2.8	-1.4556	-0.662007	14.9025	0.000879343	0.0521102	1.28308
WBGene00015878	C17B7.4	1.35855	-0.436022	14.8649	0.000889724	0.0526589	1.27853
WBGene00017499	pud-1.1	-1.10872	0.62171	14.8522	0.00089324	0.0528003	1.27736
WBGene00004451	rpl-37	0.724781	5.1031	19.5664	0.00089494	0.0528342	1.27709
WBGene00008410	D2023.6	-0.363419	5.19691	14.8018	0.000907421	0.0535036	1.27162
WBGene00015914	C17F4.8	1.6263	-1.18031	14.7676	0.000917167	0.0538075	1.26916
WBGene00021646	Y47G6A.21	-0.406751	5.01416	14.7717	0.000915988	0.0538075	1.26916
WBGene00044340	nspc-5	-1.40122	-0.438157	14.7711	0.000916175	0.0538075	1.26916
WBGene00195145	ZK666.15	1.27597	-0.307479	14.7754	0.000914939	0.0538075	1.26916
WBGene00019837	R02F2.8	0.512338	3.70342	14.755	0.000920801	0.0539532	1.26798
WBGene00010904	ugt-62	-1.21115	6.79196	28.2589	0.000924314	0.0540914	1.26687
WBGene00013837	fbxa-30	2.37655	-1.69685	14.7323	0.000927358	0.0542019	1.26599
WBGene00017151	EGAP9.3	0.713808	2.86835	15.1456	0.000933249	0.0544783	1.26378
WBGene00004145	pqn-62	0.385487	5.25214	14.6977	0.000937472	0.0546567	1.26236
WBGene00014759	F46A8.1	0.878806	1.46358	14.693	0.000938865	0.0546677	1.26227
WBGene00019836	R02F2.7	-0.356317	5.88028	14.6891	0.000939993	0.0546677	1.26227
WBGene00006936	glp-4	-0.493223	8.78746	15.2144	0.000946818	0.0549283	1.2602
WBGene00015839	math-10	1.87564	-1.31605	14.6681	0.000946215	0.0549283	1.2602
WBGene00007453	fbxa-98	0.928764	0.821354	14.6561	0.000949775	0.0550317	1.25939
WBGene00014175	ZK971.1	0.711706	1.5013	14.6377	0.000955285	0.0552827	1.25741
WBGene00021858	Y54F10BM.3	1.05539	0.464843	14.6319	0.000957044	0.0553162	1.25715
WBGene00011906	hsp-12.1	0.545411	2.96047	14.6153	0.000962031	0.055536	1.25543
WBGene00003799	npp-13	-0.33817	6.65973	14.6072	0.000964484	0.0555408	1.25539
WBGene00044337	nspc-2	-1.3927	-0.450709	14.6101	0.000963613	0.0555408	1.25539
WBGene00022230	Y73B6A.3	-0.52589	3.37113	14.5967	0.000967684	0.0556566	1.25448
WBGene00007630	har-1	-0.446021	7.91393	14.5888	0.000970099	0.055659	1.25446
WBGene00021296	Y25C1A.13	-0.42636	4.86851	14.5903	0.000969615	0.055659	1.25446
WBGene00019293	K02A6.2	1.19885	-0.0657661	14.5761	0.00097398	0.0558134	1.25326
WBGene00004157	pqn-75	0.589065	3.2903	14.5529	0.000981102	0.0561528	1.25063
WBGene00000022	abt-4	-0.440595	5.76123	14.5432	0.000984116	0.0562299	1.25003
WBGene00018259	F41B4.3	0.558886	2.66506	14.537	0.000986048	0.0562299	1.25003
WBGene00021008	W03F11.5	0.707626	2.28413	14.5392	0.000985357	0.0562299	1.25003
WBGene00012443	Y15E3A.4	0.424892	6.33637	14.5328	0.000987334	0.0562348	1.24999
WBGene00010419	atp-1	-0.406054	11.4701	14.5091	0.000994731	0.0565874	1.24728
WBGene00016860	cyp-33C9	-0.425739	3.97964	14.4767	0.00100495	0.0570995	1.24337
WBGene00017322	clec-160	-0.375361	4.90077	14.4637	0.0010091	0.0572656	1.24211
WBGene00012529	Y32F6A.4	-0.508069	6.17295	15.7819	0.001022	0.057606	1.23953
WBGene00018900	rod-1	0.386752	5.59715	14.4398	0.00101673	0.057606	1.23953
WBGene00019819	aass-1	0.540132	8.20658	16.0049	0.00101838	0.057606	1.23953
WBGene00020426	T10H10.2	-0.478547	5.36768	14.9293	0.00101925	0.057606	1.23953
WBGene00020788	nep-22	-0.38465	8.48127	14.422	0.00102247	0.057606	1.23953
WBGene00045208	F13E9.15	0.713823	2.27096	14.4256	0.00102133	0.057606	1.23953
WBGene00008914	F17C11.2	0.391534	4.66076	14.412	0.00102572	0.0576505	1.2392
WBGene00011184	R09H10.7	-0.781563	1.30404	14.4123	0.00102562	0.0576505	1.2392
WBGene00010984	nkat-3	-0.370621	6.15917	14.4069	0.00102739	0.0576751	1.23901
WBGene00008353	D1025.1	0.505618	3.86689	14.3939	0.0010316	0.0578425	1.23775
WBGene00011181	R09H10.3	-0.458596	4.15517	14.3707	0.00103923	0.0582005	1.23507
WBGene00008357	nspc-16	0.658975	3.16362	14.7607	0.00104624	0.0583839	1.23371
WBGene00008511	F01G10.9	0.514185	4.11174	14.3517	0.00104548	0.0583839	1.23371
WBGene00022337	pals-16	0.742126	1.97302	14.3563	0.00104397	0.0583839	1.23371
WBGene00004978	spg-7	-0.357203	7.57172	14.3291	0.001053	0.0586911	1.23143
WBGene00011064	adsl-1	-0.376823	6.73866	14.3203	0.00105595	0.058786	1.23073
WBGene00001983	hoe-1	-0.368949	6.55638	14.2939	0.00106484	0.0592102	1.2276
WBGene00014171	nep-26	0.463156	4.82714	14.2838	0.00106824	0.059329	1.22673
WBGene00006980	zig-3	-1.79996	2.3008	24.5805	0.00107018	0.0593668	1.22646
WBGene00018966	F56D2.5	0.702285	3.57266	15.8488	0.00109044	0.0604075	1.21891
WBGene00044150	VB0395L.1	-0.698819	1.8475	14.216	0.00109152	0.0604075	1.21891
WBGene00010705	cyp-14A1	0.698794	2.32093	14.202	0.00109642	0.0606069	1.21748
WBGene00017125	acdh-12	-0.379965	7.25344	14.1962	0.00109842	0.0606461	1.2172
WBGene00012713	bckd-1A	-0.381129	7.63254	14.1511	0.00111434	0.0614524	1.21146
WBGene00044807	T19H5.6	1.56024	-0.219575	14.9897	0.00111693	0.0615229	1.21096
WBGene00000981	dhs-18	-0.44268	6.03568	14.3464	0.00111863	0.0615446	1.21081
WBGene00000991	dhs-28	-0.388306	8.84923	14.1152	0.00112718	0.0618698	1.20852
WBGene00021660	nol-14	-0.330818	6.3995	14.1152	0.00112718	0.0618698	1.20852
WBGene00008483	E04D5.4	-0.7265	1.64155	14.1099	0.00112907	0.0619005	1.20831
WBGene00044538	T09D3.8	-1.56432	0.403757	16.5296	0.00113365	0.0620794	1.20705
WBGene00219451	F52D2.12	-0.775069	2.43214	14.6215	0.00114049	0.0623809	1.20495
WBGene00021580	clec-174	-1.48296	-1.00022	14.0586	0.00114775	0.0627049	1.2027
WBGene00006845	unc-122	-0.686549	3.43999	15.324	0.00115063	0.0627692	1.20225
WBGene00009984	F53F1.6	0.762187	2.09017	14.0481	0.0011516	0.0627692	1.20225
WBGene00044316	F41G3.21	0.725004	2.6706	14.3025	0.00115399	0.062826	1.20186
WBGene00004172	pqn-92	0.457346	4.99755	14.0362	0.0011693	0.0635858	1.19664
WBGene00013870	ZC373.5	-0.449819	4.06812	13.9881	0.00117395	0.0637644	1.19542
WBGene00020770	eat-17	-0.453592	6.16768	14.4424	0.00117959	0.063997	1.19384
WBGene00013227	Y56A3A.6	-0.444222	5.59405	14.0836	0.00118306	0.0641108	1.19307
WBGene00003062	lpd-6	-0.37746	7.61521	13.9275	0.00119699	0.0645371	1.19019
WBGene00010019	F54B8.4	0.808077	1.80112	13.9313	0.00119554	0.0645371	1.19019
WBGene00018241	F40G9.5	-0.724767	2.73792	14.4534	0.00119539	0.0645371	1.19019
WBGene00021248	Y22D7AL.10	-0.357104	8.32559	13.9254	0.00119781	0.0645371	1.19019
WBGene00219283	F55H12.7	2.21302	-1.91848	13.9287	0.00119655	0.0645371	1.19019
WBGene00005424	srh-214	6.34096	-3.51758	14.3401	0.00120553	0.0648784	1.1879
WBGene00019272	H42K12.3	-0.688486	8.32473	18.048	0.00121105	0.0651006	1.18641
WBGene00012860	acdh-11	-0.377116	6.14674	13.8752	0.00121727	0.0653605	1.18468
WBGene00017691	ilys-5	-0.434503	8.33694	13.8578	0.00122413	0.0656535	1.18274
WBGene00022021	Y61A9LA.10	-0.354452	7.16534	13.851	0.00122683	0.0657228	1.18228
WBGene00013002	Y48E1B.3	-0.343173	5.56959	13.8285	0.00123572	0.0661237	1.17964
WBGene00008490	F01D4.8	-0.750202	2.41626	13.9831	0.00123821	0.0661814	1.17926
WBGene00015702	C11D2.4	-0.358192	5.51808	13.8054	0.00124497	0.066467	1.17739
WBGene00002012	hsp-12.3	-1.54534	-0.689336	13.7953	0.00124903	0.0666081	1.17647
WBGene00012134	T28F3.8	-0.383566	5.4653	13.788	0.00125198	0.0666896	1.17594
WBGene00007657	pals-3	6.10322	-3.15547	14.2052	0.00125615	0.0668355	1.17499
WBGene00000198	art-1	-0.351311	7.93322	13.77	0.00125925	0.0668385	1.17497
WBGene00007018	mdt-18	-0.441127	4.49543	13.767	0.00126048	0.0668385	1.17497
WBGene00007347	C05G5.1	0.417134	4.69725	13.7703	0.00125915	0.0668385	1.17497
WBGene00002891	let-767	-0.342964	8.4392	13.7394	0.00127179	0.0673618	1.17159
WBGene00008900	F16H6.10	-0.437748	4.11467	13.7228	0.0012786	0.0674754	1.17085
WBGene00009274	F30F8.5	-0.442821	4.21507	13.7202	0.00127969	0.0674754	1.17085
WBGene00009686	ent-7	-0.48241	4.27002	13.7214	0.00127919	0.0674754	1.17085
WBGene00016664	C45E5.1	-0.51618	4.60481	14.4196	0.00127795	0.0674754	1.17085
WBGene00010212	fbxa-192	-0.636318	1.79117	13.714	0.00128226	0.0674969	1.17072
WBGene00020023	frpr-16	0.670108	1.97401	13.7123	0.00128298	0.0674969	1.17072
WBGene00009082	dlat-1	-0.36446	8.71019	13.7017	0.00128737	0.0676518	1.16972
WBGene00019318	K02E10.4	-0.585908	6.0507	16.5331	0.00130172	0.0683293	1.16539
WBGene00012383	ttr-17	0.522473	4.5782	14.3416	0.00133296	0.0698128	1.15606
WBGene00016316	C32D5.8	0.338964	5.84938	13.595	0.00133267	0.0698128	1.15606
WBGene00004706	rsr-1	-0.328595	6.23692	13.5815	0.00133854	0.0700266	1.15474
WBGene00006675	twk-22	-0.61442	3.38933	13.9341	0.00134685	0.070383	1.15253
WBGene00016694	C45H4.13	-6.02555	-3.5799	13.9724	0.00134918	0.0704263	1.15226
WBGene00019182	H10E21.1	-0.513652	3.93829	13.5354	0.00135872	0.0708453	1.14969
WBGene00008434	D2089.3	0.730123	1.89976	13.5183	0.00136631	0.0710082	1.14869
WBGene00010778	gpdh-2	-0.422461	7.41887	13.519	0.00136598	0.0710082	1.14869
WBGene00011754	T13F3.7	-1.21995	-0.276906	13.5181	0.00136639	0.0710082	1.14869
WBGene00009369	F33H2.6	-0.412621	5.85404	13.4895	0.00137916	0.0715929	1.14513
WBGene00022639	nhr-253	1.47579	-0.969747	13.4725	0.00138686	0.0719126	1.14319
WBGene00016844	sucg-1	-0.338169	6.64044	13.454	0.00139522	0.0722464	1.14118
WBGene00022142	Y71G12B.2	0.982947	0.175536	13.4515	0.00139638	0.0722464	1.14118
WBGene00010706	cyp-14A2	-0.814238	1.12933	13.447	0.00139842	0.0722724	1.14103
WBGene00015705	nhr-152	0.868765	0.687167	13.4096	0.0014156	0.0730798	1.1362
WBGene00000214	asp-1	-0.441789	11.9801	13.404	0.00141819	0.0731325	1.13589
WBGene00017369	F10G7.5	-0.329506	5.82255	13.3316	0.00145217	0.0747209	1.12656
WBGene00019928	clec-44	2.18379	-1.98462	13.3347	0.00145071	0.0747209	1.12656
WBGene00012608	hphd-1	-0.892756	9.56706	20.2388	0.00146262	0.0751756	1.12392
WBGene00010215	nhr-193	0.601188	2.09875	13.3022	0.00146622	0.0752784	1.12333
WBGene00019104	asp-7	1.78594	-1.10278	13.4105	0.00146801	0.0752875	1.12328
WBGene00006636	tsp-10	0.611085	4.22429	14.9346	0.00147406	0.0754943	1.12209
WBGene00020632	T20F7.5	-0.644516	2.13916	13.2835	0.00147526	0.0754943	1.12209
WBGene00013711	Y106G6G.2	0.42001	4.19567	13.2716	0.00148101	0.0757062	1.12087
WBGene00020229	T05A8.3	0.370165	4.64045	13.2669	0.00148329	0.0757397	1.12068
WBGene00044445	C02F5.14	-0.446596	4.28958	13.255	0.00148908	0.075953	1.11946
WBGene00010754	K10G4.5	2.54929	-1.30006	13.2414	0.00149575	0.0762016	1.11804
WBGene00015225	B0507.8	0.99977	0.668544	13.2385	0.00149721	0.0762016	1.11804
WBGene00220000	K02F2.11	-1.10159	0.073336	13.2039	0.00151432	0.0769888	1.11357
WBGene00009835	F47H4.2	1.62158	2.63171	22.1916	0.00151714	0.0770487	1.11323
WBGene00022690	math-49	1.2495	-0.578538	13.1916	0.00152046	0.0771339	1.11275
WBGene00008594	clec-57	-0.357415	4.8547	13.1834	0.00152455	0.0771743	1.11253
WBGene00017447	F14B8.5	-0.36515	5.94523	13.185	0.00152377	0.0771743	1.11253
WBGene00007695	cest-9.2	-0.465877	4.23184	13.1767	0.0015279	0.0772604	1.11204
WBGene00020448	fbxa-51	-0.909158	0.463928	13.1654	0.00153364	0.0774668	1.11088
WBGene00012471	Y17G7B.20	-0.351463	8.07597	13.1434	0.00154476	0.0779449	1.10821
WBGene00020662	T21H3.1	-0.539289	9.46559	14.6067	0.00155883	0.07857	1.10474
WBGene00004182	prk-1	0.368222	5.04611	13.0876	0.00157344	0.0791329	1.10164
WBGene00008954	F19C6.5	-0.57068	2.73611	13.0856	0.00157449	0.0791329	1.10164
WBGene00011254	R12G8.1	0.611131	2.03229	13.0813	0.00157674	0.0791329	1.10164
WBGene00050974	Y6G8.9	-1.95848	-1.85748	13.0813	0.00157675	0.0791329	1.10164
WBGene00002120	ins-37	-2.18967	-2.2078	13.0692	0.00158305	0.0793643	1.10037
WBGene00001459	flp-16	0.36096	4.70595	13.0324	0.00160244	0.0802505	1.09555
WBGene00016201	tdo-2	0.519747	7.73851	14.5844	0.0016053	0.0803077	1.09524
WBGene00007001	tufm-2	-0.319483	6.56518	13.0229	0.00160747	0.0803308	1.09512
WBGene00017805	F26A1.7	2.0478	-1.82272	13.003	0.00161807	0.0807743	1.09273
WBGene00008498	F01D5.8	0.579833	2.71291	12.9982	0.00162067	0.080818	1.09249
WBGene00021367	Y37E11AM.3	-0.398671	4.45898	12.9739	0.00163375	0.0813837	1.08946
WBGene00021923	Y55F3AM.5	-0.4161	3.90257	12.9594	0.00164164	0.0816897	1.08783
WBGene00004185	pro-1	-0.336124	5.59762	12.9472	0.00164827	0.0818772	1.08684
WBGene00012145	nlp-46	0.80963	0.817312	12.9461	0.0016489	0.0818772	1.08684
WBGene00219609	linc-7	-0.608896	2.80018	12.9176	0.00166455	0.0825668	1.08319
WBGene00021281	ell-1	-0.336953	6.94991	12.828	0.00171489	0.084974	1.07071
WBGene00008352	fbxa-6	-0.440408	3.47254	12.8241	0.00171708	0.0849926	1.07062
WBGene00003996	pgp-2	-0.336253	6.77292	12.8151	0.00172227	0.0851596	1.06977
WBGene00016360	C33G8.2	0.732219	2.45375	13.2209	0.00172497	0.0852032	1.06954
WBGene00011950	T23F6.2	1.48002	-0.796304	12.8062	0.00172735	0.0852312	1.0694
WBGene00271744	K09F6.15	-0.715094	1.42606	12.7882	0.00173779	0.0856558	1.06724
WBGene00022260	Y73C8B.3	-0.340422	5.21271	12.7729	0.00174665	0.0860025	1.06549
WBGene00001095	dars-2	-0.341416	4.75711	12.7624	0.0017528	0.0862146	1.06442
WBGene00009842	igeg-2	0.551965	2.65757	12.7429	0.00176425	0.0865959	1.0625
WBGene00020364	T08E11.8	2.06725	-1.69532	12.745	0.00176298	0.0865959	1.0625
WBGene00219449	Y38A10A.11	-1.36018	-0.864829	12.7394	0.00176626	0.0866038	1.06246
WBGene00014941	Y67H2A.9	-0.358292	4.89497	12.7236	0.00177566	0.0869739	1.06061
WBGene00003664	nhr-74	2.1571	5.44109	26.9399	0.0017836	0.0872717	1.05913
WBGene00009469	F36D3.1	-0.506699	4.02618	12.7913	0.00178957	0.0874723	1.05813
WBGene00009997	F53F4.15	-1.08866	-0.284489	12.6912	0.00179495	0.0876442	1.05728
WBGene00003990	pfn-2	-0.392613	6.9249	12.6693	0.00180814	0.0881119	1.05497
WBGene00045455	F26G1.11	0.625345	2.7646	12.6691	0.00180829	0.0881119	1.05497
WBGene00010794	dld-1	-0.34763	8.76324	12.6595	0.00181413	0.0882128	1.05447
WBGene00017716	sups-1	-0.454654	7.32859	13.3191	0.00181266	0.0882128	1.05447
WBGene00001753	gst-5	-0.42983	5.92844	12.9915	0.00181701	0.0882614	1.05423
WBGene00000035	ace-1	0.393602	4.5498	12.6291	0.00183269	0.0886556	1.05229
WBGene00003773	nlt-1	-0.385652	6.56485	12.6357	0.00182866	0.0886556	1.05229
WBGene00012407	Y7A5A.1	-0.357981	6.56794	12.6312	0.00183141	0.0886556	1.05229
WBGene00021686	nsun-2	-0.318152	7.39725	12.6299	0.00183216	0.0886556	1.05229
WBGene00015223	B0507.6	1.67628	-1.1978	12.6052	0.00184746	0.0892778	1.04926
WBGene00008849	try-10	1.51267	-1.10167	12.5992	0.00185115	0.0893642	1.04884
WBGene00021796	Y52E8A.3	0.62273	1.96242	12.5675	0.00187098	0.0902284	1.04466
WBGene00021158	Y4C6B.4	-0.585226	3.00536	12.5471	0.00188383	0.090755	1.04213
WBGene00007375	C06C3.4	-0.506554	2.81663	12.5259	0.00189729	0.0913093	1.03948
WBGene00020981	W03D2.6	0.541749	2.66064	12.5224	0.00189956	0.091325	1.03941
WBGene00019464	K07B1.4	0.511412	4.28052	13.0058	0.00190404	0.0914465	1.03883
WBGene00003119	mac-1	-0.324029	6.53026	12.5093	0.00190791	0.0915389	1.03839
WBGene00023187	Y67D8C.12	-1.13812	0.301322	12.6112	0.0019218	0.0921014	1.03573
WBGene00302974	Y65B4BM.3	-0.425237	7.29902	12.7269	0.00192357	0.0921014	1.03573
WBGene00009259	hpo-34	-0.348516	9.09336	12.4818	0.00192566	0.0921074	1.03571
WBGene00002095	ins-12	-1.18098	0.350298	12.9082	0.00193225	0.0921404	1.03555
WBGene00021857	iffb-1	-0.353287	8.21989	12.4722	0.0019319	0.0921404	1.03555
WBGene00044350	Y73B6BL.44	0.543682	3.40616	12.4738	0.00193087	0.0921404	1.03555
WBGene00015266	BE0003N10.1	-0.364007	4.86823	12.4571	0.00194178	0.0925009	1.03385
WBGene00007786	rmd-2	-0.407998	7.10623	12.4446	0.00196957	0.0937295	1.02812
WBGene00021355	Y37E3.17	-0.340988	8.08093	12.4098	0.00197299	0.0937972	1.02781
WBGene00077549	F11A6.3	1.89837	-1.61545	12.3995	0.00197991	0.0940306	1.02673
WBGene00006844	unc-120	0.395468	5.40688	12.3928	0.00198435	0.0940511	1.02664
WBGene00017574	pxmp-4	-0.405427	4.78233	12.3952	0.00198276	0.0940511	1.02664
WBGene00011453	ugt-56	0.883073	1.62712	12.9003	0.00198794	0.0941259	1.02629
WBGene00007853	C31G12.4	1.62146	-1.07109	12.3586	0.00200742	0.0949009	1.02273
WBGene00018561	gadr-3	1.11606	-0.455236	12.3573	0.00200835	0.0949009	1.02273
WBGene00013592	Y81G3A.4	-0.533145	2.83199	12.3496	0.00201354	0.09505	1.02205
WBGene00011927	T22C8.6	0.676967	3.74079	14.167	0.00201579	0.0950608	1.022
WBGene00009974	F53C11.4	0.37674	6.38434	12.3334	0.00202463	0.0953814	1.02054
WBGene00007560	C14A4.9	-0.416888	5.75884	12.4847	0.00202712	0.095403	1.02044
WBGene00010872	M05B5.4	0.386075	4.26882	12.3238	0.00203121	0.0954993	1.02
WBGene00009416	F35E2.9	1.24531	-0.387038	12.304	0.00204493	0.0960484	1.01751
WBGene00021797	plep-1	1.54917	-1.13664	12.2991	0.00204827	0.0961089	1.01724
WBGene00011698	cyp-34A1	0.926934	0.75131	12.2767	0.00206391	0.0967456	1.01437
WBGene00014095	gdh-1	0.373295	11.0639	12.2665	0.00207109	0.0969853	1.01329
WBGene00007729	clec-185	-0.890784	0.409038	12.255	0.00207919	0.0972675	1.01203
WBGene00008563	F07H5.13	-0.531364	3.6222	12.2799	0.00208496	0.09744	1.01126
WBGene00200717	F11C1.15	-4.23708	-3.22017	12.2411	0.00208904	0.0975335	1.01085
WBGene00017717	F22F4.4	-0.623086	4.67765	14.7777	0.00209374	0.0976558	1.0103
WBGene00007513	wht-2	-0.437381	4.61731	12.2313	0.00209595	0.0976615	1.01028
WBGene00007835	oac-7	0.992335	1.39639	13.1863	0.00210432	0.0978366	1.0095
WBGene00008301	pals-39	1.02977	0.490305	12.2213	0.00210313	0.0978366	1.0095
WBGene00023401	ZK380.t2	-0.936959	0.709925	12.2173	0.00210597	0.0978366	1.0095
WBGene00044463	W09G12.10	-0.470557	3.75928	12.1977	0.00212002	0.0983918	1.00704
WBGene00021952	vha-19	-0.352575	9.21704	12.1775	0.00213469	0.0989748	1.00448
WBGene00002188	kgb-2	0.792614	1.53591	12.159	0.00214819	0.0994041	1.0026
WBGene00009400	F35C5.12	-0.882013	0.463871	12.1613	0.00214651	0.0994041	1.0026
WBGene00018286	F41E6.5	0.544811	3.31541	12.153	0.00215259	0.0995094	1.00214
WBGene00022760	ZK546.3	-1.01124	0.236707	12.1441	0.00215906	0.0997103	1.00126
WBGene00016415	ampd-1	-0.342813	8.03074	12.1342	0.00216637	0.0999493	1.00022
WBGene00015879	C17B7.5	1.06639	1.05123	13.2027	0.00217229	0.100026	0.999888
WBGene00045316	C49F5.9	-0.879983	0.331045	12.1289	0.00217033	0.100026	0.999888
WBGene00015527	C06E2.1	-0.531158	3.27141	12.1175	0.00217877	0.100169	0.999269
WBGene00019827	mop-25.1	-0.341166	6.6809	12.1163	0.00217967	0.100169	0.999269
WBGene00001767	gst-19	-1.25555	-0.0074631	12.2048	0.00218287	0.100217	0.999057
WBGene00003485	mua-6	-0.346139	7.99972	12.0658	0.00221755	0.10161	0.993062
WBGene00013355	gck-3	-0.312694	6.63953	12.0658	0.00221752	0.10161	0.993062
WBGene00007170	B0393.5	-0.418592	5.16551	12.0858	0.00222207	0.101619	0.993024
WBGene00009526	clec-169	0.720077	3.71036	14.4743	0.00222005	0.101619	0.993024
WBGene00001994	hpk-1	-0.374861	6.60126	12.0503	0.00222936	0.101853	0.992026
WBGene00018223	bath-13	1.07356	0.040378	12.0376	0.00223905	0.102196	0.990566
WBGene00086560	ZK355.8	3.0594	-2.37914	12.2084	0.00224731	0.102473	0.989389
WBGene00010510	ent-3	-1.31643	0.386388	13.2477	0.002265	0.10318	0.986405
WBGene00002058	ifd-2	-0.432159	5.49891	12.3437	0.0022838	0.103851	0.983589
WBGene00015626	C09B9.1	0.91783	0.330735	11.9793	0.00228417	0.103851	0.983589
WBGene00016006	fln-2	-0.550004	7.91321	14.0243	0.00231406	0.105018	0.978737
WBGene00017380	F11D5.1	-0.464772	5.68514	12.8658	0.00231431	0.105018	0.978737
WBGene00004509	rrf-2	0.628128	3.32582	12.7304	0.0023243	0.105226	0.977879
WBGene00015583	C08A9.3	4.13582	-3.12451	11.9269	0.00232562	0.105226	0.977879
WBGene00194855	Y75B8A.44	0.569449	2.11289	11.9313	0.00232207	0.105226	0.977879
WBGene00021167	cyp-32B1	0.778258	2.51803	12.8158	0.00233084	0.105288	0.977623
WBGene00219780	B0228.10	1.69396	0.247859	14.7466	0.00233149	0.105288	0.977623
WBGene00000216	asp-3	-0.472713	10.6003	12.4448	0.00234427	0.105763	0.975666
WBGene00007980	C36E8.1	-0.321057	7.9379	11.8944	0.00235176	0.10591	0.975064
WBGene00013147	eyg-1	-1.04515	0.041642	11.8931	0.00235281	0.10591	0.975064
WBGene00017962	fbxa-72	-0.400591	6.37798	11.9836	0.0023543	0.10591	0.975064
WBGene00003888	osm-8	-0.576668	4.72539	13.8749	0.00238085	0.106862	0.971176
WBGene00007068	cTel55X.1	-0.548371	5.42181	13.892	0.00237892	0.106862	0.971176
WBGene00018101	math-27	0.365136	4.9403	11.8568	0.00238231	0.106862	0.971176
WBGene00050939	C05G5.7	-0.423486	4.9525	11.8895	0.00240603	0.107823	0.967289
WBGene00001496	frm-10	0.342773	5.53518	11.8252	0.00240842	0.107827	0.967272
WBGene00009192	asah-2	0.403297	4.94605	11.8211	0.0024118	0.107875	0.967078
WBGene00006787	unc-52	-0.364764	9.89526	11.8134	0.00241825	0.107958	0.966746
WBGene00020953	W02G9.3	-0.380672	4.41459	11.8136	0.00241806	0.107958	0.966746
WBGene00004510	rrf-3	0.364025	4.90739	11.8069	0.00242364	0.107973	0.966686
WBGene00008829	cyp-35D1	-1.49849	2.29342	18.3944	0.0024255	0.107973	0.966686
WBGene00012618	dct-10	2.65985	-2.4235	11.8052	0.0024251	0.107973	0.966686
WBGene00022544	ZC190.10	1.90914	-1.74069	11.7923	0.00243586	0.108331	0.965247
WBGene00007983	C36E8.4	0.499062	3.76769	11.768	0.00245641	0.108996	0.962588
WBGene00013937	ZK218.3	5.80126	-3.20799	12.0883	0.0024578	0.108996	0.962588
WBGene00016115	mdt-26	-0.318771	5.54028	11.7713	0.00245358	0.108996	0.962588
WBGene00012540	Y37A1B.7	-0.55647	5.83379	14.1329	0.00246721	0.10931	0.961338
WBGene00016340	gba-2	0.836632	1.52969	11.9397	0.00249087	0.110207	0.957791
WBGene00021195	Y17G9A.2	1.08607	0.861598	12.5417	0.00249351	0.110207	0.957791
WBGene00021564	Y45G12B.3	-0.329407	5.52182	11.7234	0.0024945	0.110207	0.957791
WBGene00011960	oac-48	0.770264	1.12513	11.7194	0.00249802	0.110237	0.957671
WBGene00021354	fpn-1.1	-0.408956	4.91608	11.7172	0.00249989	0.110237	0.957671
WBGene00002804	let-630	-0.302502	6.94837	11.6932	0.00252075	0.111053	0.95447
WBGene00006504	kcc-1	-0.395852	7.7421	11.658	0.00255168	0.11231	0.949582
WBGene00007593	C14H10.3	-0.314138	7.03848	11.652	0.00255696	0.112402	0.949225
WBGene00017429	F13D11.4	-0.327825	6.29117	11.6502	0.00255857	0.112402	0.949225
WBGene00007401	C07A9.5	-2.30229	-2.31429	11.6473	0.00256115	0.11241	0.949195
WBGene00019510	K07H8.10	-0.354222	10.4907	11.6284	0.002578	0.113044	0.946753
WBGene00022709	ZK354.8	-1.09771	-0.239835	11.6026	0.00260114	0.113952	0.943279
WBGene00000425	ced-11	-0.588219	4.10303	12.9332	0.00263242	0.115129	0.938816
WBGene00009396	clec-65	-0.393283	5.73544	11.5677	0.00263292	0.115129	0.938816
WBGene00013947	ZK228.4	-1.39201	4.4021	21.3237	0.00263827	0.115255	0.938339
WBGene00001787	gst-39	-0.439232	3.67869	11.5489	0.00265015	0.115559	0.937197
WBGene00008610	F09C3.2	0.370699	4.22803	11.5504	0.00264878	0.115559	0.937197
WBGene00007758	C27A7.8	1.35103	-0.624481	11.545	0.00265378	0.115609	0.937007
WBGene00009084	F23B12.7	-0.310189	7.51362	11.53	0.00266773	0.116105	0.93515
WBGene00014135	ZK896.4	0.732281	1.5044	11.5274	0.0026701	0.116105	0.93515
WBGene00017843	F26G5.1	-5.74859	-3.61564	11.8296	0.00267726	0.116308	0.934389
WBGene00000229	atp-2	-0.362614	11.6918	11.5164	0.00268032	0.116333	0.934296
WBGene00008577	F08G2.5	-0.610824	2.73205	11.4993	0.00269633	0.11692	0.932111
WBGene00007844	irld-24	1.65614	-1.7035	11.4912	0.002704	0.117117	0.931379
WBGene00010742	K10D6.2	0.38747	6.16737	11.4892	0.00270588	0.117117	0.931379
WBGene00000065	act-3	-0.329978	8.15735	11.4297	0.00276269	0.119136	0.923956
WBGene00004014	phb-1	-0.335088	8.84767	11.4333	0.00275922	0.119136	0.923956
WBGene00004402	rom-3	-0.906579	0.441258	11.4316	0.00276083	0.119136	0.923956
WBGene00019525	K08D9.4	0.706911	1.49933	11.4319	0.00276051	0.119136	0.923956
WBGene00010397	suox-1	-0.333612	6.09818	11.42	0.00277204	0.11932	0.923287
WBGene00018283	sulp-3	-0.491006	3.36745	11.4201	0.00277195	0.11932	0.923287
WBGene00009640	nspc-10	-0.570596	4.15945	12.7035	0.00277911	0.119514	0.92258
WBGene00010004	F53H2.1	1.4554	-1.4536	11.3683	0.00282262	0.121163	0.91663
WBGene00020827	T26A8.4	-0.357481	5.48187	11.3692	0.00282178	0.121163	0.91663
WBGene00007303	rnh-1.3	1.42543	0.773071	13.7174	0.00282593	0.121194	0.916518
WBGene00011009	cyp-14A4	-1.88136	-0.490773	13.0085	0.00282982	0.121251	0.916316
WBGene00019597	K09H9.5	1.67005	2.65318	19.4601	0.00283862	0.121516	0.915365
WBGene00007192	B0491.5	-0.338644	8.07353	11.3445	0.00284628	0.121622	0.914988
WBGene00015400	cyp-35A2	-0.351984	6.15096	11.3457	0.00284505	0.121622	0.914988
WBGene00015676	mct-6	-0.414894	7.43007	11.6699	0.00285052	0.121692	0.914737
WBGene00017510	nhr-178	0.795899	1.00354	11.3191	0.00287174	0.122487	0.911911
WBGene00006981	zig-4	-0.504387	3.39641	11.3128	0.00287811	0.122535	0.911739
WBGene00012776	Y42A5A.1	0.477695	3.72132	11.3153	0.00287558	0.122535	0.911739
WBGene00017123	maoc-1	-0.355174	7.04628	11.3033	0.00288769	0.122832	0.91069
WBGene00003558	nca-2	0.614961	3.75257	12.5984	0.00289843	0.123177	0.909472
WBGene00007167	rbg-3	0.34597	5.24624	11.2848	0.00290651	0.123408	0.908656
WBGene00000063	act-1	-0.36127	9.3336	11.2779	0.00291362	0.123598	0.907987
WBGene00009304	eva-1	0.387203	5.00501	11.2704	0.00292123	0.123809	0.907249
WBGene00008998	ncs-4	0.453435	3.0731	11.2637	0.00292814	0.12399	0.906615
WBGene00044783	T26H5.10	2.61522	-2.33728	11.2486	0.00294375	0.124538	0.904698
WBGene00016565	C41D11.6	0.611866	1.64814	11.2356	0.00295728	0.124998	0.903098
WBGene00007692	cest-9.1	-0.384532	4.34861	11.2211	0.00297236	0.125522	0.90128
WBGene00020616	T20D4.10	0.512032	4.50902	12.1712	0.00299557	0.126388	0.898294
WBGene00017806	F26A1.8	1.02149	-0.383205	11.196	0.00299871	0.126407	0.898228
WBGene00012623	fbxa-149	0.733205	1.44444	11.1906	0.00300447	0.126536	0.897787
WBGene00016717	math-22	0.419778	3.51553	11.1767	0.00301926	0.127045	0.896044
WBGene00010034	F54B11.11	-1.17652	3.40688	17.3898	0.00302726	0.127267	0.895284
WBGene00045067	F07C6.6	-1.62968	-1.58263	11.1503	0.00304752	0.128004	0.892776
WBGene00022201	Y71H10B.1	-0.306551	7.09406	11.1377	0.00306103	0.128456	0.891245
WBGene00022022	txt-6	-0.398715	4.45858	11.1238	0.00307611	0.128974	0.889499
WBGene00010771	K11D2.5	-0.40884	4.45733	11.1192	0.00308113	0.129002	0.889402
WBGene00013001	noa-1	-0.325363	5.12815	11.1181	0.0030823	0.129002	0.889402
WBGene00003074	lars-2	-0.311011	6.03755	11.103	0.0030988	0.129551	0.887558
WBGene00017243	F08C6.5	-0.676791	1.33527	11.1011	0.00310094	0.129551	0.887558
WBGene00014253	ZK1320.3	-0.440017	6.03096	11.9156	0.00310804	0.129617	0.887339
WBGene00020394	T10B5.8	-0.819336	0.736796	11.0968	0.00310566	0.129617	0.887339
WBGene00013558	Y75B8A.25	-0.339824	5.04275	11.0866	0.00311685	0.129869	0.886495
WBGene00015435	C04E12.5	0.922732	2.03699	12.7078	0.00313011	0.130306	0.885037
WBGene00010503	K02C4.5	-0.346051	5.69471	11.0695	0.00313576	0.130425	0.88464
WBGene00050915	Y6E2A.10	2.22803	-2.20674	11.0651	0.00314061	0.130511	0.884354
WBGene00008123	ent-4	-0.354591	5.29546	11.0199	0.00319132	0.1325	0.877783
WBGene00220261	ZC434.10	-0.400484	3.98953	11.0167	0.00319502	0.132537	0.877663
WBGene00005059	sra-33	1.37258	-1.1177	10.9923	0.00322273	0.133568	0.874297
WBGene00013737	tpst-1	-0.366282	6.05741	10.9773	0.00323997	0.134164	0.872365
WBGene00003544	nas-25	0.946469	2.297	13.0969	0.00325585	0.134669	0.870731
WBGene00008615	F09C6.1	2.01469	-2.03877	10.9495	0.00327212	0.134669	0.870731
WBGene00013996	ZK550.2	0.636728	3.07637	11.6569	0.00326995	0.134669	0.870731
WBGene00016108	C25G6.3	-0.583558	3.39112	11.5341	0.00326965	0.134669	0.870731
WBGene00016418	hpo-27	-0.325722	6.03451	10.9517	0.00326955	0.134669	0.870731
WBGene00017659	F21C10.10	1.088	3.92988	17.2265	0.00327516	0.134669	0.870731
WBGene00017991	clec-180	-0.374952	7.94462	10.9474	0.00327458	0.134669	0.870731
WBGene00019146	H02F09.3	0.842081	2.80389	13.1612	0.00327157	0.134669	0.870731
WBGene00019579	oac-57	0.632982	1.91192	10.9425	0.00328035	0.134765	0.870424
WBGene00017823	pals-34	-1.48698	-1.539	10.929	0.00329612	0.135294	0.868722
WBGene00021886	Y54G2A.21	0.515615	2.29018	10.9248	0.00330105	0.135378	0.868452
WBGene00016763	C49A9.9	0.387893	4.64799	10.9203	0.00330626	0.135473	0.868147
WBGene00019187	H11E01.2	0.863265	1.18167	11.0102	0.00331135	0.135563	0.867859
WBGene00003619	nhr-20	0.424639	4.53683	10.9003	0.00332988	0.136203	0.865815
WBGene00007550	C13C4.6	0.722136	1.64838	10.8881	0.00334448	0.136468	0.864969
WBGene00012525	Y32B12C.1	0.798736	0.656027	10.891	0.00334097	0.136468	0.864969
WBGene00016298	fbxc-14	5.89954	-3.6831	11.165	0.00334802	0.136468	0.864969
WBGene00022813	ZK742.3	-0.610672	3.80359	12.2435	0.00334668	0.136468	0.864969
WBGene00006948	wrt-2	-0.511891	7.53235	12.5784	0.00335635	0.136689	0.864266
WBGene00012274	W05B5.1	-0.299662	6.5837	10.8552	0.00338386	0.137689	0.861099
WBGene00008451	cest-3	-0.420168	3.64188	10.8507	0.00338932	0.137792	0.860775
WBGene00022536	ZC178.2	3.75571	-3.1413	10.8449	0.00339642	0.137901	0.860433
WBGene00045272	F59C12.4	-0.524839	2.73538	10.8436	0.00339788	0.137901	0.860433
WBGene00021377	Y37E11B.5	-0.294987	5.4961	10.8263	0.00341901	0.138639	0.858116
WBGene00001726	grl-17	-2.15735	-2.44455	10.8237	0.00342216	0.138646	0.858092
WBGene00009504	F37B12.1	0.510577	3.77901	11.0979	0.00344134	0.139303	0.85604
WBGene00077684	Y26D4A.21	-1.83097	-1.74077	10.8021	0.00344868	0.13948	0.855489
WBGene00012978	Y48B6A.1	-0.297982	7.41643	10.7878	0.00346639	0.139954	0.854013
WBGene00018152	acs-4	-0.311059	7.50786	10.789	0.00346484	0.139954	0.854013
WBGene00012387	Y6B3B.1	-1.02975	0.891566	11.446	0.00348498	0.140584	0.852065
WBGene00014836	T09F5.12	0.400517	3.90698	10.7688	0.00349003	0.140666	0.85181
WBGene00003613	nhr-14	0.34244	5.37279	10.7638	0.00349627	0.140676	0.85178
WBGene00010266	dct-18	-0.479333	8.60896	11.8547	0.00349455	0.140676	0.85178
WBGene00008221	nhr-168	0.60972	3.1422	11.3343	0.00350407	0.140869	0.851185
WBGene00009812	suca-1	-0.312712	8.65277	10.7506	0.00351277	0.141004	0.85077
WBGene00010144	F56C4.1	0.738358	0.718409	10.7501	0.00351343	0.141004	0.85077
WBGene00016645	C44C1.6	1.14559	1.86334	13.7481	0.00352038	0.141124	0.850398
WBGene00020950	dlst-1	-0.322925	8.88297	10.7409	0.00352499	0.141124	0.850398
WBGene00021252	cht-4	-1.04854	4.16745	16.9273	0.00352849	0.141124	0.850398
WBGene00044107	F58G6.9	-0.618016	4.48458	13.0178	0.00352667	0.141124	0.850398
WBGene00018280	F41C6.7	-0.433811	3.32491	10.7346	0.00353299	0.141184	0.850215
WBGene00017092	E02C12.6	-0.743474	1.21053	10.7191	0.00355269	0.14185	0.84817
WBGene00044757	Y55F3BR.11	0.659206	1.15793	10.7026	0.00357375	0.14257	0.845973
WBGene00009864	F49B2.4	-5.10036	-3.24166	10.9671	0.00358235	0.14267	0.845667
WBGene00019388	K04F1.9	1.00049	0.43481	10.6973	0.00358055	0.14267	0.845667
WBGene00000789	cpz-2	-0.345048	8.34191	10.6878	0.00359276	0.142963	0.844776
WBGene00022028	Y65B4A.4	0.898513	0.367507	10.6698	0.00361606	0.143768	0.842336
WBGene00009952	acaa-2	-0.378745	8.62311	10.6654	0.00362178	0.143874	0.842019
WBGene00017349	farl-11	-0.316134	7.15203	10.6484	0.00364409	0.144638	0.839719
WBGene00020574	T19D7.6	-0.557345	2.61285	10.6429	0.0036512	0.144675	0.839605
WBGene00021004	sftb-2	-0.32138	7.37152	10.6429	0.00365122	0.144675	0.839605
WBGene00002084	ins-1	0.532175	2.69421	10.6322	0.00366535	0.144899	0.838936
WBGene00008298	C54D10.3	0.348665	6.4675	10.6293	0.00366922	0.144899	0.838936
WBGene00019164	H06H21.8	-0.333537	5.14945	10.6306	0.00366747	0.144899	0.838936
WBGene00044723	K11H12.11	0.611377	1.83831	10.6343	0.0036626	0.144899	0.838936
WBGene00008749	plpp-1.3	-0.328559	5.30687	10.6171	0.00368531	0.145289	0.837767
WBGene00010779	K11H3.2	1.94477	-2.23311	10.6182	0.00368378	0.145289	0.837767
WBGene00003002	lin-13	0.304741	6.56203	10.5972	0.00371183	0.146212	0.835018
WBGene00017490	pud-2.1	-1.5478	1.03747	13.3899	0.00372756	0.146708	0.833546
WBGene00007891	C33B4.2	0.657703	3.05441	11.53	0.00375903	0.147822	0.83026
WBGene00015761	C14C6.7	2.59222	-2.19541	10.5515	0.00377346	0.148154	0.829287
WBGene00020915	nol-58	-0.345844	9.28602	10.5513	0.00377377	0.148154	0.829287
WBGene00002234	kqt-2	-0.420438	3.82097	10.5447	0.00378273	0.148381	0.828621
WBGene00016093	srsx-34	1.34685	3.65575	17.9106	0.00379981	0.148926	0.827028
WBGene00022246	acp-7	0.567494	2.13553	10.5174	0.00382021	0.149601	0.825066
WBGene00008408	D2023.4	-0.361458	5.04631	10.511	0.00382907	0.149823	0.824422
WBGene00009201	F28C1.3	0.498655	6.11484	12.1725	0.00384609	0.150363	0.822858
WBGene00016526	fbxa-8	3.05812	-2.87644	10.4961	0.00384977	0.150382	0.822805
WBGene00010607	K06G5.3	-1.23895	-0.898251	10.4814	0.00387026	0.151056	0.820861
WBGene00000135	amt-3	0.50045	2.65022	10.4655	0.00389262	0.151803	0.818721
WBGene00010660	K08D8.6	0.984937	5.77225	17.3938	0.00390598	0.152197	0.817594
WBGene00012591	nspe-1	0.945676	4.58129	16.1774	0.00395192	0.153859	0.812877
WBGene00013477	Y69E1A.5	0.550018	5.2771	12.4518	0.00395575	0.15388	0.812817
WBGene00043993	T26G10.6	1.39129	-1.54923	10.4171	0.00396142	0.153973	0.812555
WBGene00007384	swt-3	1.09482	6.33202	18.1954	0.00396476	0.153975	0.812549
WBGene00009146	F26C11.1	-0.600786	2.34823	10.4003	0.00398557	0.154651	0.810648
WBGene00010982	flp-32	0.412421	3.31332	10.3981	0.00398875	0.154651	0.810648
WBGene00012607	Y38F1A.4	-0.866556	0.2421	10.3954	0.00399274	0.154677	0.810573
WBGene00013264	Y57A10A.24	-0.676716	1.40136	10.3754	0.00402178	0.155574	0.808063
WBGene00015953	C18B2.2	-0.812456	0.525137	10.3749	0.00402252	0.155574	0.808063
WBGene00195176	Y43F8B.24	0.823354	1.49409	10.6312	0.00403023	0.155744	0.807589
WBGene00007203	best-1	0.746306	2.54065	11.4258	0.00404723	0.155759	0.807548
WBGene00009429	irg-5	-1.75425	3.89653	19.188	0.0040382	0.155759	0.807548
WBGene00012324	rhy-1	-0.467173	3.74214	10.3609	0.0040431	0.155759	0.807548
WBGene00016528	C39B5.10	6.12261	-3.83155	10.942	0.0040453	0.155759	0.807548
WBGene00021407	Y38C1AB.5	-0.887008	0.134767	10.3636	0.00403906	0.155759	0.807548
WBGene00002979	lfe-2	-0.287428	6.08649	10.3358	0.00408014	0.156896	0.804388
WBGene00021647	Y47G6A.22	-0.301473	5.83687	10.3167	0.00410859	0.157861	0.801725
WBGene00007694	C23H4.6	0.802444	1.36146	10.3761	0.00412264	0.158271	0.800599
WBGene00001470	baz-2	0.397582	5.38677	10.5084	0.00414599	0.159037	0.798502
WBGene00008597	clec-55	1.53873	-1.50816	10.2858	0.00415501	0.159123	0.798268
WBGene00044353	ZK418.10	-1.53864	-1.32247	10.287	0.00415325	0.159123	0.798268
WBGene00013843	fbxa-49	1.28168	-1.21717	10.2566	0.00419955	0.160697	0.793992
WBGene00021425	ppgn-1	-0.29433	6.11735	10.2447	0.00421778	0.161263	0.792466
WBGene00010113	F55D12.5	-0.451826	4.72358	10.8443	0.00422449	0.161388	0.792128
WBGene00010993	vha-20	-0.313472	8.40801	10.2332	0.00423553	0.161678	0.79135
WBGene00017591	F19C7.1	-0.339313	7.80351	10.2256	0.00424734	0.161997	0.790493
WBGene00008450	E01G6.2	0.371693	3.80074	10.212	0.00426847	0.16267	0.788691
WBGene00019963	R08E5.3	-1.39461	5.93149	18.7926	0.00427374	0.162739	0.788509
WBGene00016111	C25H3.1	1.04567	-0.1215	10.197	0.00429203	0.16317	0.787359
WBGene00019933	R07C12.3	3.77038	-3.20099	10.1982	0.00429014	0.16317	0.787359
WBGene00015334	sup-18	0.509376	2.79464	10.1859	0.00430941	0.163566	0.786308
WBGene00020977	oac-52	0.883324	0.57244	10.1859	0.0043094	0.163566	0.786308
WBGene00000761	coq-1	-0.321162	5.70254	10.183	0.00431407	0.16361	0.78619
WBGene00018590	pdf-2	0.346669	4.4303	10.1693	0.00433562	0.164294	0.784377
WBGene00010032	F54B11.9	0.455399	3.78194	10.1618	0.00434768	0.164618	0.783522
WBGene00018510	F46F11.7	-0.351128	4.74076	10.1496	0.00436712	0.165221	0.781935
WBGene00000860	cwp-2	-5.65549	-3.55669	10.3899	0.00437692	0.165458	0.781312
WBGene00021073	nsun-1	-0.287623	7.72263	10.1337	0.00439268	0.165674	0.780745
WBGene00022378	Y94H6A.5	-0.290629	6.56828	10.1333	0.00439323	0.165674	0.780745
WBGene00044343	clec-77	2.36051	-2.60987	10.1361	0.00438879	0.165674	0.780745
WBGene00009038	F22B3.7	-6.18514	-3.82083	10.3701	0.00440752	0.166079	0.779685
WBGene00000980	dhs-17	0.40015	3.27226	10.1207	0.00441352	0.166172	0.779443
WBGene00000955	des-2	0.357582	4.11087	10.1084	0.00443355	0.166661	0.778165
WBGene00012136	T28F4.1	-0.362289	5.71123	10.104	0.00444075	0.166661	0.778165
WBGene00022797	best-24	0.367327	4.4791	10.1049	0.00443917	0.166661	0.778165
WBGene00044043	Y46G5A.38	-0.587066	2.80104	10.2408	0.00443948	0.166661	0.778165
WBGene00005602	srj-14	0.473075	2.81081	10.0882	0.00446652	0.167099	0.777026
WBGene00019211	H18N23.2	0.50577	6.5174	11.8739	0.00445777	0.167099	0.777026
WBGene00022628	ZC513.3	-1.02615	-0.383133	10.0881	0.00446667	0.167099	0.777026
WBGene00044737	ttr-45	0.37181	5.01638	10.0914	0.00446126	0.167099	0.777026
WBGene00011688	T10C6.6	-0.304184	5.77366	10.0677	0.00450026	0.168221	0.774119
WBGene00007957	C35C5.8	0.551572	2.2568	10.0467	0.0045352	0.169257	0.771452
WBGene00284847	F54D8.10	-1.75374	-0.586292	11.4915	0.00453304	0.169257	0.771452
WBGene00011936	pgrn-1	-0.348679	6.09769	10.044	0.00453972	0.169292	0.771365
WBGene00008987	F20G2.3	-0.341653	6.33803	10.0304	0.00456252	0.169908	0.769787
WBGene00013543	Y75B8A.6	-0.422949	4.80873	10.3928	0.00456349	0.169908	0.769787
WBGene00002137	inx-15	-0.328488	6.43747	10.0245	0.00457229	0.169965	0.76964
WBGene00022571	ZC239.13	1.76287	-2.12145	10.2666	0.00457096	0.169965	0.76964
WBGene00007650	ugt-23	-0.370075	6.07743	10.1039	0.00460374	0.170999	0.767007
WBGene00017635	F20D6.5	-0.517547	2.59238	9.99871	0.00461601	0.171318	0.766196
WBGene00013447	nars-2	-0.312703	4.74787	9.99417	0.00462374	0.17147	0.765813
WBGene00006971	zak-1	0.385984	4.02516	9.96797	0.00466862	0.172997	0.761961
WBGene00004096	pqm-1	-0.583858	5.29143	12.401	0.00468143	0.173022	0.761899
WBGene00006562	tdc-1	-0.580084	4.91213	12.184	0.00468424	0.173022	0.761899
WBGene00010068	F54F7.8	-0.797921	0.505534	9.96117	0.00468033	0.173022	0.761899
WBGene00013544	Y75B8A.7	-0.326127	6.1225	9.95746	0.00468675	0.173022	0.761899
WBGene00016484	C36C5.15	-2.27696	0.257197	14.4266	0.00468774	0.173022	0.761899
WBGene00009032	bgnt-1.3	-3.20522	-2.48877	10.3959	0.00472494	0.174258	0.758808
WBGene00016782	phat-3	0.647846	4.28454	12.2582	0.00475292	0.175152	0.756586
WBGene00001070	dpy-8	-0.51927	8.69367	11.5519	0.00475674	0.175155	0.756578
WBGene00019831	R02F2.1	-0.301412	7.82163	9.90341	0.00478126	0.17592	0.754685
WBGene00000369	ccf-1	-0.273955	6.27354	9.89495	0.00479625	0.175949	0.754614
WBGene00010475	K01F9.2	0.410981	3.52004	9.90024	0.00478687	0.175949	0.754614
WBGene00014755	F40F12.8	2.37249	-2.78944	9.89791	0.004791	0.175949	0.754614
WBGene00022019	sut-2	-0.282122	6.53122	9.89449	0.00479707	0.175949	0.754614
WBGene00021562	nuo-5	-0.294415	8.6725	9.89096	0.00480333	0.176041	0.754386
WBGene00003702	nhr-112	0.687743	1.7149	9.88814	0.00480835	0.176087	0.754273
WBGene00019986	R09F10.1	-0.30717	5.45746	9.88265	0.00481812	0.176307	0.75373
WBGene00009408	F35C12.3	-0.380145	4.43255	9.87875	0.00482508	0.176424	0.753442
WBGene00001425	fis-2	0.339813	4.50779	9.87648	0.00482914	0.176435	0.753415
WBGene00010063	dhrs-4	-0.460417	5.25583	10.8592	0.00483554	0.176531	0.753178
WBGene00302980	F53E2.2	-0.306621	8.41997	9.86683	0.00484642	0.176791	0.752541
WBGene00016719	math-24	0.490569	2.41816	9.86141	0.00485617	0.176871	0.752343
WBGene00219615	linc-109	-1.87506	-1.96366	9.86237	0.00485444	0.176871	0.752343
WBGene00021789	nol-6	-0.31267	6.08083	9.85427	0.00486902	0.177201	0.751533
WBGene00013311	sec-61.A	-0.312146	10.4098	9.83899	0.00489667	0.178069	0.749411
WBGene00004060	pmp-3	-0.300113	6.03981	9.83681	0.00490063	0.178075	0.749396
WBGene00014134	ZK896.3	0.57522	1.60233	9.83203	0.00490932	0.178253	0.748963
WBGene00003048	lit-1	-0.341281	7.71518	9.82811	0.00491647	0.178374	0.748668
WBGene00044339	nspc-4	-1.91122	2.9501	17.4433	0.00494231	0.179173	0.746727
WBGene00016810	C50D2.7	0.282743	5.51027	9.808	0.00495328	0.179432	0.7461
WBGene00015155	B0353.1	-0.34406	5.24145	9.8034	0.00496176	0.179601	0.745692
WBGene00003726	nhr-136	0.531847	3.56975	10.2716	0.00496768	0.179676	0.74551
WBGene00009467	F36D1.8	-2.35954	0.559213	15.1261	0.00499685	0.180321	0.743954
WBGene00011099	nhr-208	0.708428	0.881024	9.78538	0.00499508	0.180321	0.743954
WBGene00018380	decr-1.1	0.939101	0.431695	9.78431	0.00499705	0.180321	0.743954
WBGene00003936	pat-12	-0.345484	8.2789	9.75336	0.00505489	0.181709	0.740625
WBGene00007219	nlp-38	0.378045	4.29233	9.75625	0.00504946	0.181709	0.740625
WBGene00007413	pro-2	-0.294488	7.09152	9.75613	0.00504968	0.181709	0.740625
WBGene00007594	lgc-23	-0.695168	1.09178	9.75423	0.00505324	0.181709	0.740625
WBGene00021644	Y47G6A.18	-0.307999	6.37587	9.75432	0.00505307	0.181709	0.740625
WBGene00013698	Y106G6D.1	1.51878	-1.1334	9.74711	0.00506665	0.181992	0.739948
WBGene00006801	unc-68	0.34497	7.91651	9.73985	0.00508035	0.182088	0.739719
WBGene00015948	C18A11.2	0.536047	1.90737	9.74234	0.00507565	0.182088	0.739719
WBGene00020649	sma-10	0.510886	5.32925	11.3447	0.00508098	0.182088	0.739719
WBGene00007656	pals-2	2.77767	-2.08442	10.4542	0.00509897	0.182591	0.73852
WBGene00013902	ZC455.1	-0.431729	4.40466	9.93195	0.00510282	0.182591	0.73852
WBGene00007131	pals-26	1.23457	-0.506877	9.72254	0.00511319	0.182682	0.738303
WBGene00007761	rad-26	0.32745	5.55966	9.72051	0.00511705	0.182682	0.738303
WBGene00019127	cgt-3	-0.314679	6.70535	9.72209	0.00511405	0.182682	0.738303
WBGene00002270	lec-7	0.73699	0.864115	9.71738	0.00512303	0.182756	0.738127
WBGene00011449	T04H1.2	0.277583	5.744	9.70913	0.0051388	0.183041	0.737453
WBGene00019145	H02F09.2	1.32842	-1.30222	9.70915	0.00513876	0.183041	0.737453
WBGene00006943	wrm-1	0.383568	4.52006	9.70553	0.0051457	0.183075	0.737371
WBGene00013375	srsx-25	-1.94203	-1.41095	10.13	0.00514759	0.183075	0.737371
WBGene00000221	atf-4	-0.327021	6.88711	9.70166	0.00515312	0.183133	0.737233
WBGene00002043	hyl-1	-0.393404	5.65317	10.0437	0.00517135	0.183163	0.737161
WBGene00003242	mig-6	-0.312319	9.89309	9.6937	0.00516844	0.183163	0.737161
WBGene00009626	F42A8.1	0.413892	4.59611	9.88377	0.00515954	0.183163	0.737161
WBGene00013800	Y116A8C.23	-2.73894	-2.70594	9.69666	0.00516275	0.183163	0.737161
WBGene00018724	F53A9.1	-0.577579	2.07379	9.69107	0.00517351	0.183163	0.737161
WBGene00013078	ttr-25	0.350288	4.6333	9.68394	0.00518729	0.183513	0.736334
WBGene00007551	C13C4.7	0.585265	1.91117	9.67789	0.00519901	0.183788	0.735682
WBGene00010684	K08F9.1	0.750156	0.685227	9.67328	0.00520795	0.183966	0.735263
WBGene00006428	tkr-3	0.868135	0.743279	9.67021	0.00521392	0.184038	0.735093
WBGene00000996	dif-1	-0.313252	6.97306	9.66557	0.00522295	0.184218	0.734668
WBGene00000966	dhs-2	-0.357878	4.12428	9.65186	0.00524976	0.184363	0.734327
WBGene00010116	cest-13	-0.309052	4.70788	9.65121	0.00525104	0.184363	0.734327
WBGene00011424	dhs-31	0.960649	0.440549	9.67957	0.00525458	0.184363	0.734327
WBGene00016898	clik-2	-0.472428	7.43196	10.9569	0.0052378	0.184363	0.734327
WBGene00019275	rpac-40	-0.315636	5.86479	9.65591	0.00524182	0.184363	0.734327
WBGene00044602	C31B8.16	-5.73462	-3.57721	9.87717	0.00524981	0.184363	0.734327
WBGene00044708	pals-11	5.58811	-3.90338	9.87886	0.00524663	0.184363	0.734327
WBGene00007108	gspd-1	-0.290446	6.86668	9.63792	0.00527717	0.185017	0.732789
WBGene00000429	ceh-2	-0.819155	0.371916	9.63079	0.00529125	0.185372	0.731956
WBGene00016757	C49A9.3	0.329637	4.52898	9.62263	0.00530742	0.185799	0.730956
WBGene00019215	H20E11.3	0.601997	2.5632	9.72078	0.00531478	0.18587	0.73079
WBGene00019765	M03F8.6	0.511748	2.54158	9.61761	0.00531738	0.18587	0.73079
WBGene00044077	pacs-1	0.325402	5.7687	9.60508	0.00534236	0.186604	0.729078
WBGene00006669	twk-14	0.546322	2.19013	9.58609	0.00538047	0.187796	0.726314
WBGene00022010	catp-7	0.460201	6.95178	10.7959	0.00541108	0.188723	0.724174
WBGene00016475	srab-9	2.79918	-2.7987	9.5516	0.00545045	0.189955	0.721348
WBGene00000937	dbr-1	-0.319388	5.16391	9.54077	0.00547262	0.190586	0.719908
WBGene00022158	Y71G12B.23	-0.377205	4.04669	9.53595	0.00548252	0.190789	0.719446
WBGene00004825	skr-19	0.369752	4.43245	9.53358	0.0054874	0.190817	0.719382
WBGene00021322	Y34B4A.6	-0.386639	7.67412	9.81463	0.00550368	0.191242	0.718418
WBGene00005474	srh-268	1.88123	-2.12082	9.51961	0.00551625	0.191537	0.717748
WBGene00007826	C30H6.9	-0.341443	4.12308	9.51394	0.005528	0.191802	0.717146
WBGene00003400	dapk-1	-0.294696	6.97265	9.50507	0.00554645	0.1923	0.71602
WBGene00015396	nhr-148	0.69033	1.59674	9.50296	0.00555084	0.19231	0.715998
WBGene00014057	ZK673.1	-0.482179	4.0472	9.97336	0.0055666	0.192714	0.715088
WBGene00009357	F33C8.2	0.899245	-0.0718349	9.48757	0.00558305	0.19314	0.714127
WBGene00015481	C05D11.1	-0.275792	7.84234	9.47698	0.00560531	0.193768	0.712718
WBGene00018153	F37C12.10	0.838935	0.465863	9.4739	0.0056118	0.193849	0.712536
WBGene00014049	ZK666.11	5.67591	-3.96379	9.68921	0.00561706	0.193863	0.712504
WBGene00020242	phat-5	2.2272	3.13246	16.9591	0.00562049	0.193863	0.712504
WBGene00018422	F44E2.9	-0.337333	4.30998	9.44336	0.00567666	0.195657	0.708505
WBGene00017776	F25B5.5	-0.314773	5.5748	9.43398	0.00569677	0.196206	0.707288
WBGene00011437	smoc-1	0.503645	2.889	9.43081	0.00570355	0.196295	0.70709
WBGene00001666	gpa-4	0.567033	1.90188	9.42666	0.00571249	0.196315	0.707047
WBGene00006589	tnt-4	-0.708224	7.39038	13.278	0.00571222	0.196315	0.707047
WBGene00010303	cri-3	-0.313821	8.58904	9.4205	0.00572576	0.196626	0.706359
WBGene00189995	C06E7.88	1.30093	-1.3541	9.41324	0.00574146	0.197021	0.705487
WBGene00007404	best-5	0.726028	0.988606	9.40604	0.00575706	0.197315	0.70484
WBGene00015425	C04E6.11	-0.321152	5.80121	9.40347	0.00576265	0.197315	0.70484
WBGene00050904	Y70C5A.3	0.570411	2.68302	9.44872	0.00576026	0.197315	0.70484
WBGene00009518	clec-166	-0.383276	4.64481	9.39595	0.00577901	0.197586	0.704243
WBGene00010334	del-5	0.460302	2.8736	9.3977	0.0057752	0.197586	0.704243
WBGene00013181	Y53H1B.2	0.29719	5.30499	9.39297	0.0057855	0.197664	0.704072
WBGene00007053	chd-7	0.321758	7.4089	9.38067	0.00581243	0.19844	0.702371
WBGene00008040	ttr-5	0.397673	3.70798	9.37497	0.00582496	0.198723	0.701753
WBGene00004747	sdc-3	0.333793	4.7688	9.37016	0.00583554	0.198939	0.70128
WBGene00018646	mul-1	0.658938	2.26173	9.63917	0.00586357	0.199749	0.699515
WBGene00006886	vap-1	0.319978	5.58952	9.35474	0.00586962	0.19981	0.699382
WBGene00013622	clec-238	-1.20189	1.53157	11.9358	0.0058788	0.199977	0.69902
WBGene00020701	T22F7.1	-0.396731	4.39372	9.34728	0.00588621	0.200084	0.698788
WBGene00015433	C04E12.2	0.372888	3.47319	9.34071	0.00590083	0.200436	0.698025
WBGene00012727	Y39G8B.7	-1.69385	0.374982	11.8371	0.00591099	0.200635	0.697592
WBGene00017726	F22H10.2	1.02126	0.440003	9.68945	0.00592893	0.201099	0.69659
WBGene00012058	T26F2.2	1.46447	0.582675	11.6701	0.00593919	0.201301	0.696154
WBGene00009187	F27D4.1	-0.417277	8.34188	9.89092	0.00595616	0.20173	0.695229
WBGene00002348	myo-1	-0.713121	8.67727	12.9212	0.00597886	0.202131	0.694367
WBGene00009345	F32H2.8	1.24652	-1.35094	9.30508	0.00598092	0.202131	0.694367
WBGene00043980	F11D5.7	0.782928	1.26424	9.39052	0.00598086	0.202131	0.694367
WBGene00019612	gpcp-1	0.292498	4.93437	9.30218	0.0059875	0.202207	0.694203
WBGene00009485	F36G9.3	0.882884	1.62074	10.2283	0.00600231	0.202562	0.693443
WBGene00020511	immt-1	-0.286188	7.6402	9.27691	0.00604509	0.203859	0.690671
WBGene00007765	C27B7.9	1.40319	-0.939972	9.36218	0.00605427	0.204021	0.690324
WBGene00019959	R08E3.3	-0.306012	5.07823	9.26945	0.00606221	0.204125	0.690103
WBGene00044719	clec-172	-1.24592	0.231465	10.2453	0.00606606	0.204125	0.690103
WBGene00000412	cdr-1	-0.694268	1.81152	9.3698	0.00609043	0.204798	0.688673
WBGene00004225	ptr-11	-0.339687	7.02592	9.24109	0.00612778	0.205907	0.68633
WBGene00004749	sdn-1	0.312905	6.48567	9.23786	0.00613528	0.205954	0.68623
WBGene00010296	dgat-2	-0.393244	4.35113	9.23399	0.00614431	0.205954	0.68623
WBGene00022159	mppa-1	-0.278047	6.6026	9.23437	0.00614343	0.205954	0.68623
WBGene00045411	C25F9.11	1.52504	3.40446	15.6313	0.00614676	0.205954	0.68623
WBGene00003099	lys-10	-1.64579	1.3141	12.9919	0.00616943	0.206566	0.684942
WBGene00000088	aex-5	0.296237	4.77337	9.21897	0.00617948	0.206754	0.684545
WBGene00010774	K11E4.2	-0.438618	3.06686	9.21164	0.00619671	0.207183	0.683645
WBGene00008477	clec-17	1.34454	4.14821	15.673	0.00622931	0.208125	0.681676
WBGene00000684	col-110	-0.576838	2.31773	9.19362	0.00623931	0.20831	0.681289
WBGene00008799	F14E5.1	-0.551611	2.08218	9.19043	0.00624688	0.208415	0.681072
WBGene00004197	prx-12	-0.341421	4.19004	9.1469	0.00635126	0.211596	0.674493
WBGene00219688	linc-21	-1.44661	-1.41789	9.14824	0.006348	0.211596	0.674493
WBGene00195168	T13C5.9	-0.693061	1.03307	9.14307	0.00636054	0.211754	0.674167
WBGene00013136	tmem-189	-0.293592	5.35143	9.14117	0.00636515	0.211758	0.674161
WBGene00010972	R01H10.4	-0.423927	3.52191	9.13567	0.00637849	0.212036	0.67359
WBGene00219905	F19F10.13	3.81386	-3.38328	9.13399	0.00638257	0.212036	0.67359
WBGene00010945	chil-13	0.42244	3.14825	9.10961	0.00644221	0.213714	0.670166
WBGene00013748	ssu-1	-0.810926	0.633659	9.11071	0.00643951	0.213714	0.670166
WBGene00019493	catp-5	-0.345019	5.50994	9.10643	0.00645002	0.213822	0.669947
WBGene00050906	F20E11.17	3.76411	-3.46942	9.08843	0.00649452	0.215145	0.667268
WBGene00006667	twk-12	0.437422	3.56002	9.08242	0.00650945	0.215335	0.666885
WBGene00008780	hxk-1	0.454546	5.89283	10.2774	0.00650631	0.215335	0.666885
WBGene00007316	nlp-41	0.538704	2.65676	9.07833	0.00651961	0.215441	0.666671
WBGene00012451	Y17D7B.3	1.18803	-0.478226	9.07744	0.00652183	0.215441	0.666671
WBGene00001035	dnj-17	-0.294939	5.42217	9.06601	0.00655039	0.216232	0.66508
WBGene00016134	C26B9.5	-0.306829	6.78254	9.06335	0.00655705	0.2163	0.664944
WBGene00015622	C09B8.3	-0.491684	2.91521	9.06129	0.00656222	0.216318	0.664908
WBGene00017275	F08F8.10	0.29844	4.64697	9.05724	0.00657239	0.216501	0.664541
WBGene00004810	skr-4	0.432127	3.47933	9.04992	0.00659081	0.216955	0.66363
WBGene00007405	C07A9.9	-0.354561	4.7864	9.04643	0.00659962	0.217093	0.663355
WBGene00006986	zip-1	0.306277	4.68557	9.03704	0.00662337	0.217569	0.662403
WBGene00022722	tomm-70	-0.265611	7.07973	9.03834	0.00662008	0.217569	0.662403
WBGene00017327	F10C1.8	-0.392867	3.29829	9.03086	0.00663905	0.217931	0.661681
WBGene00011261	nphp-4	0.491611	2.50994	9.02534	0.00665312	0.21824	0.661066
WBGene00003965	pdk-1	-0.369915	4.47191	9.02148	0.00666296	0.218257	0.661031
WBGene00013841	fbxa-33	-0.697492	1.3116	9.02239	0.00666064	0.218257	0.661031
WBGene00018706	F52F10.2	-0.466511	5.14685	10.1152	0.00667554	0.218517	0.660516
WBGene00009804	F47B8.3	0.429122	3.66139	9.01088	0.00669005	0.218839	0.659875
WBGene00303233	D1014.13	2.30567	-2.23526	9.00636	0.00670165	0.219066	0.659426
WBGene00044344	mrpl-39	-0.278776	5.75087	8.9996	0.00671904	0.219481	0.658603
WBGene00022156	Y71G12B.18	1.60999	-0.360531	9.91443	0.00673621	0.219888	0.657798
WBGene00195165	F57G4.11	2.8473	-2.84864	8.97923	0.00677173	0.220894	0.655816
WBGene00000490	che-11	0.461909	2.8785	8.97689	0.00677782	0.220939	0.655728
WBGene00022176	Y71H2AM.11	-0.297947	7.02261	8.97258	0.00678903	0.221151	0.655312
WBGene00009582	slcr-46.3	-0.301058	4.7485	8.96935	0.00679746	0.221265	0.655088
WBGene00018732	F53A9.9	0.411606	2.9962	8.96762	0.00680197	0.221265	0.655088
WBGene00016142	mrps-18C	-0.271793	6.98935	8.96103	0.00681921	0.221672	0.65429
WBGene00000671	col-96	1.33644	-1.30491	8.95856	0.00682566	0.221727	0.654181
WBGene00017432	F13H6.4	-0.735681	2.11467	9.65931	0.0068501	0.222367	0.652929
WBGene00000552	cmd-1	-0.29325	9.17113	8.93847	0.00687855	0.222982	0.65173
WBGene00000776	cpl-1	-0.64136	9.80661	11.6434	0.0068741	0.222982	0.65173
WBGene00000970	dhs-6	-0.307662	6.61376	8.93173	0.0068964	0.223389	0.650939
WBGene00015381	C03B1.13	-0.3619	3.71108	8.93013	0.00690063	0.223389	0.650939
WBGene00012127	T28D6.7	-0.311421	5.6021	8.92558	0.00691271	0.223471	0.650778
WBGene00015139	B0310.3	0.639454	2.9697	9.82054	0.00690947	0.223471	0.650778
WBGene00011094	R07B7.10	-0.338982	3.74629	8.91376	0.00694422	0.223937	0.649874
WBGene00012886	Y45F10D.6	1.5448	-0.596548	9.8067	0.00693816	0.223937	0.649874
WBGene00019698	riok-1	-0.284051	6.16189	8.91573	0.00693896	0.223937	0.649874
WBGene00022721	ugtp-1	0.326072	4.11265	8.913	0.00694623	0.223937	0.649874
WBGene00009899	efl-3	-0.302113	5.76748	8.90014	0.00698069	0.224585	0.64862
WBGene00017160	F01F1.3	0.57463	2.45798	8.90089	0.00697867	0.224585	0.64862
WBGene00020912	W01A11.7	0.744252	1.05724	8.90106	0.00697822	0.224585	0.64862
WBGene00002163	ist-1	-0.34426	4.98676	8.88801	0.00701336	0.225326	0.647188
WBGene00044607	K02A11.4	0.452525	2.74524	8.88848	0.00701209	0.225326	0.647188
WBGene00011607	T08D2.2	0.815389	0.468493	8.88495	0.00702164	0.225438	0.646973
WBGene00015615	fbxc-48	5.15244	-3.83205	9.07278	0.00703796	0.225807	0.646262
WBGene00000516	cki-1	0.339471	4.20866	8.87316	0.00705361	0.226155	0.645595
WBGene00011539	fbxa-135	0.906063	-0.022308	8.86607	0.00707289	0.226618	0.644706
WBGene00012035	T26C5.5	0.649612	0.938881	8.85575	0.00710108	0.227366	0.643275
WBGene00007290	C04B4.2	-4.98281	-3.72456	9.03407	0.00713975	0.227772	0.642499
WBGene00011894	ttr-23	1.09638	2.62885	12.2614	0.00714337	0.227772	0.642499
WBGene00016029	elf-1	-0.765908	3.85435	11.6349	0.00712423	0.227772	0.642499
WBGene00018068	F35H10.2	0.6186	1.12587	8.84204	0.00713873	0.227772	0.642499
WBGene00021661	mbtr-1	-0.43931	2.88847	8.84891	0.00711986	0.227772	0.642499
WBGene00021980	glb-32	0.513024	2.34409	8.83875	0.0071478	0.227772	0.642499
WBGene00045433	F49D11.10	-0.280601	5.68385	8.84166	0.0071398	0.227772	0.642499
WBGene00003580	ndx-3	-0.358286	4.48541	8.83204	0.00716634	0.228208	0.641669
WBGene00021507	Y41D4A.5	-0.268311	6.74125	8.82886	0.00717516	0.228334	0.64143
WBGene00011100	nhr-209	0.491912	2.66799	8.82436	0.00718761	0.228575	0.640972
WBGene00013807	Y116A8C.30	-0.305917	4.76003	8.81543	0.00721246	0.229152	0.639876
WBGene00206514	R05G9.5	0.945548	-0.200036	8.81432	0.00721555	0.229152	0.639876
WBGene00005582	sri-70	-2.25695	-2.18549	8.80783	0.00723364	0.229571	0.639082
WBGene00010803	M01B2.10	0.472481	2.61966	8.80094	0.00725295	0.230028	0.638219
WBGene00001137	eat-6	-0.313611	10.5868	8.79649	0.00726542	0.230268	0.637766
WBGene00015378	C03B1.7	-0.373397	3.68499	8.79382	0.00727293	0.23035	0.637611
WBGene00007385	atp-5	-0.325756	9.58063	8.78607	0.00729475	0.230419	0.637482
WBGene00018108	F36H5.10	2.61951	-2.92204	8.79098	0.00728091	0.230419	0.637482
WBGene00020943	W02D7.8	1.2237	-1.24555	8.78758	0.0072905	0.230419	0.637482
WBGene00022765	ZK546.14	-0.302171	7.4528	8.78625	0.00729423	0.230419	0.637482
WBGene00000514	ckb-4	-0.293436	4.67268	8.76022	0.00736807	0.232578	0.633432
WBGene00022512	dot-1.5	5.9127	-3.79422	8.93225	0.00741542	0.233915	0.630942
WBGene00012469	Y17G7B.18	-0.329804	4.33705	8.73851	0.00743028	0.234226	0.630364
WBGene00005472	srh-266	3.57203	-3.30156	8.72451	0.00747072	0.234424	0.629999
WBGene00008633	fbxa-18	1.1253	-0.775562	8.7225	0.00747655	0.234424	0.629999
WBGene00010127	F55G11.7	-1.3556	-1.61784	8.72681	0.00746406	0.234424	0.629999
WBGene00012185	W01F3.2	1.39126	2.85952	13.7455	0.00747156	0.234424	0.629999
WBGene00012716	Y39E4B.5	0.603668	1.11703	8.72676	0.0074642	0.234424	0.629999
WBGene00012911	acl-7	-0.299712	5.93756	8.73338	0.00744507	0.234424	0.629999
WBGene00016020	sptl-1	-0.280151	7.62851	8.7328	0.00744675	0.234424	0.629999
WBGene00021157	Y4C6B.3	0.564817	2.45303	8.72519	0.00746876	0.234424	0.629999
WBGene00013872	ZC374.2	-0.34991	4.95979	8.72025	0.00748307	0.234471	0.62991
WBGene00000906	daf-10	0.551849	2.04035	8.71158	0.00750828	0.235064	0.628814
WBGene00077783	D1054.18	2.05781	-2.32981	8.7103	0.00751201	0.235064	0.628814
WBGene00020357	T08E11.1	1.66005	-1.6974	8.70082	0.00753967	0.235772	0.627508
WBGene00010437	cox-11	-0.282698	4.80952	8.69909	0.00754474	0.235773	0.627506
WBGene00010015	atad-3	-0.278886	7.67314	8.69576	0.00755449	0.23592	0.627234
WBGene00022504	mam-1	-0.592745	4.8307	10.9142	0.00756252	0.236014	0.627062
WBGene00016929	C54F6.12	1.62748	-1.74522	8.68721	0.00757962	0.236076	0.626948
WBGene00018354	F42G2.5	0.712689	0.529214	8.68825	0.00757657	0.236076	0.626948
WBGene00044637	rft-1	-0.416048	3.25996	8.68995	0.00757156	0.236076	0.626948
WBGene00000169	aqp-1	0.330554	5.68505	8.67735	0.0076087	0.236456	0.626249
WBGene00001462	flp-19	0.286457	4.65654	8.67921	0.00760319	0.236456	0.626249
WBGene00013514	Y73F4A.1	-0.382242	4.07832	8.67623	0.00761199	0.236456	0.626249
WBGene00017720	F22F7.2	-0.610894	2.51755	8.97193	0.00760537	0.236456	0.626249
WBGene00219315	F07E5.12	3.92417	-3.46226	8.85349	0.00763682	0.23707	0.625123
WBGene00000863	cya-1	0.360412	4.10558	8.6491	0.00769271	0.238489	0.622531
WBGene00021817	Y53G8B.1	-0.391402	3.30721	8.64969	0.00769094	0.238489	0.622531
WBGene00003130	map-2	-0.268185	7.33565	8.64046	0.00771859	0.239133	0.62136
WBGene00001444	flp-1	0.273024	6.2382	8.63604	0.00773189	0.239292	0.621072
WBGene00021828	Y54E10A.6	-0.294333	5.16954	8.63537	0.00773391	0.239292	0.621072
WBGene00013284	daf-22	-0.32478	8.0889	8.63277	0.00774174	0.239376	0.620919
WBGene00018932	mrpl-2	-0.281682	5.4287	8.62905	0.00775295	0.239565	0.620577
WBGene00016073	C24H12.4	-0.264362	6.94873	8.6246	0.0077664	0.239822	0.620111
WBGene00001463	flp-20	0.442675	2.60824	8.62004	0.00778018	0.240089	0.619627
WBGene00010942	chch-3	-0.295347	6.74577	8.61249	0.00780309	0.240322	0.619207
WBGene00019718	M01H9.2	-0.84396	1.53344	9.35478	0.00779751	0.240322	0.619207
WBGene00271786	F58H7.11	-3.91007	-3.35258	8.61406	0.00779832	0.240322	0.619207
WBGene00020661	smz-2	-1.21829	-0.88313	8.59784	0.00784777	0.241539	0.617012
WBGene00009477	rbpl-1	-0.332794	7.08058	8.59419	0.00785895	0.241652	0.61681
WBGene00022738	fubl-2	-0.264256	7.55445	8.59328	0.00786174	0.241652	0.61681
WBGene00000766	coq-6	-0.274648	5.70419	8.59158	0.00786695	0.241654	0.616807
WBGene00015077	B0238.13	1.14085	0.628868	9.6134	0.00787861	0.241747	0.616639
WBGene00022866	ZK1240.1	1.20289	-0.685982	8.58723	0.0078803	0.241747	0.616639
WBGene00012778	Y42A5A.3	1.0895	0.688108	9.47325	0.00789717	0.24208	0.616041
WBGene00015824	C16B8.4	0.365028	3.55665	8.57925	0.00790485	0.24208	0.616041
WBGene00021784	cogc-4	-0.265164	6.62726	8.57866	0.00790666	0.24208	0.616041
WBGene00007881	nlp-35	0.404069	2.88481	8.57573	0.00791572	0.242199	0.615827
WBGene00005478	srh-272	5.173	-3.89272	8.75131	0.00793512	0.242635	0.615047
WBGene00004373	rme-1	-0.291537	8.06399	8.56368	0.00795302	0.243023	0.614352
WBGene00009734	F45G2.8	-0.34182	5.15828	8.55786	0.00797111	0.243418	0.613648
WBGene00013980	dos-1	-0.655239	1.44981	8.54526	0.00801041	0.244458	0.611795
WBGene00015537	C06E4.8	1.09497	-0.742381	8.53316	0.00804838	0.245457	0.610024
WBGene00016659	C45B2.2	-0.987783	6.1534	13.8504	0.00806733	0.245716	0.609567
WBGene00021635	Y47G6A.5	0.400006	5.185	9.01432	0.00806515	0.245716	0.609567
WBGene00004049	parp-1	-0.321306	4.5433	8.51854	0.00809453	0.245745	0.609514
WBGene00006547	tbx-11	-2.03904	-1.86834	8.52301	0.00808038	0.245745	0.609514
WBGene00009915	F52A8.1	-0.279431	7.00997	8.52152	0.0080851	0.245745	0.609514
WBGene00016114	flp-27	0.34136	3.83283	8.52003	0.00808981	0.245745	0.609514
WBGene00020601	T20B12.3	-0.259052	5.937	8.5206	0.008088	0.245745	0.609514
WBGene00022236	Y73B6BL.12	-1.08703	0.139777	9.01097	0.00812227	0.246428	0.60831
WBGene00011796	T16G1.2	-0.33547	5.14511	8.49898	0.00815669	0.247312	0.606754
WBGene00174936	21ur-8714	-1.7869	-2.30796	8.48426	0.00820382	0.248581	0.604533
WBGene00003638	nhr-48	0.578055	5.76519	10.8823	0.00821655	0.248805	0.60414
WBGene00001362	exc-1	-0.412307	2.93209	8.47815	0.0082235	0.248855	0.604054
WBGene00022353	pals-18	-0.435987	3.20301	8.47207	0.00824311	0.249288	0.603299
WBGene00005867	srw-120	5.49475	-4.11655	8.63598	0.00828754	0.250419	0.601332
WBGene00013801	Y116A8C.24	4.96363	-3.7632	8.63453	0.0082921	0.250419	0.601332
WBGene00015814	oatr-1	-0.28733	8.02489	8.45558	0.00829656	0.250419	0.601332
WBGene00008841	F15A4.6	0.703654	5.3059	11.7758	0.00831647	0.250856	0.600576
WBGene00045488	F57B1.9	0.651061	1.00491	8.44785	0.00832173	0.250856	0.600576
WBGene00017959	ugt-42	0.961487	1.647	9.92679	0.00833789	0.251172	0.600028
WBGene00044697	poml-4	1.07804	1.74864	10.5059	0.00834294	0.251172	0.600028
WBGene00009836	fbxa-185	2.2254	-1.44545	9.18877	0.0083867	0.252202	0.598251
WBGene00011933	oac-47	1.2273	-1.20667	8.42767	0.0083879	0.252202	0.598251
WBGene00010453	fozi-1	-0.297736	5.69874	8.42085	0.00841039	0.252554	0.597646
WBGene00023405	sor-1	-0.270022	5.47976	8.4215	0.00840825	0.252554	0.597646
WBGene00017692	F22B7.1	-0.597657	3.47738	9.50196	0.00843337	0.253082	0.596739
WBGene00000050	acr-11	-0.561555	1.50001	8.40209	0.00847258	0.25394	0.595269
WBGene00000971	dhs-7	-0.842728	1.07188	8.74547	0.00847304	0.25394	0.595269
WBGene00018027	F35A5.5	-0.915179	1.38678	9.38688	0.00847821	0.25394	0.595269
WBGene00001046	dnj-28	0.449788	2.29571	8.39821	0.00848551	0.253955	0.595244
WBGene00020188	T03F1.6	0.805564	1.14724	8.62448	0.00848953	0.253955	0.595244
WBGene00012118	grsp-2	0.318299	5.25456	8.39465	0.0084974	0.254028	0.595119
WBGene00015928	C17H12.2	0.317907	5.06749	8.37589	0.00856032	0.255746	0.592192
WBGene00013035	Y49E10.16	-0.272564	5.77938	8.37143	0.00857536	0.255869	0.591982
WBGene00016639	C44B12.6	-0.901993	-0.16471	8.37266	0.00857121	0.255869	0.591982
WBGene00010905	mrps-34	-0.276379	5.87731	8.36741	0.00858894	0.25606	0.591658
WBGene00010998	R03G8.3	0.38234	2.99105	8.3663	0.00859269	0.25606	0.591658
WBGene00010801	M01B2.8	1.01421	0.355541	8.68434	0.00860091	0.256142	0.591519
WBGene00016539	madd-2	0.271402	5.3288	8.36012	0.00861361	0.256357	0.591154
WBGene00007242	madf-5	-0.295457	5.29603	8.35688	0.00862462	0.256522	0.590875
WBGene00022736	ZK418.7	0.471899	2.72593	8.35192	0.00864148	0.256698	0.590577
WBGene00044686	flp-28	0.306923	4.65212	8.35324	0.00863699	0.256698	0.590577
WBGene00008769	mrpl-13	-0.292396	5.38742	8.34893	0.00865166	0.256838	0.590341
WBGene00011718	T11G6.3	0.338821	3.95776	8.34577	0.00866243	0.256995	0.590076
WBGene00270319	F26A1.19	0.454328	2.15338	8.33413	0.00870224	0.258012	0.588359
WBGene00022060	dmd-9	-0.46471	2.87374	8.33018	0.00871581	0.258251	0.587957
WBGene00000262	bra-1	0.427114	2.61646	8.32677	0.00872755	0.25836	0.587775
WBGene00001187	egl-19	0.361453	6.45678	8.63582	0.00873601	0.25836	0.587775
WBGene00007557	C14A4.6	-0.324991	4.25226	8.32437	0.00873578	0.25836	0.587775
WBGene00012543	nkcc-1	-0.326627	6.02392	8.32177	0.00874477	0.258456	0.587613
WBGene00015876	C17B7.2	0.635302	1.39092	8.31629	0.00876368	0.258852	0.586949
WBGene00007228	acs-7	-0.337723	6.52842	8.38907	0.00877065	0.258894	0.586878
WBGene00009643	F42G4.6	-2.31976	0.219093	12.2992	0.00878492	0.259017	0.586672
WBGene00013574	lron-13	-0.578618	1.42707	8.30988	0.00878586	0.259017	0.586672
WBGene00077762	Y57G11C.499	3.27291	-2.99497	8.30184	0.0088138	0.259677	0.585566
WBGene00008388	D1086.1	0.929937	-0.107074	8.28618	0.00886846	0.261124	0.583154
WBGene00012316	ctps-1	-0.304132	7.40878	8.28334	0.0088784	0.261252	0.58294
WBGene00043066	acr-25	-0.618371	2.35566	8.5672	0.00891933	0.262292	0.581215
WBGene00000207	asb-2	-0.324468	9.85039	8.26959	0.00892675	0.262346	0.581126
WBGene00003640	nhr-50	0.384204	3.23621	8.25749	0.00896956	0.262616	0.580679
WBGene00008292	C54C8.4	-0.696913	3.6358	10.2425	0.0089462	0.262616	0.580679
WBGene00008850	F15B9.6	0.933713	-0.0601633	8.26148	0.00895543	0.262616	0.580679
WBGene00009023	F21G4.1	0.35417	4.00192	8.26112	0.00895671	0.262616	0.580679
WBGene00010094	tsfm-1	-0.276139	6.47687	8.25864	0.00896548	0.262616	0.580679
WBGene00017048	D2021.4	-0.437109	3.5879	8.25793	0.00896801	0.262616	0.580679
WBGene00009515	clec-170	-0.308962	4.69332	8.25218	0.00898841	0.262887	0.580231
WBGene00044044	C08B6.14	-4.12727	-3.7594	8.25173	0.00899004	0.262887	0.580231
WBGene00013534	acr-24	0.413314	2.62906	8.24645	0.00900881	0.263272	0.579596
WBGene00010644	K07G5.5	-0.324684	4.02778	8.24218	0.00902404	0.263552	0.579133
WBGene00007297	C04F12.1	0.398291	4.17521	8.29085	0.00903036	0.263573	0.579099
WBGene00011286	ttr-29	0.537459	1.86161	8.23239	0.00905907	0.264246	0.577991
WBGene00021639	Y47G6A.13	-0.861321	-0.153258	8.23081	0.00906476	0.264248	0.577988
WBGene00013267	Y57A10A.27	-0.26519	5.76655	8.22495	0.00908581	0.264697	0.577251
WBGene00020021	R12B2.7	3.63309	-3.35781	8.20677	0.00915148	0.266154	0.574868
WBGene00022076	daao-1	-0.46586	3.41335	8.28104	0.00915285	0.266154	0.574868
WBGene00045078	C46C2.7	0.345884	3.37713	8.20922	0.00914257	0.266154	0.574868
WBGene00009888	F49E2.5	-0.306754	9.6549	8.18957	0.00921407	0.267768	0.572242
WBGene00019813	ger-1	0.266877	5.07115	8.18397	0.00923458	0.268198	0.571545
WBGene00008726	F13A7.11	0.645032	1.6905	8.17848	0.00925471	0.268616	0.570869
WBGene00002696	let-504	-0.31204	5.80882	8.17371	0.00927222	0.268773	0.570615
WBGene00010399	clec-13	3.32426	-3.09668	8.17505	0.00926732	0.268773	0.570615
WBGene00012573	Y37H2C.1	0.831149	1.14669	8.56635	0.00927732	0.268773	0.570615
WBGene00011407	ppat-1	-0.334882	3.81008	8.16663	0.00929833	0.269215	0.569901
WBGene00007367	nhr-150	0.705588	1.83164	8.52722	0.00933285	0.269715	0.569095
WBGene00012462	Y17G7B.8	0.520888	4.01249	9.09751	0.0093306	0.269715	0.569095
WBGene00013602	Y87G2A.16	-0.899301	1.28545	8.9187	0.00933023	0.269715	0.569095
WBGene00011850	T20B3.1	-0.39596	5.08299	8.61622	0.00935411	0.270163	0.568375
WBGene00000075	adm-4	-0.341841	4.23625	8.14981	0.00936066	0.270185	0.568338
WBGene00010627	nol-56	-0.288347	9.33208	8.12282	0.00946162	0.272842	0.56409
WBGene00018237	irg-7	-0.291811	9.40725	8.1221	0.00946433	0.272842	0.56409
WBGene00001700	grd-11	0.953387	2.38354	10.3054	0.00947633	0.272852	0.564073
WBGene00010336	acox-1.6	-0.291069	5.99715	8.119	0.00947601	0.272852	0.564073
WBGene00010092	F55C5.2	1.97418	-2.53416	8.11473	0.0094921	0.273138	0.563617
WBGene00015202	B0478.3	-0.657069	1.49508	8.11054	0.00950797	0.273259	0.563425
WBGene00015877	C17B7.3	1.2055	-0.871863	8.11057	0.00950783	0.273259	0.563425
WBGene00011428	nlp-80	0.312033	5.20172	8.108	0.00951756	0.273367	0.563253
WBGene00003011	lin-25	0.294176	4.80248	8.10093	0.0095444	0.273971	0.562296
WBGene00013545	Y75B8A.8	-0.265344	5.87806	8.09593	0.00956339	0.274348	0.561699
WBGene00007392	fbxa-156	0.455639	2.45317	8.094	0.00957075	0.274391	0.561631
WBGene00007461	C08F11.14	-4.85124	-3.72397	8.25092	0.00959717	0.27498	0.560699
WBGene00002130	inx-8	-0.667042	1.25776	8.084	0.00960894	0.275012	0.560649
WBGene00021464	ugt-31	0.659355	3.43463	9.46769	0.00961002	0.275012	0.560649
WBGene00001597	gld-3	0.357688	3.40543	8.07134	0.00965754	0.276203	0.558771
WBGene00017417	F13B6.2	0.405218	3.06864	8.06773	0.00967147	0.276433	0.55841
WBGene00012796	Y43F4A.1	-0.310295	6.09844	8.06581	0.00967885	0.276475	0.558343
WBGene00004393	rnt-1	0.564577	1.96588	8.06408	0.00968553	0.276498	0.558308
WBGene00021605	Y46H3C.5	-0.835655	0.146177	8.0624	0.00969204	0.276515	0.558281
WBGene00001152	ech-3	-0.344478	3.78456	8.04794	0.0097481	0.277945	0.556041
WBGene00086568	Y2H9A.6	0.989285	-0.466058	8.0426	0.0097689	0.278369	0.555379
WBGene00001479	fmo-4	-0.904554	8.59753	12.3859	0.00978393	0.278534	0.555122
WBGene00011041	R05H5.7	-0.884912	0.400837	8.03807	0.00978657	0.278534	0.555122
WBGene00003129	map-1	-0.285134	5.84497	8.02652	0.00983182	0.279367	0.553824
WBGene00003649	nhr-59	0.482345	1.90298	8.02628	0.00983275	0.279367	0.553824
WBGene00014003	ZK593.3	-0.786959	4.99137	11.6421	0.00983373	0.279367	0.553824
WBGene00003743	nlp-5	0.57796	1.25915	8.02295	0.00984584	0.279542	0.553553
WBGene00011870	T20G5.8	0.358295	4.47257	8.01832	0.00986407	0.27989	0.553013
WBGene00004206	pst-1	-0.284259	5.86844	8.00985	0.00989751	0.280669	0.551806
WBGene00020710	T23B3.2	0.363316	3.62708	8.0081	0.00990444	0.280696	0.551764
WBGene00000984	dhs-21	0.341988	4.85937	8.00198	0.00992868	0.281213	0.550965
WBGene00006621	try-3	-0.696939	0.95986	7.99827	0.00994343	0.28146	0.550583
WBGene00000929	dao-3	-0.424794	6.10503	8.96683	0.00995016	0.281481	0.550551
WBGene00235340	C45G7.13	-0.370251	3.60807	7.99262	0.00996595	0.281758	0.550124
WBGene00017332	ugt-37	-1.05673	2.8287	11.0244	0.0099747	0.281835	0.550005
WBGene00005652	srr-1	-0.412742	3.56441	7.98627	0.00999129	0.282107	0.549586
WBGene00014078	ZK792.5	-0.254604	6.66574	7.985	0.00999638	0.282107	0.549586
WBGene00019224	gnrr-5	0.467284	2.20651	7.98038	0.0100148	0.282458	0.549045
WBGene00006570	tig-2	0.386732	3.96628	7.97647	0.0100306	0.282731	0.548626
WBGene00001892	his-18	-0.822385	0.409425	7.97277	0.0100454	0.282874	0.548408
WBGene00004698	rsp-1	-0.274866	7.36587	7.97221	0.0100477	0.282874	0.548408
WBGene00001765	gst-17	-1.43294	-1.12586	8.14859	0.0100704	0.283172	0.54795
WBGene00014697	cyp-25A3	-0.613234	4.05229	9.64057	0.0100701	0.283172	0.54795
WBGene00021734	Y50C1A.2	0.763322	0.461461	7.96222	0.010088	0.283497	0.547452
WBGene00007082	acs-10	-2.37177	-2.49017	7.94577	0.0101546	0.284622	0.545731
WBGene00013266	Y57A10A.26	0.385971	5.42969	8.43573	0.010157	0.284622	0.545731
WBGene00015059	B0228.1	0.760491	3.19194	9.86015	0.0101419	0.284622	0.545731
WBGene00044207	Y6G8.5	1.64518	-1.74917	7.94843	0.0101438	0.284622	0.545731
WBGene00194713	F19B10.13	-1.00217	0.141131	8.20407	0.0101584	0.284622	0.545731
WBGene00019391	irld-11	1.13112	-1.08204	7.94052	0.010176	0.284947	0.545236
WBGene00005022	sqv-4	-0.266539	6.34493	7.93733	0.0101891	0.285142	0.54494
WBGene00022321	fbxa-25	5.41215	-3.83132	8.08391	0.0102359	0.286281	0.543208
WBGene00018674	F52C9.3	-0.267804	5.96555	7.8941	0.0103674	0.289786	0.537922
WBGene00000987	dhs-24	-0.251681	6.22003	7.88887	0.0103892	0.2899	0.537753
WBGene00009700	lurp-1	-0.463409	2.27859	7.88868	0.01039	0.2899	0.537753
WBGene00013074	hmit-1.2	-1.60406	3.43992	12.9057	0.0103819	0.2899	0.537753
WBGene00007252	mlt-2	-0.311694	4.14934	7.8725	0.0104578	0.291618	0.535186
WBGene00018164	sup-36	0.312706	4.1933	7.868	0.0104767	0.291972	0.534659
WBGene00016773	oac-10	-3.33828	-3.40128	7.86342	0.010496	0.292336	0.534118
WBGene00012073	cpd-2	0.381656	3.4125	7.85515	0.010531	0.293102	0.532982
WBGene00017786	F25E5.5	0.379989	3.37469	7.85305	0.0105399	0.293102	0.532982
WBGene00022281	abtm-1	-0.301994	5.453	7.85249	0.0105423	0.293102	0.532982
WBGene00017468	F14F9.5	-0.395397	2.76676	7.85026	0.0105518	0.293192	0.532848
WBGene00008432	D2085.7	0.429074	2.52064	7.84597	0.01057	0.293524	0.532356
WBGene00003797	npp-11	-0.257563	6.30301	7.84199	0.0105869	0.293757	0.532011
WBGene00015133	mrpl-11	-0.265165	6.31591	7.84022	0.0105945	0.293757	0.532011
WBGene00018778	F53H1.4	-0.254739	6.50699	7.83906	0.0105994	0.293757	0.532011
WBGene00022351	Y82E9BR.19	-0.342275	3.80843	7.83812	0.0106035	0.293757	0.532011
WBGene00000931	dao-5	-0.267271	8.69557	7.83586	0.0106131	0.293824	0.531913
WBGene00044761	pals-19	-0.430315	2.72072	7.83462	0.0106184	0.293824	0.531913
WBGene00005644	srp-3	0.418221	2.56775	7.83142	0.0106321	0.29403	0.531608
WBGene00003722	nhr-132	0.371361	3.34118	7.82687	0.0106516	0.29428	0.53124
WBGene00206505	B0250.18	-1.52838	-1.93335	7.82639	0.0106537	0.29428	0.53124
WBGene00004310	ras-1	-0.270165	4.85365	7.81807	0.0106895	0.295037	0.530124
WBGene00007094	B0019.2	0.331105	3.86208	7.81366	0.0107085	0.295037	0.530124
WBGene00008761	F13E9.12	0.698063	0.443548	7.81353	0.0107091	0.295037	0.530124
WBGene00009386	tag-290	1.12911	2.82648	11.137	0.0107103	0.295037	0.530124
WBGene00018939	fbxa-190	0.493007	2.50586	7.81271	0.0107126	0.295037	0.530124
WBGene00002249	lap-1	-0.323444	7.02337	7.8274	0.0107237	0.295169	0.529929
WBGene00011464	T05B9.1	-0.295946	4.43077	7.80698	0.0107374	0.295372	0.529631
WBGene00001461	flp-18	0.277184	5.94644	7.79874	0.0107731	0.295554	0.529363
WBGene00018523	lact-1	0.372056	3.31995	7.79819	0.0107755	0.295554	0.529363
WBGene00019951	R08C7.8	-2.69501	-2.67233	7.80248	0.0107569	0.295554	0.529363
WBGene00020156	T02B11.4	-0.753453	4.13721	10.5184	0.0107552	0.295554	0.529363
WBGene00021847	Y54F10AL.1	-0.255133	5.8173	7.7996	0.0107694	0.295554	0.529363
WBGene00013852	hhat-1	-0.402789	6.30019	8.57844	0.010795	0.295744	0.529084
WBGene00018172	F38B6.2	-0.644847	3.0061	8.82989	0.0107893	0.295744	0.529084
WBGene00206393	W04G5.16	3.66968	-3.48553	7.78829	0.0108187	0.296218	0.528389
WBGene00001922	his-48	-0.582751	1.05136	7.77872	0.0108605	0.297191	0.526965
WBGene00019849	oac-40	-0.781843	-0.00353864	7.77328	0.0108844	0.297497	0.526518
WBGene00020043	R13A1.5	0.531846	1.70252	7.77433	0.0108798	0.297497	0.526518
WBGene00022350	Y82E9BR.18	-0.257929	5.85864	7.77156	0.010892	0.297529	0.52647
WBGene00017983	F32D1.3	0.478415	3.11769	7.84621	0.0109012	0.297608	0.526355
WBGene00007919	cup-16	0.590885	2.25385	7.93094	0.0109079	0.297617	0.526342
WBGene00018729	F53A9.6	-0.396982	3.74536	7.76632	0.010915	0.297639	0.52631
WBGene00008018	tbc-8	0.377751	3.65921	7.75764	0.0109534	0.298512	0.525039
WBGene00008375	D1054.8	-0.765225	4.94074	11.0936	0.0109637	0.298619	0.524883
WBGene00001065	dpy-3	-0.466233	8.00964	8.97593	0.0109732	0.298705	0.524757
WBGene00013318	Y57G11C.23	-3.61848	-3.21318	7.74954	0.0109893	0.298969	0.524373
WBGene00010693	K08H2.7	0.862574	-0.361076	7.74792	0.0109965	0.298991	0.524342
WBGene00016505	ttr-33	0.519022	4.36002	8.90401	0.0110331	0.299545	0.523538
WBGene00018488	acs-1	-0.269868	7.58064	7.73982	0.0110326	0.299545	0.523538
WBGene00077770	M04D5.3	-0.380022	3.39835	7.73905	0.011036	0.299545	0.523538
WBGene00000066	act-4	-0.309285	11.3598	7.72957	0.0110784	0.299754	0.523235
WBGene00001905	his-31	-0.704294	0.910979	7.72896	0.0110812	0.299754	0.523235
WBGene00003779	nob-1	0.427042	2.48677	7.72875	0.0110821	0.299754	0.523235
WBGene00008014	fbxa-172	2.14244	-2.16998	7.73214	0.0110669	0.299754	0.523235
WBGene00012936	pola-1	-0.259741	6.1169	7.72937	0.0110793	0.299754	0.523235
WBGene00016218	pals-23	0.561518	4.04573	9.00337	0.0110726	0.299754	0.523235
WBGene00000787	cps-6	-0.285265	6.00785	7.72679	0.0110909	0.299819	0.523141
WBGene00008632	fbxa-88	0.831368	-0.344059	7.71914	0.0111253	0.300576	0.522045
WBGene00003862	old-1	0.610876	2.27605	7.97914	0.0111333	0.300617	0.521986
WBGene00006647	tsr-1	-0.276953	5.16597	7.709	0.0111711	0.301291	0.521013
WBGene00044712	F22G12.8	0.599863	0.97959	7.7094	0.0111693	0.301291	0.521013
WBGene00020062	nhr-270	0.550573	2.62114	7.90039	0.0111866	0.301536	0.52066
WBGene00009865	F49B2.6	-0.562942	4.01225	8.97375	0.0112075	0.301578	0.5206
WBGene00021517	Y41D4B.15	1.33228	-1.7288	7.70127	0.0112061	0.301578	0.5206
WBGene00219583	anr-43	-3.13214	-3.45619	7.70111	0.0112068	0.301578	0.5206
WBGene00017388	F11G11.13	-1.11335	-1.13173	7.69673	0.0112268	0.301925	0.520101
WBGene00007900	C33D9.6	0.416575	3.55061	7.68494	0.0112805	0.303197	0.518276
WBGene00004346	rgs-3	0.385146	2.94134	7.67141	0.0113426	0.304691	0.51614
WBGene00016558	pks-1	-0.553453	1.82549	7.66494	0.0113724	0.305316	0.51525
WBGene00005228	srh-2	1.14009	-0.630743	7.66234	0.0113844	0.305464	0.51504
WBGene00023066	F53F10.7	3.98204	-3.71239	7.65922	0.0113988	0.305676	0.514739
WBGene00013435	Y66D12A.9	-0.272297	6.11585	7.65237	0.0114306	0.305774	0.514599
WBGene00014089	ZK822.1	-0.730175	0.816598	7.65582	0.0114146	0.305774	0.514599
WBGene00016157	ari-1.2	0.291826	4.56667	7.65376	0.0114242	0.305774	0.514599
WBGene00017663	F21D12.3	0.357288	5.39329	7.90625	0.0114417	0.305774	0.514599
WBGene00017765	gcst-1	-0.250221	7.44447	7.65118	0.0114361	0.305774	0.514599
WBGene00077521	maf-1	-0.392285	3.1454	7.65361	0.0114248	0.305774	0.514599
WBGene00011417	T04A11.2	0.823571	-0.328172	7.63324	0.0115198	0.307687	0.511891
WBGene00006610	tre-4	-0.311343	3.99846	7.6318	0.0115265	0.307692	0.511884
WBGene00000242	bbs-2	0.605546	1.77819	7.62284	0.0115686	0.308463	0.510797
WBGene00044389	C27D6.12	0.398003	2.62255	7.624	0.0115632	0.308463	0.510797
WBGene00004875	smd-1	-0.318849	7.78352	7.61876	0.0115878	0.308624	0.51057
WBGene00015188	B0432.7	-0.338272	3.95536	7.61901	0.0115866	0.308624	0.51057
WBGene00006467	magu-2	0.277476	5.34766	7.61424	0.0116091	0.308805	0.510316
WBGene00009831	F47G9.4	0.301575	4.47045	7.61313	0.0116144	0.308805	0.510316
WBGene00013300	lgc-7	-1.46144	-1.65068	7.6137	0.0116117	0.308805	0.510316
WBGene00005432	srh-222	2.63111	-2.95939	7.60182	0.0116679	0.310054	0.508563
WBGene00197129	T01G1.5	5.63613	-3.90676	7.74549	0.0116813	0.310232	0.508313
WBGene00001604	gln-3	-0.457675	8.50852	8.69351	0.0116882	0.31024	0.508302
WBGene00016216	pals-22	0.372353	2.99512	7.58752	0.0117361	0.311335	0.506772
WBGene00044348	Y71G12B.31	0.743865	0.575324	7.57478	0.0117972	0.312778	0.504763
WBGene00018229	F40C5.2	-2.11908	-0.825159	9.4765	0.0118108	0.312962	0.504509
WBGene00005980	srx-89	5.30489	-4.03983	7.70904	0.0118501	0.313704	0.50348
WBGene00007129	B0272.3	-0.485558	6.94867	9.06212	0.0118521	0.313704	0.50348
WBGene00011284	ttr-27	0.419017	3.67523	7.60306	0.0118717	0.314044	0.50301
WBGene00000373	cyp-14A5	0.869648	5.30223	11.4272	0.0118995	0.314601	0.50224
WBGene00000697	col-123	-1.20979	-1.32613	7.54485	0.011942	0.31537	0.501179
WBGene00303364	Y14H12A.5	0.928826	-0.151509	7.54546	0.011939	0.31537	0.501179
WBGene00002116	ins-33	0.369657	3.89028	7.5424	0.011954	0.315508	0.50099
WBGene00010282	F58G11.4	0.573606	1.24517	7.53802	0.0119753	0.315717	0.500702
WBGene00011420	T04A11.5	0.795081	-0.279412	7.53879	0.0119716	0.315717	0.500702
WBGene00011032	ddx-52	-0.256848	6.23946	7.5358	0.0119862	0.315787	0.500606
WBGene00016287	C31H1.2	-2.09954	-2.78487	7.53472	0.0119915	0.315787	0.500606
WBGene00007363	stdh-1	0.320268	3.97063	7.52692	0.0120297	0.316278	0.499931
WBGene00009815	F47B10.4	-5.41639	-4.27023	7.85307	0.0120303	0.316278	0.499931
WBGene00011335	T01E8.8	0.429876	2.51577	7.52679	0.0120304	0.316278	0.499931
WBGene00008013	C38D9.5	1.35953	-1.65785	7.52009	0.0120633	0.316611	0.499474
WBGene00008979	slc-25A18.1	-0.261365	6.05023	7.52232	0.0120524	0.316611	0.499474
WBGene00022815	asic-1	0.423218	2.71632	7.52038	0.0120619	0.316611	0.499474
WBGene00004391	rnr-1	-0.268534	6.94109	7.51849	0.0120712	0.316642	0.499431
WBGene00008341	ttr-44	-0.47131	5.46064	8.77453	0.0120826	0.316763	0.499266
WBGene00009013	mrps-33	-0.305737	5.45094	7.51297	0.0120985	0.316844	0.499154
WBGene00011494	T05F1.9	0.513959	1.8366	7.51206	0.012103	0.316844	0.499154
WBGene00015709	cyp-33A1	-0.314287	4.31041	7.50872	0.0121195	0.316844	0.499154
WBGene00021187	Y9D1A.2	-1.77116	0.228321	9.92231	0.0121146	0.316844	0.499154
WBGene00022704	ZK353.9	0.333984	3.88579	7.50995	0.0121134	0.316844	0.499154
WBGene00020207	T04B8.5	-0.262509	6.91869	7.49699	0.0121778	0.31819	0.497314
WBGene00009560	psa-3	-0.467116	2.0596	7.48595	0.0122329	0.319452	0.495594
WBGene00017796	F25G6.1	0.398268	3.71419	7.47929	0.0122663	0.320146	0.494652
WBGene00015064	B0228.7	-0.268813	6.38054	7.47783	0.0122736	0.320159	0.494635
WBGene00019763	galt-1	0.461646	2.72016	7.47526	0.0122865	0.320318	0.494419
WBGene00007927	C34C12.8	-0.270716	6.53253	7.47036	0.0123112	0.320426	0.494273
WBGene00017075	nap-1	-0.26714	9.58707	7.47048	0.0123106	0.320426	0.494273
WBGene00020887	hic-1	0.330661	3.70766	7.47091	0.0123084	0.320426	0.494273
WBGene00001329	epn-1	-0.265371	7.33018	7.46885	0.0123188	0.320446	0.494245
WBGene00007904	C33G3.4	-0.287242	4.76847	7.46186	0.0123541	0.321134	0.493314
WBGene00011097	nhr-206	0.601659	1.02486	7.46091	0.0123589	0.321134	0.493314
WBGene00021400	Y38C1AA.9	0.660447	2.50614	8.19035	0.0123816	0.321546	0.492757
WBGene00010673	K08E7.5	-0.557912	6.65263	9.54689	0.0124193	0.322344	0.49168
WBGene00022793	ZK686.3	-0.268521	7.8677	7.44759	0.0124265	0.322354	0.491667
WBGene00008973	flwr-1	-0.243742	5.92318	7.44527	0.0124384	0.322483	0.491494
WBGene00017755	zip-8	-1.0857	2.44108	10.109	0.0124579	0.32281	0.491054
WBGene00017038	dmsr-4	0.51079	1.49862	7.43513	0.0124902	0.323415	0.49024
WBGene00020014	R11G11.6	-0.758406	3.5746	9.60871	0.012495	0.323415	0.49024
WBGene00010160	png-1	-0.257453	5.58542	7.42975	0.0125178	0.323826	0.489688
WBGene00006418	spl-2	-0.882548	2.48706	9.24202	0.0125344	0.32403	0.489414
WBGene00018265	nhr-182	0.330782	3.59215	7.42552	0.0125395	0.32403	0.489414
WBGene00009816	F47B10.5	-0.417553	2.92171	7.41339	0.0126021	0.325109	0.487971
WBGene00012830	mrps-28	-0.333575	4.21916	7.41455	0.0125961	0.325109	0.487971
WBGene00018036	F35C8.5	-0.404477	5.18254	8.0645	0.0125978	0.325109	0.487971
WBGene00015760	C14C6.6	2.607	-2.23998	7.41646	0.0126256	0.325536	0.487401
WBGene00000549	cls-2	-0.248433	6.21733	7.40117	0.0126655	0.326066	0.486694
WBGene00009361	F33E2.5	0.449544	2.31443	7.40182	0.0126621	0.326066	0.486694
WBGene00016848	klo-1	-0.263268	5.14547	7.40088	0.012667	0.326066	0.486694
WBGene00016906	C53D5.5	-0.309777	5.70123	7.39748	0.0126847	0.326342	0.486327
WBGene00005487	srh-282	3.0537	-3.01891	7.39591	0.0126929	0.326374	0.486284
WBGene00001476	fmo-1	-0.51119	5.47406	8.98983	0.0127131	0.326567	0.486027
WBGene00013151	nsun-5	-0.277299	4.95208	7.3918	0.0127144	0.326567	0.486027
WBGene00002053	ifb-1	-0.288611	8.81377	7.38567	0.0127464	0.327212	0.485171
WBGene00002915	let-805	-0.341993	8.75679	7.4935	0.0128233	0.328645	0.483272
WBGene00013212	Y54G11A.1	0.35618	3.59596	7.37268	0.0128147	0.328645	0.483272
WBGene00019886	R05D8.9	-0.791257	0.35878	7.37191	0.0128187	0.328645	0.483272
WBGene00194869	K01A6.8	0.862937	-0.403095	7.36835	0.0128375	0.32883	0.483029
WBGene00013766	prmt-1	-0.276219	8.91116	7.35205	0.0129239	0.330862	0.480354
WBGene00005893	srx-2	-0.78067	-0.127565	7.34459	0.0129637	0.331603	0.479381
WBGene00021527	aakg-3	0.524711	3.21936	7.84053	0.012967	0.331603	0.479381
WBGene00002037	hum-4	-0.272107	7.30967	7.33596	0.0130098	0.332517	0.478186
WBGene00001976	hmg-11	0.252101	6.07798	7.32988	0.0130425	0.332806	0.477809
WBGene00002021	hsp-17	0.269657	5.5885	7.32301	0.0130795	0.332806	0.477809
WBGene00006602	tps-1	0.360287	5.89818	7.75173	0.0130715	0.332806	0.477809
WBGene00006942	wrk-1	-0.272211	6.04459	7.32233	0.0130831	0.332806	0.477809
WBGene00008640	F10B5.3	-1.12158	0.876544	8.6224	0.0130579	0.332806	0.477809
WBGene00011679	ucr-2.2	-0.296083	7.89294	7.32197	0.013085	0.332806	0.477809
WBGene00015152	B0348.2	1.38106	0.970478	9.62834	0.0130566	0.332806	0.477809
WBGene00015440	arrd-20	1.08494	2.29829	9.86361	0.0130287	0.332806	0.477809
WBGene00022654	ZK105.3	-2.19387	-2.9041	7.3235	0.0130768	0.332806	0.477809
WBGene00004370	rig-3	-0.330782	5.16951	7.36678	0.0130951	0.33288	0.477712
WBGene00012766	Y41E3.8	0.383249	3.95088	7.31744	0.0131095	0.332976	0.477586
WBGene00022160	Y71G12B.25	-0.56741	7.21746	9.42575	0.0131131	0.332976	0.477586
WBGene00004000	pgp-6	-1.34413	5.95389	11.7322	0.0131315	0.333085	0.477445
WBGene00016712	C46E10.8	4.91333	-4.03606	7.4512	0.0131257	0.333085	0.477445
WBGene00005866	srw-119	5.52134	-4.08203	7.44646	0.0131505	0.333387	0.477052
WBGene00000117	alh-11	-0.281087	5.50952	7.30232	0.0131915	0.334245	0.475935
WBGene00007658	pals-4	2.57413	-2.9384	7.30037	0.0132022	0.334333	0.47582
WBGene00005967	srx-76	2.53139	-3.0027	7.2958	0.0132271	0.334422	0.475705
WBGene00008100	C44H9.5	0.513363	4.52896	8.55089	0.0132201	0.334422	0.475705
WBGene00015404	nstp-4	-0.258439	5.98935	7.29591	0.0132265	0.334422	0.475705
WBGene00003181	med-2	-2.01774	-2.58852	7.28885	0.0132651	0.335203	0.474693
WBGene00012728	Y39G8B.9	-1.00096	5.19247	11.3242	0.0132874	0.335264	0.474613
WBGene00018650	F49F1.10	-5.59405	-3.81704	7.48741	0.0132841	0.335264	0.474613
WBGene00021565	Y45G12C.1	-0.43157	2.89069	7.28449	0.013289	0.335264	0.474613
WBGene00019029	F58B6.1	0.657367	0.826004	7.27927	0.0133177	0.335807	0.47391
WBGene00012496	Y24F12A.1	0.292339	4.3145	7.27746	0.0133276	0.335878	0.473819
WBGene00002100	ins-17	0.325496	3.65493	7.27187	0.0133584	0.336135	0.473487
WBGene00009778	F46C5.1	1.19163	0.953917	8.7862	0.0133593	0.336135	0.473487
WBGene00010277	F58G6.7	-0.302961	4.72745	7.27238	0.0133556	0.336135	0.473487
WBGene00020626	T20F5.4	-0.511982	4.14674	8.28367	0.0133791	0.336451	0.473078
WBGene00006627	tsp-1	0.9276	-0.0471333	7.25917	0.0134287	0.337518	0.471703
WBGene00008017	fbxa-176	1.25789	-1.64016	7.25439	0.0134553	0.337735	0.471424
WBGene00009514	F37H8.5	-0.349214	6.74925	7.59725	0.0134578	0.337735	0.471424
WBGene00022196	gpa-17	-0.257906	5.35311	7.25373	0.013459	0.337735	0.471424
WBGene00001403	fbl-1	-0.307523	5.23151	7.25208	0.0134681	0.337784	0.47136
WBGene00021118	clec-125	1.35055	-0.612555	7.83603	0.0134958	0.338117	0.470933
WBGene00021994	Y59E9AL.4	0.724834	2.87814	8.59871	0.013492	0.338117	0.470933
WBGene00003794	npp-8	-0.287916	6.3436	7.23329	0.0135732	0.33915	0.469608
WBGene00007007	mak-2	-0.237297	6.33055	7.2358	0.0135592	0.33915	0.469608
WBGene00008089	C44C10.9	0.300419	5.42193	7.23387	0.01357	0.33915	0.469608
WBGene00015245	B0524.6	-0.280546	5.12498	7.23408	0.0135689	0.33915	0.469608
WBGene00017927	F29C4.4	-4.97729	-4.22773	7.36881	0.0135652	0.33915	0.469608
WBGene00003960	pcs-1	0.278143	4.44074	7.22784	0.0136039	0.339374	0.469321
WBGene00007599	C15A11.7	0.584025	3.64247	8.36468	0.013598	0.339374	0.469321
WBGene00016403	grsp-3	0.596781	1.71872	7.22934	0.0135955	0.339374	0.469321
WBGene00009450	ugt-58	-0.303382	6.72083	7.22551	0.013617	0.339521	0.469134
WBGene00011017	R04F11.5	-0.272918	4.46307	7.21785	0.0136603	0.340418	0.467987
WBGene00013354	snx-6	-0.244265	6.38876	7.21502	0.0136764	0.340615	0.467737
WBGene00020134	T01B6.1	-0.428137	3.86111	7.48436	0.0136846	0.340615	0.467737
WBGene00044357	nspc-6	-1.88786	-2.16836	7.21261	0.01369	0.340615	0.467737
WBGene00020443	esyt-2	-0.257079	5.67619	7.21022	0.0137036	0.340771	0.467537
WBGene00003607	nhr-8	-0.412828	4.77089	7.82967	0.0137406	0.341511	0.466595
WBGene00010143	F56A12.2	0.594011	1.18458	7.19834	0.0137712	0.341822	0.466199
WBGene00015101	rpia-1	-0.242005	6.14084	7.19768	0.013775	0.341822	0.466199
WBGene00018356	islo-1	0.383335	3.73595	7.19987	0.0137625	0.341822	0.466199
WBGene00009558	F39B2.8	0.313662	4.34725	7.19082	0.0138143	0.342185	0.465739
WBGene00009809	F47B8.8	0.459638	2.41577	7.19002	0.0138188	0.342185	0.465739
WBGene00021212	Y18H1A.8	-0.849656	0.971358	7.55813	0.0138037	0.342185	0.465739
WBGene00219551	K07F5.21	-5.1969	-4.22813	7.32503	0.0138055	0.342185	0.465739
WBGene00001458	flp-15	0.311857	4.07149	7.18188	0.0138655	0.342973	0.46474
WBGene00003559	ncl-1	-0.307527	6.24934	7.19421	0.0138653	0.342973	0.46474
WBGene00020333	sre-12	1.81926	-2.62708	7.18066	0.0138726	0.342973	0.46474
WBGene00007854	C31H5.1	0.889405	-0.64124	7.16966	0.013936	0.344179	0.463216
WBGene00011517	cgt-1	0.34927	4.02392	7.16985	0.013935	0.344179	0.463216
WBGene00004997	spp-12	-3.07009	0.498792	10.1921	0.0139838	0.345178	0.461957
WBGene00008247	srsx-26	1.9464	-2.69626	7.15164	0.0140408	0.3464	0.460422
WBGene00017245	srpa-72	-0.240803	7.12128	7.14579	0.0140749	0.347061	0.459594
WBGene00011022	R05A10.5	-0.824934	-0.365719	7.14297	0.0140914	0.347284	0.459315
WBGene00017094	E02C12.9	5.13589	-4.00493	7.27189	0.0141035	0.347292	0.459305
WBGene00017316	F09G2.8	0.332482	4.10005	7.13913	0.014114	0.347292	0.459305
WBGene00019778	M57.2	-0.251084	5.77413	7.13945	0.0141121	0.347292	0.459305
WBGene00003409	mrp-3	-0.243233	5.43448	7.12337	0.0142068	0.348	0.458421
WBGene00008564	acox-1.1	-0.322142	7.44643	7.21631	0.0142206	0.348	0.458421
WBGene00012437	nmy-3	0.294731	6.8258	7.12861	0.0141758	0.348	0.458421
WBGene00012474	attf-6	-0.254001	4.93486	7.12159	0.0142173	0.348	0.458421
WBGene00016800	C50C3.2	1.16956	-1.16363	7.12129	0.0142191	0.348	0.458421
WBGene00017195	glo-4	0.249677	5.72969	7.1258	0.0141924	0.348	0.458421
WBGene00017804	not found	0.910036	-0.453439	7.12278	0.0142103	0.348	0.458421
WBGene00018052	F35F10.1	0.736596	2.99091	8.67303	0.0142244	0.348	0.458421
WBGene00022056	ddx-35	-0.28595	4.44576	7.12066	0.0142228	0.348	0.458421
WBGene00022063	nlp-81	0.626526	0.724891	7.12864	0.0141757	0.348	0.458421
WBGene00198859	F37B12.9	-5.09801	-4.22786	7.25088	0.0142233	0.348	0.458421
WBGene00014926	Y57G11C.30	-5.10897	-3.88353	7.23934	0.0142896	0.349413	0.45666
WBGene00001566	acdh-13	-0.266407	6.09088	7.10476	0.0143172	0.349508	0.456543
WBGene00010665	K08E3.5	-0.28844	8.2083	7.10558	0.0143123	0.349508	0.456543
WBGene00011129	R07H5.9	-0.896397	-0.558491	7.10475	0.0143173	0.349508	0.456543
WBGene00011830	cyp-29A2	-0.298513	5.57586	7.10374	0.0143233	0.349508	0.456543
WBGene00022674	ZK177.9	-5.10858	-3.78778	7.23221	0.0143307	0.349508	0.456543
WBGene00007267	C03A3.2	-0.237153	6.42005	7.09642	0.014367	0.350028	0.455897
WBGene00008576	F08G2.4	0.395984	2.75714	7.09687	0.0143643	0.350028	0.455897
WBGene00003524	nas-5	0.649864	1.16081	7.09204	0.0143933	0.350181	0.455708
WBGene00003845	odd-1	-0.57494	1.6358	7.09039	0.0144032	0.350181	0.455708
WBGene00007515	C10C6.7	0.872055	-0.303367	7.09178	0.0143948	0.350181	0.455708
WBGene00044774	F16B3.3	0.357631	3.14056	7.09152	0.0143964	0.350181	0.455708
WBGene00001450	flp-7	0.348507	3.57748	7.08308	0.0144471	0.350885	0.454835
WBGene00008099	C44H9.4	0.533256	2.24024	7.08324	0.0144462	0.350885	0.454835
WBGene00003956	pcp-1	-0.259406	7.4367	7.07621	0.0144886	0.351164	0.45449
WBGene00010274	F58G6.3	-0.384074	4.13779	7.20854	0.014482	0.351164	0.45449
WBGene00016785	C49G7.7	1.46493	-0.550197	7.54018	0.0144885	0.351164	0.45449
WBGene00021554	Y45G5AL.1	-0.262901	5.35081	7.07763	0.01448	0.351164	0.45449
WBGene00010943	M176.4	-0.29474	4.98229	7.07295	0.0145083	0.351461	0.454123
WBGene00198855	F59G1.12	-1.36062	-1.8513	7.07133	0.0145181	0.351517	0.454054
WBGene00008659	clec-151	4.7151	-3.38371	7.19796	0.0145302	0.351627	0.453918
WBGene00005113	srd-35	1.05102	-0.860404	7.0651	0.0145559	0.352068	0.453374
WBGene00003414	mrp-8	-0.31734	4.01713	7.06322	0.0145673	0.352162	0.453258
WBGene00007466	chil-2	1.86115	-2.6161	7.06039	0.0145845	0.352396	0.452969
WBGene00008043	C40H1.8	-0.530099	4.4214	8.36687	0.0145956	0.352483	0.452861
WBGene00010563	K04G2.4	1.55199	-1.72671	7.05346	0.0146268	0.352942	0.452296
WBGene00013802	Y116A8C.25	0.58592	1.10942	7.05298	0.0146297	0.352942	0.452296
WBGene00015695	ugt-26	-0.388751	6.06931	7.74554	0.0146695	0.35372	0.451341
WBGene00015371	C03A7.13	0.952118	-0.193788	7.04511	0.0146778	0.35374	0.451316
WBGene00010341	glo-3	-0.336892	3.82223	7.04305	0.0146905	0.353862	0.451166
WBGene00008480	eif-2A	-0.241947	8.0005	7.0404	0.0147067	0.354012	0.450982
WBGene00008593	clec-227	0.502792	1.84977	7.03958	0.0147118	0.354012	0.450982
WBGene00015981	elt-7	-0.555545	3.35754	7.81811	0.0147325	0.354147	0.450816
WBGene00019615	K10B4.3	0.282681	4.83631	7.03694	0.014728	0.354147	0.450816
WBGene00009824	gpdh-1	-2.02995	4.26681	11.1257	0.014781	0.35513	0.449613
WBGene00005210	srg-53	1.58234	-2.05584	7.02355	0.0148106	0.355213	0.449512
WBGene00009493	hrg-4	-0.548628	3.06273	7.58864	0.0148022	0.355213	0.449512
WBGene00013882	msa-1	0.270689	5.15009	7.02289	0.0148147	0.355213	0.449512
WBGene00016871	inso-1	-0.266244	4.69473	7.02297	0.0148142	0.355213	0.449512
WBGene00021861	Y54F10BM.6	1.7885	-2.38909	7.02131	0.0148245	0.355265	0.449448
WBGene00006111	str-46	5.1737	-4.27819	7.14334	0.0148548	0.355659	0.448966
WBGene00016483	C36C5.14	-2.11616	1.50744	10.8402	0.0148561	0.355659	0.448966
WBGene00021629	scpl-3	0.30166	4.42935	7.01468	0.0148657	0.355706	0.448909
WBGene00002065	iff-2	-0.264341	10.3475	7.00957	0.0148974	0.356167	0.448346
WBGene00003765	nlp-27	0.959405	4.02162	10.2847	0.0149001	0.356167	0.448346
WBGene00013011	snx-14	-0.254348	6.0238	7.00643	0.0149171	0.356223	0.448278
WBGene00018056	F35F10.6	-0.336456	3.20547	7.00633	0.0149177	0.356223	0.448278
WBGene00012810	nceh-1	-0.899697	2.11651	8.44153	0.0149442	0.356275	0.448215
WBGene00012923	fbxa-128	0.530649	2.18802	6.9999	0.0149578	0.356275	0.448215
WBGene00015469	C05D2.8	-0.296058	5.72302	7.00426	0.0149306	0.356275	0.448215
WBGene00018279	F41C6.6	-0.732656	0.496714	7.00308	0.014938	0.356275	0.448215
WBGene00019956	fbxb-75	-1.84155	-2.53714	7.00019	0.0149561	0.356275	0.448215
WBGene00010732	K10C3.5	-0.233241	6.29449	6.99648	0.0149793	0.356605	0.447812
WBGene00000162	apd-3	-0.234358	6.19621	6.99416	0.0149939	0.35677	0.447611
WBGene00019421	K05F6.10	2.92474	0.617789	10.9082	0.0150063	0.356884	0.447473
WBGene00001755	gst-7	-0.50142	6.35454	8.58992	0.0150213	0.357059	0.447259
WBGene00003903	pab-2	-0.256098	7.40652	6.98438	0.0150554	0.357437	0.4468
WBGene00008000	slc-17.2	-0.268138	5.92636	6.98364	0.01506	0.357437	0.4468
WBGene00009677	F44A6.5	-0.925605	5.39227	10.6212	0.0150515	0.357437	0.4468
WBGene00016592	erl-1	0.323564	3.39608	6.97744	0.0150992	0.358185	0.445892
WBGene00017925	F29B9.11	-0.361796	7.677	7.39851	0.0151181	0.358204	0.445869
WBGene00019061	F58F12.1	-0.323033	8.80631	7.00823	0.0151273	0.358204	0.445869
WBGene00019961	R08E5.1	-0.61416	0.846258	6.97249	0.0151306	0.358204	0.445869
WBGene00022853	ZK1127.6	-0.263406	5.17321	6.97444	0.0151182	0.358204	0.445869
WBGene00008690	F11C1.1	-0.306199	3.80582	6.96869	0.0151546	0.358232	0.445836
WBGene00010106	fbxb-61	3.61852	-3.70446	6.96978	0.0151477	0.358232	0.445836
WBGene00269421	R06F6.14	0.558262	1.79613	6.96909	0.0151521	0.358232	0.445836
WBGene00012028	srz-99	0.965883	-0.790587	6.96642	0.0151691	0.358393	0.445641
WBGene00012628	Y38H6C.16	-0.31892	3.97048	6.94951	0.015277	0.360761	0.44278
WBGene00003746	nlp-8	0.278989	4.61423	6.94693	0.0152936	0.360835	0.442691
WBGene00009980	F53F1.2	-0.339501	4.55501	6.95841	0.0152956	0.360835	0.442691
WBGene00000302	cav-2	1.40239	3.39886	10.7511	0.0153528	0.361277	0.442159
WBGene00007386	C06H2.2	0.255049	5.17086	6.9407	0.0153336	0.361277	0.442159
WBGene00011116	pdcd-2	-0.272447	5.60508	6.93826	0.0153493	0.361277	0.442159
WBGene00013457	paqr-3	-0.36716	4.21995	7.00367	0.0153495	0.361277	0.442159
WBGene00017100	E02H9.2	0.562507	1.72349	6.942	0.0153252	0.361277	0.442159
WBGene00002247	lam-1	0.27662	8.34926	6.93452	0.0153734	0.36158	0.441795
WBGene00015693	ugt-28	-0.438816	4.23809	7.49552	0.0153814	0.361587	0.441787
WBGene00004371	rig-4	0.300343	5.68201	6.91993	0.0154679	0.363438	0.439569
WBGene00023069	rncs-1	2.36179	-0.661626	9.31079	0.0154764	0.363455	0.43955
WBGene00004323	rde-1	0.25495	5.90184	6.9114	0.0155235	0.363938	0.438972
WBGene00012588	lips-16	-0.484515	2.01473	6.91394	0.0155069	0.363938	0.438972
WBGene00015395	nhr-147	0.559133	1.11146	6.913	0.015513	0.363938	0.438972
[truncated: 44,876 more rows]
